# Supplementary material for: Silver-catalysed double decarboxylative addition–cyclisation–elimination cascade sequence for the synthesis of quinolin-2-ones
Source: Royal Society of Chemistry journal article supplement (doi:10.1039/d2ob00521b), 2022-01-01

## Supporting Information

### Silver-catalysed double decarboxylative addition-cyclisation-elimination cascade sequence for the synthesis of quinolin-2-ones

C. Munashe Mazodze and Wade F. Petersen\*

Department of Chemistry, University of Cape Town, Rondebosch, Cape Town, 7700, South  
Africa

email: [wade.petersen@uct.ac.za](mailto:wade.petersen@uct.ac.za)

#### Table of Contents

|                                                                                                                          |     |
|--------------------------------------------------------------------------------------------------------------------------|-----|
| 1. General information.....                                                                                              | S2  |
| 2. Table S1: Reaction optimization for thermal mediated cascade sequence.....                                            | S3  |
| 3. Table S2: Solvent and metal salt screening for thermal mediated cascade sequence.....                                 | S5  |
| 4. Tables S3: Reaction optimization for visible light mediated cascade sequence.....                                     | S6  |
| 5. Table S4: Solvent and metal salt screening for visible light mediated cascade sequence.....                           | S7  |
| 6. General scheme for the synthesis of oxamic esters <b>(11)</b> .....                                                   | S8  |
| 7. General scheme for the synthesis of oxamic acids <b>(7)</b> .....                                                     | S8  |
| 8. General scheme for the synthesis of quinolin-2-ones <b>(10)</b> .....                                                 | S8  |
| 9. General synthetic procedure <b>A</b> : Synthesis of oxamic esters <b>(11)</b> .....                                   | S9  |
| 10. General synthetic procedure <b>B</b> : Synthesis of oxamic acids <b>(7)</b> .....                                    | S9  |
| 11. General synthetic procedure <b>C</b> : Thermal mediated Synthesis of quinoline-2-ones <b>(10)</b> .....              | S9  |
| 12. General synthetic procedure <b>D</b> : Visible-Light mediated Synthesis of quinoline-2(1H)-ones<br><b>(10)</b> ..... | S10 |
| 13. Characterization data of oxamic esters <b>(11)</b> .....                                                             | S11 |
| 14. Characterization data of oxamic acids <b>(7)</b> .....                                                               | S18 |
| 15. Characterization data of quinoline-2-ones <b>(10)</b> .....                                                          | S24 |
| 16. References.....                                                                                                      | S37 |
| 17. NMR Spectra.....                                                                                                     | S39 |

## 1. General information

Unless otherwise specified, all reagents were purchased from commercial sources and used without further purification. Anhydrous solvents were obtained using a solvent purification system drying over 3Å molecular sieves.  $^1\text{H}$  NMR,  $^{19}\text{F}$  NMR and  $^{13}\text{C}$  NMR spectra were recorded on Varian Mercury 300 MHz (75.5 MHz for  $^{13}\text{C}$ ), Bruker 400 MHz (101 MHz for  $^{13}\text{C}$ ), Bruker 600 MHz (151 MHz for  $^{13}\text{C}$  and 377 MHz for  $^{19}\text{F}$ ) instruments. All spectral data were acquired at 295 K. Chemical shifts are reported in parts per million (ppm,  $\delta$ ), downfield from tetramethyl silane (TMS,  $\delta = 0.00$  ppm), and are referenced to residual solvent [ $\text{CDCl}_3$ ,  $\delta = 7.26$  ppm ( $^1\text{H}$ ) and 77.16 ppm ( $^{13}\text{C}$ )]. Coupling constants ( $J$ ) are reported in Hertz (Hz). The multiplicity abbreviations used are br broad, s singlet, d doublet, t triplet, q quartet, m multiplet, app apparent. Infrared (IR) spectra were recorded on a PerkinElmer Spectrum 100 FT-IR spectrometer. High-resolution mass spectra were obtained from the University of Stellenbosch Mass Spectrometry Service and recorded in electrospray positive mode with a time-of-flight analyzer system on a Waters Synapt G2 machine. Thin-layer chromatography was carried out on Merck silica gel 60F<sub>254</sub> precoated aluminum foil sheets and were visualized using UV light (254 nm) or staining with basic potassium permanganate solution. Flash column chromatography was carried out using silica gel 60 (Merck 7734), eluting with the specified solvent system.

2. Table S1: Reaction optimization for thermal mediated cascade sequence

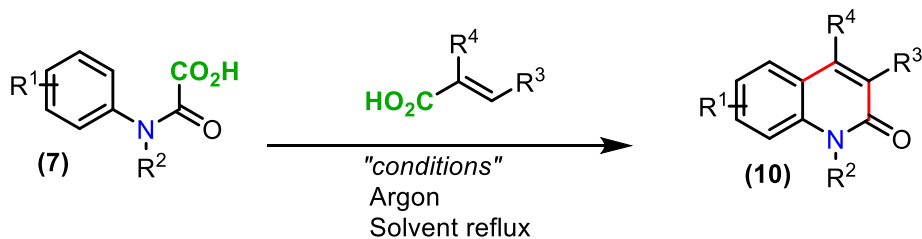

| entry            | catalyst (mol%)                         | equiv | oxidant                                      | equiv | solvent (v/v =1)     | yield 10 (%)       |
|------------------|-----------------------------------------|-------|----------------------------------------------|-------|----------------------|--------------------|
| 1                | Mn(OAc) <sub>3</sub> .2H <sub>2</sub> O | 3     | -                                            | -     | PhMe                 | 52                 |
| 2                | Mn(OAc) <sub>3</sub> .2H <sub>2</sub> O | 1.5   | -                                            | -     | PhMe                 | 12                 |
| 3                | Mn(OAc) <sub>3</sub> .2H <sub>2</sub> O | 1     | -                                            | -     | PhMe                 | <i>no reaction</i> |
| 4 <sup>b</sup>   | Mn(OAc) <sub>3</sub> .2H <sub>2</sub> O | 0.50  | -                                            | -     | PhMe                 | <i>no reaction</i> |
| 5                | AgNO <sub>3</sub>                       | 0.50  | K <sub>2</sub> S <sub>2</sub> O <sub>8</sub> | 3     | ACN/H <sub>2</sub> O | 58                 |
| 6                | Mn(OAc) <sub>3</sub> .2H <sub>2</sub> O | 0.50  | K <sub>2</sub> S <sub>2</sub> O <sub>8</sub> | 3     | ACN/H <sub>2</sub> O | 16                 |
| 7                | Fe(OAc) <sub>2</sub>                    | 0.50  | K <sub>2</sub> S <sub>2</sub> O <sub>8</sub> | 3     | ACN/H <sub>2</sub> O | 43                 |
| 8                | Co(OAc) <sub>2</sub>                    | 0.50  | K <sub>2</sub> S <sub>2</sub> O <sub>8</sub> | 3     | ACN/H <sub>2</sub> O | 36                 |
| 9                | Cu(OAc) <sub>2</sub> .2H <sub>2</sub> O | 0.50  | K <sub>2</sub> S <sub>2</sub> O <sub>8</sub> | 3     |                      | 12                 |
| 10 <sup>e</sup>  | AgNO <sub>3</sub>                       | 0.50  | K <sub>2</sub> S <sub>2</sub> O <sub>8</sub> | 3     | ACN/H <sub>2</sub> O | <i>no reaction</i> |
| 12 <sup>e</sup>  | -                                       | -     | K <sub>2</sub> S <sub>2</sub> O <sub>8</sub> | 3     | ACN/H <sub>2</sub> O | <i>no reaction</i> |
| 13               | -                                       | -     | K <sub>2</sub> S <sub>2</sub> O <sub>8</sub> | 3     | ACN/H <sub>2</sub> O | 35                 |
| 14               | AgNO <sub>3</sub>                       | 0.10  | K <sub>2</sub> S <sub>2</sub> O <sub>8</sub> | 3     | ACN/H <sub>2</sub> O | 37                 |
| 15               | AgNO <sub>3</sub>                       | 0.20  | K <sub>2</sub> S <sub>2</sub> O <sub>8</sub> | 3     | ACN/H <sub>2</sub> O | 34                 |
| 16               | AgNO <sub>3</sub>                       | 0.30  | K <sub>2</sub> S <sub>2</sub> O <sub>8</sub> | 3     | ACN/H <sub>2</sub> O | 40                 |
| 17               | AgNO <sub>3</sub>                       | 0.80  | K <sub>2</sub> S <sub>2</sub> O <sub>8</sub> |       | ACN/H <sub>2</sub> O | 56                 |
| 18               | AgNO <sub>3</sub>                       | 1.00  | K <sub>2</sub> S <sub>2</sub> O <sub>8</sub> | 3     | ACN/H <sub>2</sub> O | 58                 |
| 19 <sup>ac</sup> | AgNO <sub>3</sub>                       | 0.50  | K <sub>2</sub> S <sub>2</sub> O <sub>8</sub> | 3     | ACN/H <sub>2</sub> O | 60                 |
| 20               | AgNO <sub>3</sub>                       | 0.50  | K <sub>2</sub> S <sub>2</sub> O <sub>8</sub> | 4     | ACN/H <sub>2</sub> O | 27                 |
| 21               | AgNO <sub>3</sub>                       | 0.50  | K <sub>2</sub> S <sub>2</sub> O <sub>8</sub> | 6     | ACN/H <sub>2</sub> O | 25                 |
| 22               | AgNO <sub>3</sub>                       | 3     | -                                            | -     | ACN/H <sub>2</sub> O | <i>no reaction</i> |

|    |                   |      |                                                               |   |                      |                    |
|----|-------------------|------|---------------------------------------------------------------|---|----------------------|--------------------|
| 23 | AgNO <sub>3</sub> | 3    | NFSI                                                          | 3 | ACN/H <sub>2</sub> O | <i>no reaction</i> |
| 24 | AgNO <sub>3</sub> | 3    | H <sub>2</sub> O <sub>2</sub>                                 | 3 | ACN/H <sub>2</sub> O | <i>no reaction</i> |
| 25 | AgNO <sub>3</sub> | 3    | TBHP                                                          | 3 | ACN/H <sub>2</sub> O | <i>no reaction</i> |
| 26 | AgNO <sub>3</sub> | 0.50 | Na <sub>2</sub> S <sub>2</sub> O <sub>8</sub>                 | 3 | ACN/H <sub>2</sub> O | 33                 |
| 27 | AgNO <sub>3</sub> | 0.50 | (NH <sub>4</sub> ) <sub>2</sub> S <sub>2</sub> O <sub>8</sub> | 3 | ACN/H <sub>2</sub> O | 22                 |

Unless otherwise stated all reactions were performed under argon and all yields were determined by <sup>1</sup>H NMR using trimethoxy benzene as standard for 16hr. <sup>a</sup>Isolated Yields. <sup>b</sup>Open to air. <sup>c</sup>Acid base extracted Michael acceptor. <sup>d</sup>Reaction performed at room temperature.



### 3. Table S2: Solvent and metal salt screen for thermal cascade sequence

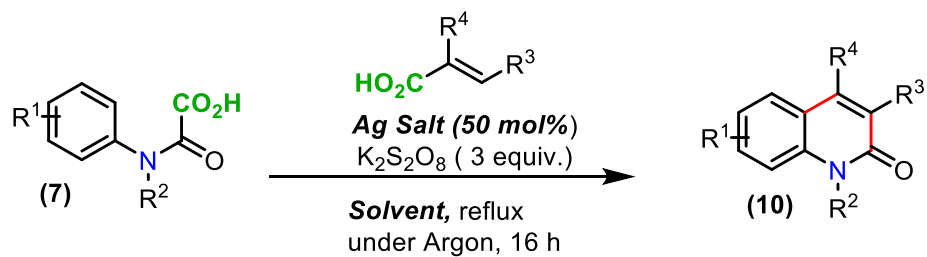

| entry            | solvent<br>(v/v =1)      | metal salt                      | yield              |
|------------------|--------------------------|---------------------------------|--------------------|
| 1 <sup>a,b</sup> | ACN/H <sub>2</sub> O     | AgNO <sub>3</sub>               | 60                 |
| 1                | ACN/H <sub>2</sub> O     | AgNO <sub>3</sub>               | 58                 |
| 2                | ACOH/H <sub>2</sub> O    | AgNO <sub>3</sub>               | 58                 |
| 3                | DMSO/ H <sub>2</sub> O   |                                 | 34                 |
| 4                | DMA/H <sub>2</sub> O     |                                 | 5                  |
| 5                | EtOH/H <sub>2</sub> O    |                                 | 38                 |
| 6                | PhMe/H <sub>2</sub> O    |                                 | 52                 |
| 7                | Acetone/H <sub>2</sub> O |                                 | 38                 |
| 8                | THF/H <sub>2</sub> O     |                                 | 23                 |
| 9                | Dioxane/H <sub>2</sub> O |                                 | 31                 |
| 10               | ACN/H <sub>2</sub> O     |                                 | AgOTf <sub>3</sub> |
| 11               | ACN/H <sub>2</sub> O     | Ag <sub>2</sub> SO <sub>4</sub> | 41                 |
| 12               | ACN/H <sub>2</sub> O     | AgClO <sub>4</sub>              | 33                 |
| 13               | ACN/H <sub>2</sub> O     | AgOCF <sub>3</sub>              | 44                 |
| 14               | ACN/H <sub>2</sub> O     | AgOAc                           | 41                 |

Unless otherwise stated all reactions were performed under argon and all yields were determined by <sup>1</sup>H NMR using trimethoxy benzene as standard for 16hr. <sup>a</sup>Isolated Yields. <sup>b</sup>Acid base extracted Michael acceptor.

#### 4. Table S3: Reaction optimisation for visible-light mediated cascade sequence.

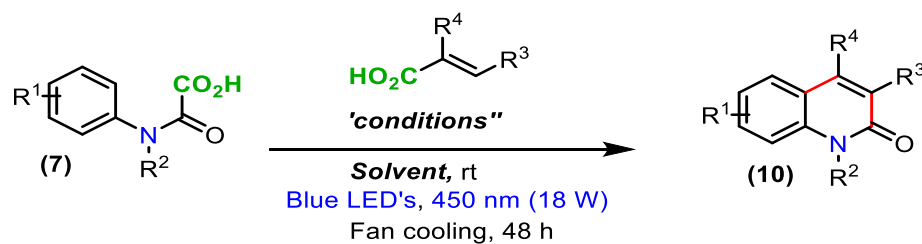

| entry           | photocatalyst                                                   | Equiv. | Metal Salt      | equiv | Oxidant                          | equiv | Solvent (v/v=1)           | Yield     |
|-----------------|-----------------------------------------------------------------|--------|-----------------|-------|----------------------------------|-------|---------------------------|-----------|
| 1               | -                                                               | -      | -               | -     | $\text{K}_2\text{S}_2\text{O}_8$ | 3.0   | ACN/ $\text{H}_2\text{O}$ | <b>13</b> |
| 2 <sup>c</sup>  | -                                                               | -      | -               | -     | $\text{K}_2\text{S}_2\text{O}_8$ | 3.0   | ACN/ $\text{H}_2\text{O}$ | <b>18</b> |
| 3               | -                                                               | -      | $\text{AgNO}_3$ | 0.50  | $\text{K}_2\text{S}_2\text{O}_8$ | 3.0   | ACN/ $\text{H}_2\text{O}$ | <b>22</b> |
| 4 <sup>b</sup>  | $\text{Ir}[\text{df}(\text{CF}_3)\text{ppy}]_2$<br>(dtbbpy)PF6) | 0.02   | -               | -     | -                                | -     | DMF/ $\text{H}_2\text{O}$ | -         |
| 5 <sup>d</sup>  | $\text{Ru}(\text{Bpyz})_3(\text{PF}_6)_2$                       | 0.05   | -               | -     | $\text{K}_2\text{S}_2\text{O}_8$ | 3.0   | ACN/ $\text{H}_2\text{O}$ | 54        |
| 6               | $\text{Ir}[\text{df}(\text{CF}_3)\text{ppy}]_2$<br>(dtbbpy)PF6) | 0.02   | -               | -     | $\text{K}_2\text{S}_2\text{O}_8$ | 3.0   | ACN/ $\text{H}_2\text{O}$ | -         |
| 7               | Mes-Acr-Ph                                                      | 0.20   | -               | -     | $\text{K}_2\text{S}_2\text{O}_8$ | 3.0   | ACN/ $\text{H}_2\text{O}$ | 19        |
| 8               | Cl-CTX                                                          | 0.20   | -               | -     | $\text{K}_2\text{S}_2\text{O}_8$ | 3.0   | ACN/ $\text{H}_2\text{O}$ | 25        |
| 9               | 4CzIPN                                                          | 0.02   | -               | -     | $\text{K}_2\text{S}_2\text{O}_8$ | 3.0   | ACN/ $\text{H}_2\text{O}$ | 25        |
| 10 <sup>e</sup> | $\text{Ru}(\text{Bpyz})_3(\text{PF}_6)_2$                       | 0.05   | $\text{AgNO}_3$ | 0.50  | $\text{K}_2\text{S}_2\text{O}_8$ | 3.0   | ACN/ $\text{H}_2\text{O}$ | 46        |
| 11 <sup>e</sup> | Cl-CTX                                                          | 0.20   | $\text{AgNO}_3$ | 0.50  | $\text{K}_2\text{S}_2\text{O}_8$ | 3.0   | ACN/ $\text{H}_2\text{O}$ | 43        |
| 12 <sup>a</sup> | 4CzIPN                                                          | 0.02   | $\text{AgNO}_3$ | 0.50  | $\text{K}_2\text{S}_2\text{O}_8$ | 3.0   | ACN/ $\text{H}_2\text{O}$ | <b>58</b> |
| 13              | Mes-Acr-Ph                                                      | 0.10   | $\text{AgNO}_3$ | 0.50  | $\text{K}_2\text{S}_2\text{O}_8$ | 3.0   | ACN/ $\text{H}_2\text{O}$ | 43        |
| 15              | Mes-Acr-Ph                                                      | 0.10   | $\text{AgNO}_3$ | 0.50  | (PhS) <sub>2</sub>               | 3.0   | TFE                       | 6         |
| 16              | Mes-Acr-Ph- <i>t</i> Bu                                         | 0.10   | $\text{AgNO}_3$ | 0.50  | $\text{K}_2\text{S}_2\text{O}_8$ | 3.0   | ACN/ $\text{H}_2\text{O}$ | 20        |
| 17 <sup>e</sup> | $\text{Ir}[\text{df}(\text{CF}_3)\text{ppy}]_2$<br>(dtbbpy)PF6) | 0.02   | $\text{AgNO}_3$ | 0.50  | $\text{K}_2\text{S}_2\text{O}_8$ | 3.0   | ACN/ $\text{H}_2\text{O}$ | 38        |
| 18              | Cl-4CzIPN                                                       | 0.02   | $\text{AgNO}_3$ | 0.50  | $\text{K}_2\text{S}_2\text{O}_8$ | 3.0   | ACN/ $\text{H}_2\text{O}$ | 51        |

Unless otherwise stated all reactions were performed under argon for 48 hr, 450nm LEDs were used and all yields were determined by <sup>1</sup>H NMR using trimethoxy benzene as standard. <sup>a</sup>Isolated Yields. <sup>b</sup>Open to air. <sup>c</sup>380nm LEDs used. <sup>d</sup> Reaction time 72 hr. <sup>e</sup> poor conversion after 48h.

5. Table S4: Solvent and metal salt optimization for visible-light mediated cascade sequence.

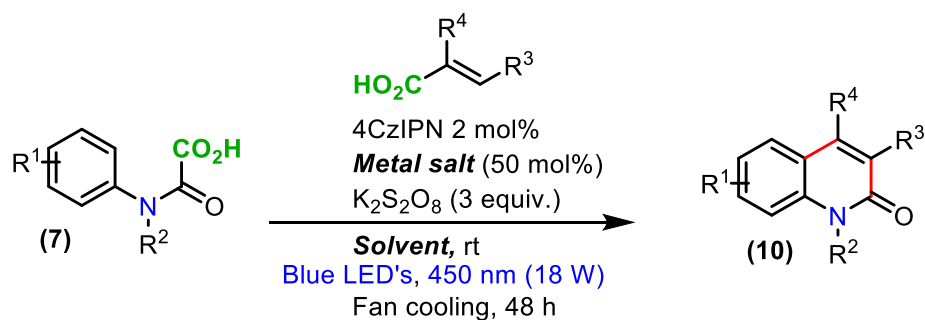

| entry          | metal salt                                         | solvent                       | yield                         |
|----------------|----------------------------------------------------|-------------------------------|-------------------------------|
| 1 <sup>a</sup> | $\text{AgNO}_3$                                    | ACN/ $\text{H}_2\text{O}$     | 58                            |
| 2              | $\text{Cu}(\text{OAc})\cdot\text{H}_2\text{O}$     | ACN/ $\text{H}_2\text{O}$     | 15                            |
| 3              | $\text{Mn}(\text{OAc})_3\cdot 2\text{H}_2\text{O}$ |                               | 7                             |
| 4              | $\text{Fe}(\text{OAc})_2$                          |                               | 45                            |
| 5              | $\text{Ni}(\text{OAc})_2$                          |                               | 15                            |
| 6              | $\text{Co}(\text{OAc})_2$                          |                               | Acetone/ $\text{H}_2\text{O}$ |
| 7              | $\text{AgNO}_3$                                    | THF/ $\text{H}_2\text{O}$     | 42                            |
| 8              |                                                    | DMF/ $\text{H}_2\text{O}$     | 18                            |
| 9              |                                                    | Dioxane/ $\text{H}_2\text{O}$ | 38                            |
| 10             |                                                    | DMSO/ $\text{H}_2\text{O}$    | 40                            |
| 11             |                                                    | EtOH/ $\text{H}_2\text{O}$    | 13                            |
| 12             |                                                    | DMA/ $\text{H}_2\text{O}$     | 23                            |
| 13             |                                                    | NMP/ $\text{H}_2\text{O}$     | -                             |
| 14             |                                                    | ACN/ $\text{H}_2\text{O}$     |                               |

Unless otherwise stated all reactions were performed under argon for 48 hr, 450nm LEDs were used and all yields were determined by  $^1\text{H}$  NMR using trimethoxy benzene as standard. <sup>a</sup>Isolated Yields. <sup>b</sup>Open to air. <sup>c</sup>380nm LEDs used. <sup>d</sup> Reaction time 72 hr. <sup>e</sup> poor conversion after 4h hr.

6. General scheme for the synthesis of oxamic esters (11)

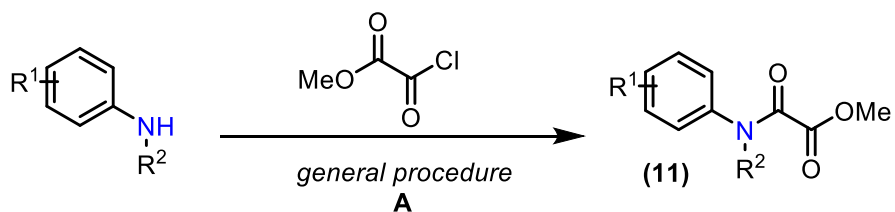

7. General scheme for the synthesis of (7)

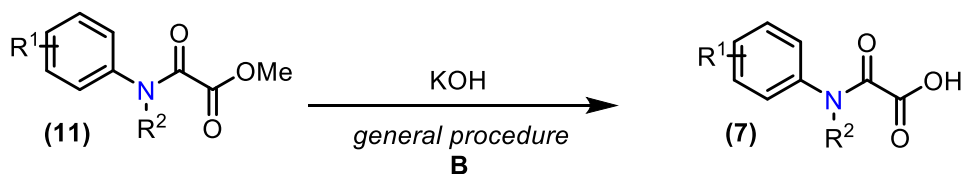

8. General scheme for the synthesis of (10)

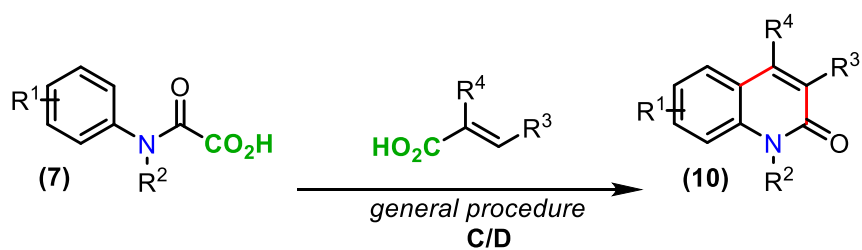

### **9. General synthetic procedure A: Synthesis of oxamic esters (11)**

To a solution of aniline (1.0 equiv.) and triethylamine or *N, N*-Diisopropylethylamine (1.2 equiv.) in dry CH<sub>2</sub>Cl<sub>2</sub> (3 mL/mmol of aniline) at 0 °C under argon, was added methyl 2-chloro-2-oxoacetate (1.2 equiv.) dropwise and the solution allowed to warm up to room temperature. After TLC analysis indicated full conversion of the starting material (10–12 h) an equal amount of deionized water was added. The layers were separated, and the aqueous layer was reextracted with CH<sub>2</sub>Cl<sub>2</sub> (x2). The combined organic extracts were washed with saturated aqueous NaHCO<sub>3</sub>, dried over MgSO<sub>4</sub>, filtered and concentrated in vacuo to give oxamic esters which were typically sufficiently pure to be used without further purification.

### **10. General synthetic procedure B: Synthesis of oxamic acids (7)**

To a solution of oxoester (1 equiv.) in THF, was added KOH (1.5 equiv.), dissolved in deionized water (~4:1 THF/water) and the reaction allowed to stir at room temperature. The resultant mixture was stirred at room temperature until the oxoester was completely consumed by TLC analysis (3–5 h). The reaction mixture was then diluted with an equivalent amount of deionized water and EtOAc. The layers were separated, and the aqueous layer was washed with EtOAc (x2) before being acidified to pH ~2-3 by the dropwise addition of 6M aqueous HCl. Thereafter, the aqueous layer was reextracted with EtOAc (x3), the combined organic extracts dried over MgSO<sub>4</sub> and concentrated in vacuo to give the appropriate β-oxoacids which could be purified by column chromatography on silica gel if needed.

### **11. General synthetic procedure C: Thermal mediated synthesis of quinoline-2-ones (10)**

A mixture of oxamic acid (1 equiv.), acrylic acid (3 equiv.), AgNO<sub>3</sub> (50 mol%) and K<sub>2</sub>S<sub>2</sub>O<sub>8</sub>, (3 equiv.) in a ~1:1 ACN/water was thoroughly degassed using an argon balloon, and the reaction left to stir at reflux temperature until TLC analysis indicated consumption of the starting material (~18 h). An equal amount of brine was then added and the organic layer separated. The aqueous layer was reextracted with or EtOAc (x3). The combined organic extracts washed with saturated aqueous NaHCO<sub>3</sub> dried over MgSO<sub>4</sub> and concentrated in vacuo. The resulting crude product was

purified by column chromatography on silica gel (Petroleum ether/EtOAc gradient) to afford Quinolin-2-ones (**10**).

#### **12. General synthetic procedure D: Visible-light mediated synthesis of quinoline-2-ones (10)**

A mixture of oxamic acid (1 equiv.), acrylic acid (3 equiv.), AgNO<sub>3</sub> (50 mol%), K<sub>2</sub>S<sub>2</sub>O<sub>8</sub>, (3 equiv.) and photocatalyst (4-CzIPN) (2 mol%) in ~1:1 ACN/water was thoroughly degassed using an argon balloon, the vial was sealed using parafilm, reaction mixture was irradiated with Blue LED's 450 nm and left to stir at room temperature until TLC analysis indicated consumption of the starting material (~48 h). An equal amount of saturated brine was then added, and the organic layer separated. The aqueous layer was reextracted with or EtOAc (x3) and the combined organic extracts washed with saturated aqueous NaHCO<sub>3</sub> before being dried over MgSO<sub>4</sub> and concentrated in vacuo. The resulting crude product was purified by column chromatography on silica gel (Petroleum ether/EtOAc gradient) to afford the Quinoline-2-ones (**10**).

### 13. Characterization data for oxamic esters (11)

#### Methyl 2-(methyl(phenyl)amino)-2-oxoacetate (**11a**)

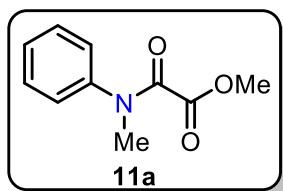

Prepared according to general procedure **A** using *N*-methylaniline (0.400 g, 2.7 mmol), triethylamine (0.56 mL, 4.0 mmol) and methyl 2-chloro-2-oxoacetate (0.30 mL, 3.2 mmol) in CH<sub>2</sub>Cl<sub>2</sub> (20 mL) to afford **11a** as a colourless oil (0.619 g, 98% yield). **IR** (film,  $\nu_{\max}/\text{cm}^{-1}$ ), 2952, 1741, 1664, 1593, 1496, 1450, 1391, 1229, 774, 699, 550; **R<sub>f</sub>** = 0.37 (2:3 EtOAc:Petroleum ether); **<sup>1</sup>H NMR** (300 MHz, CDCl<sub>3</sub>)  $\delta$  7.41–7.28 (m, 3H), 7.23–7.14 (m, 2H), 3.51 (s, 3H), 3.31 (s, 3H); **<sup>13</sup>C NMR** (101 MHz, CDCl<sub>3</sub>)  $\delta$  162.9, 161.5, 141.3, 129.6, 128.3, 126.1, 52.2, 36.0; **HRMS** (ESI<sup>+</sup>) *m/z*: [M + H] calcd for C<sub>10</sub>H<sub>12</sub>NO<sub>3</sub><sup>+</sup> 194.0812; found 194.0820.

#### Methyl 2-((4-fluorophenyl)(methyl)amino)-2-oxoacetate (**11b**)

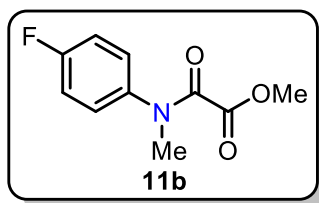

Prepared according to general procedure **A** using 4-fluoro-*N*-methylaniline (0.500 g, 4.0 mmol), triethylamine (0.84 mL, 6.0 mmol) methyl 2-chloro-2-oxoacetate (0.44 mL, 4.8 mmol) in CH<sub>2</sub>Cl<sub>2</sub> (20 mL) to afford **11b** as a colourless solid (0.800 g, 95 yield). **R<sub>f</sub>** = 0.43 (2:3 EtOAc:Petroleum ether); **M.P.** 73–75 °C; **IR** (film,  $\nu_{\max}/\text{cm}^{-1}$ ), 3074, 1734, 1667, 1502, 1455, 1399, 1221, 1149, 1113, 958, 851, 791, 553; **<sup>1</sup>H NMR** (300 MHz, CDCl<sub>3</sub>)  $\delta$  7.25–7.18 (m, 2H), 7.12–7.04 (m, 2H), 3.58 (s, 3H), 3.32 (s, 3H); **<sup>13</sup>C NMR** (151 MHz, CDCl<sub>3</sub>)  $\delta$  162.3, 162.1 (d,  $J_{C-F}$  = 249.1 Hz), 161.3, 137.6, 128.6 (d,  $J_{C-F}$  = 8.8 Hz), 116.7 (d,  $J_{C-F}$  = 22.9 Hz), 52.4, 36.5; **HRMS** (ESI<sup>+</sup>) *m/z*: [M + H] calcd for C<sub>10</sub>H<sub>11</sub>FNO<sub>3</sub><sup>+</sup> 212.0717; found 212.0724.

#### Methyl 2-((4-chlorophenyl)(methyl)amino)-2-oxoacetate (**11c**)<sup>1</sup>

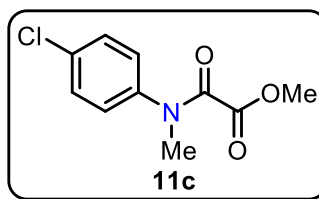

Prepared according to general procedure **A** using 4-Chloro-*N*-methyl aniline (0.500 g, 3.5 mmol), triethylamine (0.74 mL, 5.3 mmol) and methyl 2-chloro-2-oxoacetate (0.39 mL, 4.2 mmol) in CH<sub>2</sub>Cl<sub>2</sub> (20 mL) to afford **11c** as a colourless oil (0.745 g, 97 % yield). **R<sub>f</sub>** = 0.76 (3:7 EtOAc:Petroleum ether); **IR** (film,  $\nu_{\max}/\text{cm}^{-1}$ ), 2953, 1742, 1666, 1591, 1491, 1228, 1113, 1039, 838; **<sup>1</sup>H NMR** (300 MHz, CDCl<sub>3</sub>)  $\delta$  7.36 (d,  $J$  = 8.6 Hz, 2H), 7.16 (d,  $J$  = 8.6 Hz, 2H), 3.60 (s, 3H), 3.32

(s, 3H);  $^{13}\text{C}$  NMR (101 MHz,  $\text{CDCl}_3$ )  $\delta$  162.8, 161.4, 140.1, 134.4, 130.0, 127.7, 52.6, 36.3; HRMS (ESI $^+$ ) m/z: [M + H] calcd for  $\text{C}_{10}\text{H}_{11}\text{ClNO}_3^+$  228.0422; found 228.0430.

#### Methyl 2-((4-bromophenyl)(methyl)amino)-2-oxoacetate (**11d**)

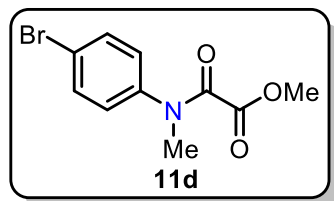

Prepared according to general procedure **A** using 4-Bromo-*N*-methyl aniline (0.500 g, 2.89 mmol), triethylamine (0.59 mL, 4.34 mmol) and methyl 2-chloro-2-oxoacetate (0.30 mL, 3.22 mmol) in  $\text{CH}_2\text{Cl}_2$  (20 mL) to afford **11d** as a colourless solid (0.753 g, 96 % yield).  $R_f$  = 0.30 (3:7 EtOAc:Petroleum ether); **M.P.** 49–51 °C; **IR** (film,  $\nu_{\text{max}}/\text{cm}^{-1}$ ), 2960, 1723, 1666, 1483, 1298, 1234, 1114, 779, 826, 539;  $^1\text{H}$  NMR (300 MHz,  $\text{CDCl}_3$ )  $\delta$  7.51 (d,  $J$  = 8.6 Hz, 2H), 7.10 (d,  $J$  = 8.6 Hz, 2H), 3.60 (s, 3H), 3.32 (s, 3H);  $^{13}\text{C}$  NMR (101 MHz,  $\text{CDCl}_3$ )  $\delta$  162.8, 161.3, 140.6, 133.0, 128.0, 122.3, 52.6, 36.3; HRMS (ESI $^+$ ) m/z: [M + H] calcd for  $\text{C}_{10}\text{H}_{11}\text{BrNO}_3^+$  271.9917; found 271.9971.

#### Methyl 2-((4-methoxyphenyl)(methyl)amino)-2-oxoacetate (**11e**)

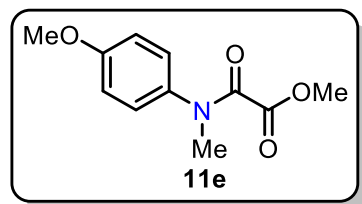

Prepared according to general procedure **A** using 4-Methoxy-*N*-methyl aniline (0.500 g, 3.64 mmol), triethylamine (0.76 mL, 5.46 mmol) and methyl 2-chloro-2-oxoacetate (0.40 mL, 4.37 mmol) in  $\text{CH}_2\text{Cl}_2$  (20 mL) to afford **11e** as brown solid (0.797 g, 98 % yield).  $R_f$  = 0.42 (2:3 EtOAc:Petroleum ether); **M.P.** 69–71 °C; **IR** (film,  $\nu_{\text{max}}/\text{cm}^{-1}$ ) 2953, 2840, 1741, 1661, 1510, 1455, 1392, 1296, 1231, 1114, 1028, 782, 557;  $^1\text{H}$  NMR (300 MHz,  $\text{CDCl}_3$ )  $\delta$  7.14 (d,  $J$  = 8.9 Hz, 2H), 6.86 (d,  $J$  = 8.9 Hz, 2H), 3.79 (s, 3H), 3.55 (s, 3H), 3.28 (s, 3H);  $^{13}\text{C}$  NMR (101 MHz,  $\text{CDCl}_3$ )  $\delta$  163.2, 161.9, 159.4, 134.0, 127.9, 114.7, 55.5, 52.2, 36.4; HRMS (ESI $^+$ ) m/z: [M + H] calcd for  $\text{C}_{11}\text{H}_{14}\text{NO}_4^+$  224.0917; found 224.0927.



### Methyl 2-(methyl(phenyl)amino)-2-oxoacetate (**11f**)

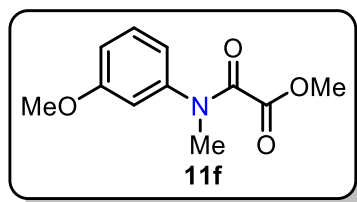

Prepared according to general procedure **A** using 3-methoxy-*N*-methylaniline (0.600 g, 3.46 mmol), triethylamine (1.50 mL, 10.30 mmol) and methyl 2-chloro-2-oxoacetate (0.477 mL, 5.18 mmol) in CH<sub>2</sub>Cl<sub>2</sub> (20 mL) to afford **11f** as a yellow oil (0.758 g, 98 yield). **R<sub>f</sub>** = 0.52 (2:3 EtOAc:Petroleum ether); **IR** (film,  $\nu_{\max}/\text{cm}^{-1}$ ); 2951, 1831, 1742, 1662, 1596, 1489, 1459, 1220, 1113, 1039, 782, 697; **<sup>1</sup>H NMR** (300 MHz, CDCl<sub>3</sub>)  $\delta$  7.27 (t,  $J$  = 8.1 Hz, 1H), 6.86 (ddd,  $J$  = 8.4, 2.5, 0.9 Hz, 1H), 6.79 (ddd,  $J$  = 7.8, 2.0, 0.9 Hz, 1H), 6.74 (t,  $J$  = 2.2 Hz, 1H), 3.79 (s, 3H), 3.59 (s, 3H), 3.34 (s, 3H) **<sup>13</sup>C NMR** (151 MHz, CDCl<sub>3</sub>)  $\delta$  163.1, 161.7, 160.5, 142.7, 130.4, 118.3, 114.1, 111.9, 55.6, 52.4, 36.2; **HRMS** (ESI<sup>+</sup>)  $m/z$ : [M + H] calcd for C<sub>11</sub>H<sub>14</sub>NO<sub>4</sub><sup>+</sup> 224.0917; found 224.0920.

### Methyl 2-((4-acetylphenyl)(methyl)amino)-2-oxoacetate (**11g**)

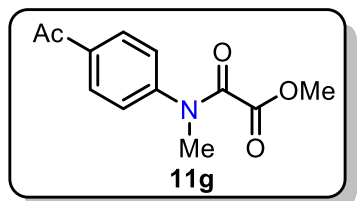

Prepared according to general procedure **A** using 4-Acetyl-*N*-methyl aniline (0.400 g, 2.68 mmol), triethylamine (0.560 mL, 4.02 mmol) and methyl 2-chloro-2-oxoacetate (0.296 mL, 3.22 mmol) in CH<sub>2</sub>Cl<sub>2</sub> (20 mL) to afford **11g** as a colourless oil (0.619 g, 98% yield). **R<sub>f</sub>** = 0.37 (2:3 EtOAc:Petroleum ether); **M.P.** 69–71 °C; **IR** (film,  $\nu_{\max}/\text{cm}^{-1}$ ) 2954, 1877, 1743, 1669, 1598, 1382, 1262, 1229, 1115, 861, 846; **<sup>1</sup>H NMR** (300 MHz, CDCl<sub>3</sub>)  $\delta$  7.97 (d,  $J$  = 8.5 Hz, 2H), 7.28 (d,  $J$  = 8.5 Hz, 2H), 3.58 (s, 3H), 3.36 (s, 3H), 2.58 (s, 3H); **<sup>13</sup>C NMR** (75 MHz, CDCl<sub>3</sub>)  $\delta$  196.8, 162.6, 161.1, 145.6, 136.4, 129.8, 125.7, 52.6, 36.0, 26.7; **HRMS** (ESI<sup>+</sup>)  $m/z$ : [M + H] calcd for C<sub>12</sub>H<sub>14</sub>NO<sub>4</sub><sup>+</sup> 236.0917; found 236.0918.

### Methyl 2-((4-cyanophenyl)(methyl)amino)-2-oxoacetate (**11h**)

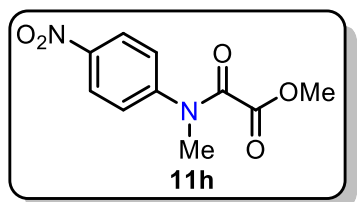

Prepared according to general procedure **A** using *N*-methyl-4-nitroaniline (0.800 g, 5.26 mmol), DIPEA (2.75 mL, 15.78 mmol) and methyl 2-chloro-2-oxoacetate (0.725 mL, 7.89 mmol), pyridine (0.229 mL, 2.63 mmol) in CH<sub>2</sub>Cl<sub>2</sub> (20 mL) to afford **11h** as a light-yellow solid (1.221 g, 97 % yield). **R<sub>f</sub>** = 0.51 (2:3 EtOAc:Petroleum ether); **M.P.** 94–96 °C; **IR**

(film,  $\nu_{\max}/\text{cm}^{-1}$ ) 2960, 1725, 1669, 1589, 1514, 1338, 1296, 1235, 1108, 855, 783, 694, 540;  $^1\text{H NMR}$  (300 MHz,  $\text{CDCl}_3$ )  $\delta$  8.27 (d,  $J = 8.4$  Hz, 2H), 7.38 (d,  $J = 8.4$  Hz, 2H), 3.65 (bs, 3H), 3.42 (s, 3H);  $^{13}\text{C NMR}$  (151 MHz,  $\text{CDCl}_3$ )  $\delta$  162.3, 161.0, 147.4, 147.0, 126.4, 125.2, 52.9, 36.4; **HRMS** (ESI<sup>+</sup>)  $m/z$ : [M + H] calcd for  $\text{C}_{10}\text{H}_{11}\text{N}_2\text{O}_5^+$  239.0662; found 239.0673.

### Methyl 2-(methyl(4-nitrophenyl)amino)-2-oxoacetate (**11i**)

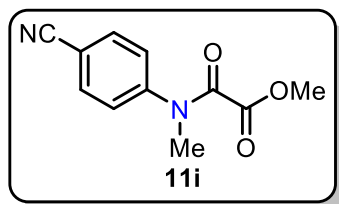

Prepared according to general procedure **A** using 4-(methylamino)benzonitrile (0.800 g, 6.05 mmol), DIPEA (3.20 mL, 15.78 mmol) and methyl 2-chloro-2-oxoacetate (0.84 mL, 9.08 mmol), pyridine (0.244 mL, 3.05 mmol) in  $\text{CH}_2\text{Cl}_2$  (20 mL) to afford **11i** as a light-yellow solid (1.221 g, 97 % yield).  $R_f = 0.54$  (2:3 EtOAc:Petroleum ether); **M.P.** 90–92 °C; **IR** (film,  $\nu_{\max}/\text{cm}^{-1}$ ) 2959, 2226, 1724, 1672, 1602, 1560, 1237, 1117, 884, 791, 570;  $^1\text{H NMR}$  (300 MHz,  $\text{CDCl}_3$ )  $\delta$  7.71 (d,  $J = 8.5$  Hz, 2H), 7.33 (d,  $J = 8.5$  Hz, 2H), 3.64 (s, 3H), 3.39 (s, 4H);  $^{13}\text{C NMR}$  (151 MHz,  $\text{CDCl}_3$ )  $\delta$  162.4, 161.0, 145.8, 133.7, 126.6, 117.9, 112.3, 52.8, 36.2; **HRMS** (ESI<sup>+</sup>)  $m/z$ : [M + H] calcd for  $\text{C}_{11}\text{H}_{11}\text{N}_2\text{O}_3^+$  219.0764; found 219.0770.

### Methyl 2-((3,5-difluorophenyl)(methyl)amino)-2-oxoacetate (**11j**)

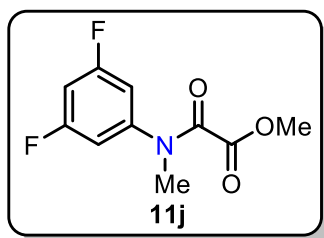

Prepared according to general procedure **A** using 3,5-difluoro-*N*-methylaniline (0.500 g, 3.49 mmol), triethylamine (0.983 mL, 5.24 mmol) and methyl 2-chloro-2-oxoacetate (0.386 mL, 4.19 mmol) in  $\text{CH}_2\text{Cl}_2$  (20 mL) to afford **11j** as a yellow solid (0.787 g, 98% yield).  $R_f = 0.69$  (1:4 EtOAc:Petroleum ether); **M.P.** 78–80 °C; **IR** (film,  $\nu_{\max}/\text{cm}^{-1}$ ) 3056, 1673, 1607, 1464, 1429, 1394, 1347, 1204, 1118, 980, 872, 843, 685;  $^{19}\text{F NMR}$  (377 MHz,  $\text{CDCl}_3$ )  $\delta$  -106.99;  $^1\text{H NMR}$  (300 MHz,  $\text{CDCl}_3$ )  $\delta$  6.86–6.73 (m, 3H), 3.67 (s, 3H), 3.34 (s, 4H);  $^{13}\text{C NMR}$  (101 MHz,  $\text{CDCl}_3$ )  $\delta$  163.2 (dd,  $J_{\text{C-F}} = 251.4, 14.1$  Hz), 162.4, 161.1, 143.9 (t,  $J_{\text{C-F}} = 11.9$  Hz), 109.6 (d,  $J_{\text{C-F}} = 27.1$  Hz), 104.2 (t,  $J_{\text{C-F}} = 25.2$  Hz), 52.8, 36.2; **HRMS** (ESI<sup>+</sup>)  $m/z$ : [M + H] calcd for  $\text{C}_{10}\text{H}_{10}\text{F}_2\text{NO}_3^+$  230.0623; found 230.0633.

### Methyl 2-((3,4-dichlorophenyl)(methyl)amino)-2-oxoacetate (**11k**)

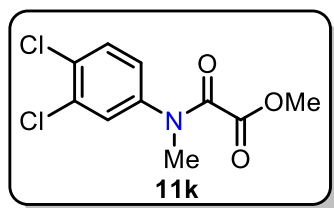

Prepared according to general procedure **A** using 3,4-dichloro-*N*-methylaniline (0.500 g, 2.84 mmol), triethylamine (0.594 mL, 4.26 mmol) and methyl 2-chloro-2-oxoacetate (0.313 mL, 3.41 mmol) in CH<sub>2</sub>Cl<sub>2</sub> (20 mL) to afford **11k** as brown solid (0.739 g, 99 % yield). **R<sub>f</sub>** = 0.85 (2:3 EtOAc:Petroleum ether); **M.P.** 213–215 °C; **IR** (film,  $\nu_{\max}/\text{cm}^{-1}$ ) 3060, 1746, 1671, 1589, 1467, 1413, 1375, 1226, 1118, 871, 826, 608; **<sup>1</sup>H NMR** (300 MHz, CDCl<sub>3</sub>)  $\delta$  7.47 (d,  $J$  = 8.5 Hz, 1H), 7.35 (d,  $J$  = 2.5 Hz, 1H), 7.08 (dd,  $J$  = 8.5, 2.5 Hz, 1H), 3.65 (s, 3H), 3.33 (s, 3H); **<sup>13</sup>C NMR** (75 MHz, CDCl<sub>3</sub>)  $\delta$  162.5, 161.1, 140.9, 133.7, 132.8, 131.4, 128.2, 125.6, 52.8, 36.4; **HRMS** (ESI<sup>+</sup>)  $m/z$ : [M + H] calcd for C<sub>10</sub>H<sub>10</sub>Cl<sub>2</sub>NO<sub>3</sub><sup>+</sup> 262.0032; found 262.0042.

### Methyl 2-((4-bromo-3,5-difluorophenyl)(methyl)amino)-2-oxoacetate<sup>9</sup>

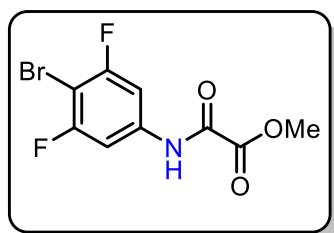

Prepared according to general procedure **A** using 4-bromo-3,5-difluoroaniline (0.800 g, 3.85 mmol), triethylamine (1.07 mL, 7.70 mmol) and methyl 2-chloro-2-oxoacetate (0.531 mL, 5.76 mmol) in CH<sub>2</sub>Cl<sub>2</sub> (30 mL) to afford methyl 2-((4-bromo-3,5-difluorophenyl)(methyl)amino)-2-oxoacetate as a white solid (0.949 g, 83% yield). **R<sub>f</sub>** = 0.26 (1:4 EtOAc:Petroleum ether); **M.P.** 174–176 °C; **IR** (film,  $\nu_{\max}/\text{cm}^{-1}$ ) 3421, 3334, 3118, 3047, 1739, 1686, 1606, 1548, 1423, 1277, 1213, 1033, 872, 579, 534, **<sup>19</sup>F NMR** (377 MHz, CDCl<sub>3</sub>)  $\delta$  -101.42, -103.20; **<sup>1</sup>H NMR** (300 MHz, CDCl<sub>3</sub>)(tautomers)  $\delta$  8.99 (bs, 1H), 7.39 (d,  $J$  = 7.6 Hz, 1H), 6.94 (d,  $J$  = 6.0 Hz, 2H), 3.98 (s, 2H), 3.87 (s, 4H); **<sup>13</sup>C NMR** (101 MHz, CDCl<sub>3</sub>)(tautomers)  $\delta$  160.9, 160.4, 160.3 (dd,  $J_{\text{C-F}}$  = 252.3, 5.4 Hz), 160.2 (dd,  $J_{\text{C-F}}$  = 247.5, 5.9 Hz), 153.9, 137.0 (t,  $J_{\text{C-F}}$  = 12.7 Hz), 134.1 (t,  $J_{\text{C-F}}$  = 11.6 Hz), 113.1 (d,  $J_{\text{C-F}}$  = 28.4 Hz), 103.9 (dd,  $J_{\text{C-F}}$  = 28.2, 3.0 Hz), 101.2 (t,  $J_{\text{C-F}}$  = 24.2 Hz), 94.1 (t,  $J_{\text{C-F}}$  = 24.6 Hz), 54.5 (d,  $J_{\text{C-F}}$  = 4.5 Hz), 54.0 (d,  $J_{\text{C-F}}$  = 4.5 Hz).

### Methyl 2-((4-bromo-3,5-difluorophenyl)(methyl)amino)-2-oxoacetate (**11l**)

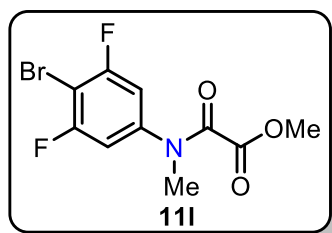

Prepared using oxamic ester methyl 2-((4-bromo-3,5-difluorophenyl)(methyl)amino)-2-oxoacetate 0.899 g, 3.06 mmol), methyl iodide (0.285 mL, 4.56 mmol) and Sodium hydride (0.109 mL, 4.56 mmol) in DMF (30 mL) to afford **11l** as a white solid (0.507 g, 54% yield). **M.P.** 140–142 °C;  $R_f = 0.45$  (1:4 EtOAc:Petroleum ether);

**IR** (film,  $\nu_{\max}/\text{cm}^{-1}$ ) 3052, 1744, 1671, 1583, 1459, 1406, 1208, 1023, 880, 766, 583;  **$^{19}\text{F}$  NMR** (377 MHz,  $\text{CDCl}_3$ )  $\delta$  -101.99, -103.45;  **$^1\text{H}$  NMR** (300 MHz,  $\text{CDCl}_3$ )  $\delta$  6.87 (d,  $J = 6.9$  Hz, 2H), 3.70 (s, 3H), 3.34 (s, 3H);  **$^{13}\text{C}$  NMR** (101 MHz,  $\text{CDCl}_3$ )  $\delta$  162.2, 160.9, 160.3 (dd,  $J_{\text{C-F}} = 250.7, 4.6$  Hz), 142.3 (t,  $J_{\text{C-F}} = 11.4$  Hz), 110.2 (d,  $J_{\text{C-F}} = 24.9$  Hz), 98.2 (q,  $J_{\text{C-F}} = 24.4, 23.7$  Hz), 53.0, 36.3; **HRMS** (ESI<sup>+</sup>)  $m/z$ : [M + H] calcd for  $\text{C}_{10}\text{H}_9\text{BrF}_2\text{NO}_3^+$  307.9728; found 307.9739.

### Methyl 2-(benzyl(phenyl)amino)-2-oxoacetate (**11n**)

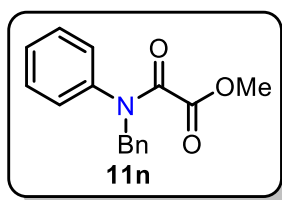

Prepared according to general procedure **A** using *N*-benzylaniline (0.500 g, 2.53 mmol), triethylamine (0.529 mL, 3.78 mmol) and methyl 2-chloro-2-oxoacetate (0.278 mL, 3.04 mmol) in  $\text{CH}_2\text{Cl}_2$  (20 mL) to afford **11n** as a brown oil (0.680 g, 99% yield).  $R_f = 0.67$  (2:3 EtOAc:Petroleum ether);

**IR** (film,  $\nu_{\max}/\text{cm}^{-1}$ ) 3321, 2924, 1724, 1660, 1433, 1229, 743, 698;  **$^1\text{H}$  NMR** (300 MHz,  $\text{CDCl}_3$ )  $\delta$  7.35–7.27 (m, 6H), 7.26–7.21 (m, 2H), 7.10–7.05 (m, 2H), 4.97 (s, 2H), 3.56 (s, 3H);  **$^{13}\text{C}$  NMR** (151 MHz,  $\text{CDCl}_3$ )  $\delta$  163.0, 161.8, 139.9, 136.0, 129.5, 128.9, 128.7, 128.7, 128.0, 127.2, 52.4, 52.2; **HRMS** (ESI<sup>+</sup>)  $m/z$ : [M + H] calcd for  $\text{C}_{16}\text{H}_{16}\text{NO}_3^+$  270.1125; found 270.1126.

### Methyl 2-(diphenylamino)-2-oxoacetate (**11p**)<sup>2</sup>

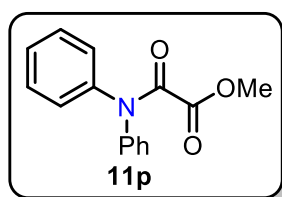

Prepared according to general procedure **A** using diphenylamine (0.508 g, 3.00 mmol), triethylamine (0.627 mL, 4.50 mmol) and methyl 2-chloro-2-oxoacetate (0.332 mL, 3.06 mmol) in  $\text{CH}_2\text{Cl}_2$  (20 mL) to afford **11p** as a white solid (0.745 g, 97 % yield).  $R_f = 0.68$  (2:3 EtOAc:Petroleum ether);

**M.P.** 103–105 °C; **IR** (film,  $\nu_{\max}/\text{cm}^{-1}$ ) 3373, 3953, 1735, 1674, 1489, 1377, 1239, 1145, 759, 695;  **$^1\text{H}$  NMR** (300 MHz,  $\text{CDCl}_3$ )  $\delta$  7.38 (t,  $J = 7.5$  Hz, 5H), 7.33–7.24 (m, 5H), 3.61 (s, 3H);  **$^{13}\text{C}$**

**NMR** (101 MHz, CDCl<sub>3</sub>)  $\delta$  163.1, 161.1, 140.6, 140.5, 129.8, 129.3, 128.7, 127.9, 127.2, 125.9, 52.5. All recorded data were in accordance with those previously reported.

### Methyl 2-(indolin-1-yl)-2-oxoacetate (**11q**)

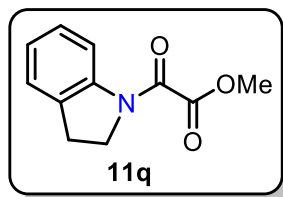

Prepared according to general procedure **A** using indoline (0.500 g, 4.20 mmol), triethylamine (0.880 mL, 6.30 mmol) and methyl 2-chloro-2-oxoacetate (0.463 mL, 5.04 mmol) in CH<sub>2</sub>Cl<sub>2</sub> (20 mL) to afford **11q** as a yellow oil (0.788 g, 91 yield). **R<sub>f</sub>** = 0.64 (2:3 EtOAc:Petroleum ether); **IR** (film,  $\nu_{\max}/\text{cm}^{-1}$ ) 2955, 1738, 1597, 1484, 1417, 1249, 1097, 973, 759; **<sup>1</sup>H NMR** (300 MHz, CDCl<sub>3</sub>)  $\delta$  8.22 (d,  $J$  = 7.5 Hz, 1H), 7.30–7.22 (m, 2H), 7.13 (t,  $J$  = 7.5 Hz, 1H), 4.31 (t,  $J$  = 8.3 Hz, 2H), 3.94 (s, 3H), 3.23 (t,  $J$  = 8.3 Hz, 2H); **<sup>13</sup>C NMR** (151 MHz, CDCl<sub>3</sub>)  $\delta$  162.2, 157.4, 141.8, 132.2, 127.8, 125.4, 124.9, 118.0, 53.0, 48.7, 28.3; **HRMS** (ESI<sup>+</sup>)  $m/z$ : [M + H] calcd for C<sub>11</sub>H<sub>12</sub>NO<sub>3</sub><sup>+</sup> 206.0812; found 206.0813.

### Methyl 2-(6-methoxy-3,4-dihydroquinolin-1(2H)-yl)-2-oxoacetate (**11r**)

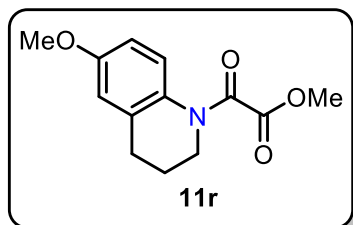

Prepared according to general procedure **A** using 6-methoxy-1,2,3,4-tetrahydroquinoline (0.460 g, 2.82 mmol), triethylamine (0.590 mL, 4.23 mmol) and methyl 2-chloro-2-oxoacetate (0.311 mL, 3.38 mmol) in CH<sub>2</sub>Cl<sub>2</sub> (20 mL) to afford **11r** as brown solid (0.640 g, 96% yield). **R<sub>f</sub>** = 0.54 (3:7 EtOAc:Petroleum ether); **M.P.** 65–67 °C; **IR** (film,  $\nu_{\max}/\text{cm}^{-1}$ ) 2962, 1747, 1644, 1501, 1441, 1403, 1311, 1200, 1157, 1016, 873, 763, 720; **<sup>1</sup>H NMR** (300 MHz, CDCl<sub>3</sub>)  $\delta$  6.91 (d,  $J$  = 8.7 Hz, 1H), 6.78–6.61 (m, 3H), 3.88–3.79 (m, 2H), 3.77 (s, 3H), 3.70 (s, 3H), 2.74 (t,  $J$  = 6.5 Hz, 2H), 2.06–1.94 (m, 2H); **<sup>13</sup>C NMR** (75 MHz, CDCl<sub>3</sub>)  $\delta$  163.7, 160.9, 157.9, 134.1, 129.9, 122.2, 114.2, 111.8, 55.4, 52.6, 42.4, 27.0, 23.1; **HRMS** (ESI<sup>+</sup>)  $m/z$ : [M + H] calcd for C<sub>13</sub>H<sub>16</sub>NO<sub>4</sub><sup>+</sup> 250.1074; found 250.1078

### Methyl 2-oxo-2-(phenylamino)acetate

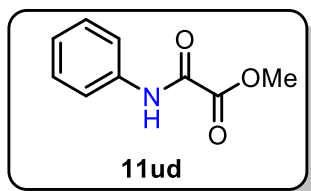

Prepared according to general procedure **A** aniline (0.600 g, 6.44 mmol), triethylamine (1.80 mL, 12.88 mmol) and methyl 2-chloro-2-oxoacetate (0.711 mL, 7.73 mmol) in  $\text{CH}_2\text{Cl}_2$  (20 mL) to afford **11ud** as white solid (1.102 g, 95% yield). **M.P.** 102–104 °C;  $R_f = 0.23$  (2:3 EtOAc:Petroleum ether); **IR** (film,  $\nu_{\text{max}}/\text{cm}^{-1}$ ) 3336, 1692, 1587, 1537, 1292, 11169, 758, 708, 547;  **$^1\text{H NMR}$**  (300 MHz,  $\text{CDCl}_3$ )  $\delta$  8.95 (s, 1H), 7.64 (d,  $J = 7.4$  Hz, 2H), 7.36 (t,  $J = 7.4$  Hz, 2H), 7.22–7.14 (m, 1H), 3.94 (s, 3H);  **$^{13}\text{C NMR}$**  (75 MHz,  $\text{CDCl}_3$ )  $\delta$  161.5, 153.7, 136.3, 129.3, 125.6, 119.9, 54.1; **HRMS** (ESI<sup>+</sup>)  $m/z$ :  $[\text{M} + \text{H}]$  calcd for  $\text{C}_9\text{H}_{10}\text{NO}_3^+$  180.0665; found 180.0667.

### 14. Characterization data for oxamic acids (**7**)

#### 2-(methyl(phenyl)amino)-2-oxoacetic acid (**7a**)<sup>3</sup>

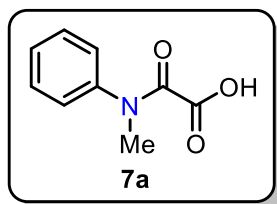

Prepared according to general procedure **B** using oxamic ester **11a** (0.562 g, 2.92 mmol), potassium hydroxide (0.246 g, 4.38 mL) in THF (30 mL) to afford **7a** as a white solid (0.450 g, 86 % yield).  $R_f = 0.24$  (1:4 MeOH:DCM);  **$^1\text{H NMR}$**  (300 MHz,  $\text{CDCl}_3$ )  $\delta$  10.19 (s, 1H), 7.40–7.34 (m, 3H), 7.28–7.17 (m, 3H), 3.34 (s, 3H);  **$^{13}\text{C NMR}$**  (101 MHz,  $\text{CDCl}_3$ )  $\delta$  161.4, 160.9, 141.9, 129.8, 128.7, 126.2, 38.0. All recorded data were in accordance with those previously reported.

#### 2-((4-fluorophenyl)(methyl)amino)-2-oxoacetic acid (**7b**)<sup>1</sup>

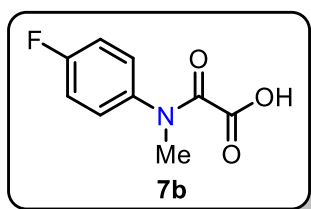

Prepared according to general procedure **B** using oxamic ester **11b** (0.491 g, 2.32 mmol), potassium hydroxide (0.195 g, 3.48 mL) in THF (30 mL) to afford **7b** as a white solid (0.393 g, 86 % yield).  $R_f = 0.15$  (1:4 MeOH:DCM);  **$^1\text{H NMR}$**  (300 MHz,  $\text{CDCl}_3$ )  $\delta$  7.24–7.16 (m, 2H), 7.15–7.06 (m, 2H), 3.37 (s, 3H);  **$^{13}\text{C NMR}$**  (151 MHz,  $\text{CDCl}_3$ )  $\delta$  162.4 (d,  $J_{\text{C-F}} = 248.9$  Hz), 160.0, 159.7, 138.2, 128.2 (d,  $J_{\text{C-F}} = 8.7$  Hz), 116.8 (d,  $J_{\text{C-F}} = 23.0$  Hz), 38.9. All recorded data were in accordance with those previously reported.

### 2-((4-chlorophenyl)(methyl)amino)-2-oxoacetic acid (**7c**)<sup>3</sup>

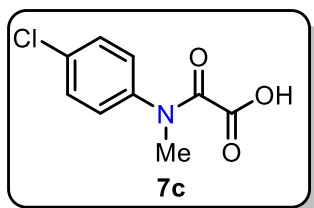

Prepared according to general procedure **B** using oxamic ester **11c** (0.500 g, 2.20 mmol), potassium hydroxide (0.185 g, 3.29 mL) in THF (30 mL) to afford **7c** as a white solid (0.452 g, 96 % yield).  $R_f = 0.68$  (1:4 MeOH:DCM);  $^1\text{H NMR}$  (300 MHz,  $\text{CDCl}_3$ )  $\delta$  7.39 (d,  $J = 8.6$  Hz, 2H), 7.16 (d,  $J = 8.6$  Hz, 2H), 3.37 (s, 3H);  $^{13}\text{C NMR}$  (101 MHz,  $\text{CDCl}_3$ )  $\delta$  159.9, 159.8, 140.5, 134.5, 129.9, 127.4, 38.5. All recorded data were in accordance with those previously reported.

### 2-((4-bromophenyl)(methyl)amino)-2-oxoacetic acid (**7d**)<sup>3</sup>

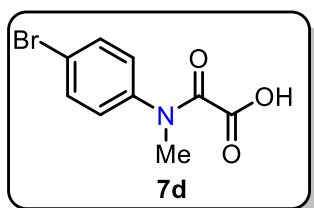

Prepared according to general procedure **B** using oxamic ester **11d** (0.500 g, 1.84 mmol), potassium hydroxide (0.154 g, 2.76 mL) in THF (30 mL) to afford **7d** as a brown solid (0.467 g, 98% yield).  $R_f = 0.32$  (1:4 MeOH:DCM);  $^1\text{H NMR}$  (300 MHz,  $\text{CDCl}_3$ )  $\delta$  7.54 (d,  $J = 8.6$  Hz, 3H), 7.10 (d,  $J = 8.6$  Hz, 2H), 3.35 (s, 3H);  $^{13}\text{C NMR}$  (101 MHz,  $\text{CDCl}_3$ )  $\delta$  160.5, 160.3, 141.0, 133.1, 127.9, 122.6, 38.3. All recorded data were in accordance with those previously reported.

### 2-((4-methoxyphenyl)(methyl)amino)-2-oxoacetic acid (**7e**)<sup>1</sup>

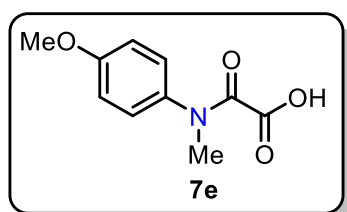

Prepared according to general procedure **B** using oxamic ester **11e** (0.500 g, 2.24 mmol), potassium hydroxide (0.189 g, 3.36 mL) in THF (30 mL) to afford **7e** as a brown solid (0.416 g, 89% yield).  $R_f = 0.23$  (1:4 MeOH:DCM);  $^1\text{H NMR}$  (300 MHz,  $\text{CDCl}_3$ )  $\delta$  8.12 (s, 1H),

7.15 (d,  $J = 8.9$  Hz, 2H), 6.89 (d,  $J = 8.9$  Hz, 2H), 3.81 (s, 3H), 3.31 (s, 3H);  $^{13}\text{C NMR}$  (101 MHz,  $\text{CDCl}_3$ )  $\delta$  162.4, 161.7, 159.6, 134.2, 127.7, 114.9, 55.6, 37.7. All recorded data were in accordance with those previously reported.

### 2-((3-methoxyphenyl)(methyl)amino)-2-oxoacetic acid (**7f**)

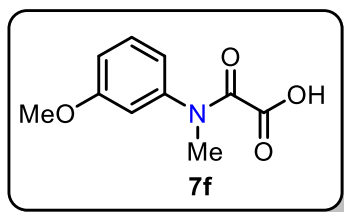

Prepared according to general procedure **B** using oxamic ester **11f** (0.511 g, 2.29 mmol), potassium hydroxide (0.193 g, 3.43 mL) in THF (30 mL) to afford **7f** as a colourless solid (0.422 g, 88 % yield).  $R_f = 0.25$  (1:4 MeOH:DCM); **M.P.** 40–42 °C; **IR** (film,  $\nu_{\max}/\text{cm}^{-1}$ ) 3390, 2936, 2481, 1923, 1588, 1651, 1485, 1265, 1219, 1112, 1034, 776, 691;  $^1\text{H NMR}$  (600 MHz,  $\text{CDCl}_3$ )  $\delta$  8.91 (s, 1H), 7.25 (t,  $J = 8.1$  Hz, 1H), 6.88 – 6.84 (m, 1H), 6.82–6.78 (m, 1H), 6.76 (t,  $J = 2.3$  Hz, 1H), 3.76 (s, 3H), 3.29 (s, 2H);  $^{13}\text{C NMR}$  (151 MHz,  $\text{CDCl}_3$ )  $\delta$  162.8, 162.2, 160.5, 142.5, 130.5, 118.3, 114.5, 111.9, 55.6, 37.0; **HRMS** (ESI<sup>+</sup>)  $m/z$ : [M + H] calcd for  $\text{C}_{10}\text{H}_{12}\text{NO}_4^+$  210.0761; found 210.0767.

### 2-((4-acetylphenyl)(methyl)amino)-2-oxoacetic acid (**7g**)

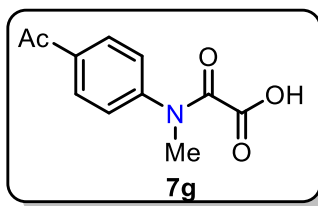

Prepared according to general procedure **B** using oxamic ester **11h** (0.403 g, 1.71 mmol), potassium hydroxide (0.144 g, 2.57 mmol) in THF (30 mL) to afford **7g** as a colourless solid (0.291 g, 77 % yield).  $R_f = 0.27$  (1:4 MeOH:DCM); **M.P.** 126–128 °C; **IR** (film,  $\nu_{\max}/\text{cm}^{-1}$ ) 3246, 2176, 1771, 1663, 1597, 1405, 1320, 1354, 1266, 1131, 1080, 754;  $^1\text{H NMR}$  (300 MHz,  $\text{CDCl}_3$ )  $\delta$  7.99 (d,  $J = 8.4$  Hz, 2H), 7.32 (d,  $J = 8.2$  Hz, 2H), 3.39 (s, 3H), 2.61 (s, 3H);  $^{13}\text{C NMR}$  (75 MHz,  $\text{CDCl}_3$ )  $\delta$  197.6, 161.6, 161.1, 145.9, 136.7, 130.1, 126.0, 37.5, 26.8; **HRMS** (ESI<sup>+</sup>)  $m/z$ : [M + H] calcd for  $\text{C}_{11}\text{H}_{12}\text{NO}_4^+$  222.0761; found 222.0774.

### 2-(methyl(4-nitrophenyl)amino)-2-oxoacetic acid (**7h**)<sup>9</sup>

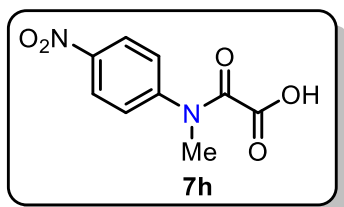

Prepared according to general procedure **B** using oxamic ester **11i** (0.500 g, 2.01 mmol), potassium hydroxide (0.178 g, 3.15 mL) in THF (30 mL) to afford **7h** as a brown solid (0.237 g, 53 % yield).  $R_f = 0.15$  (1:4 MeOH:DCM); **M.P.** 73–75 °C; **IR** (film,  $\nu_{\max}/\text{cm}^{-1}$ ) 2962, 1731, 1685, 1659, 1617, 1219, 1172, 1116, 984, 562;  $^1\text{H NMR}$  (300 MHz,  $\text{DMSO}-d_6$ )  $\delta$  8.28 (d,  $J = 8.4$  Hz, 2H), 7.61 (d,  $J = 8.4$  Hz, 2H), 3.32 (s, 3H);  $^{13}\text{C NMR}$  (75 MHz,  $\text{DMSO}-d_6$ )  $\delta$  172.3, 164.1, 162.7, 161.1, 126.5, 125.0, 21.3.



### 2-((4-cyanophenyl)(methyl)amino)-2-oxoacetic acid (7i)

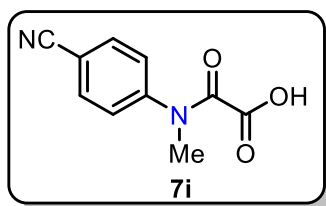

Prepared according to general procedure **B** using **11j** (0.505 g, 2.31 mmol), potassium hydroxide (0.195 g, 3.47 mL) in THF (30 mL) to afford **7i** as a colourless solid (0.336 g, 71% yield).  $R_f = 0.29$  (1:4 MeOH:DCM); **M.P.** 144–146 °C; **IR** (film,  $\nu_{\max}/\text{cm}^{-1}$ ), 2924, 2229, 1748, 1625, 1593, 1503, 1405, 1196, 1119, 851, 703, 572;  **$^1\text{H NMR}$**  (600 MHz, DMSO- $d_6$ )  $\delta$  7.92 (d,  $J = 8.5$  Hz, 2H), 7.55 (d,  $J = 8.5$  Hz, 2H), 3.30 (s, 3H);  **$^{13}\text{C NMR}$**  (151 MHz, DMSO- $d_6$ )  $\delta$  163.8, 162.4, 160.9, 145.5, 133.4, 126.3, 118.1, 35.0.

4

### 2-((3,5-difluorophenyl)(methyl)amino)-2-oxoacetic acid (7j)

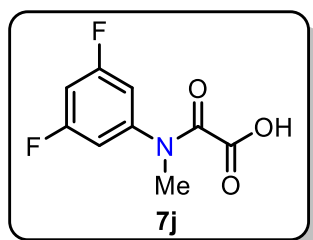

Prepared according to general procedure **B** using **11k** (0.500 g, 2.18 mmol), potassium hydroxide (0.183 g, 3.27 mL) in THF (30 mL) to afford **7j** as a yellow oil (0.401 g, 86% yield).  $R_f = 0.30$  (1:4 MeOH:DCM); **IR** (film,  $\nu_{\max}/\text{cm}^{-1}$ ) 3439, 3085, 2925, 1905, 1658, 1605, 1451, 1275, 1218, 1120, 989, 852, 681, 506;  **$^{19}\text{F NMR}$**  (377 MHz,  $\text{CDCl}_3$ )  $\delta$  -106.94 (d,  $J = 14.5$  Hz), -107.18 (d,  $J = 14.5$  Hz);  **$^1\text{H NMR}$**  (300 MHz,  $\text{CDCl}_3$ )  $\delta$  9.70 (s, 1H), 6.86–6.68 (m, 3H), 3.31 (s, 3H);  **$^{13}\text{C NMR}$**  (101 MHz,  $\text{CDCl}_3$ )  $\delta$  163.2 (dd,  $J_{\text{C-F}} = 250.8, 14.0$  Hz), 162.9 (d,  $J_{\text{C-F}} = 48.7$  Hz), 162.2, 143.9 (q,  $J_{\text{C-F}} = 11.8$  Hz), 107.6 (dd,  $J_{\text{C-F}} = 46.7, 17.3$  Hz), 103.2 (dt,  $J_{\text{C-F}} = 208.5, 23.9$  Hz), 36.9; **HRMS** (ESI<sup>+</sup>)  $m/z$ : [M + H] calcd for  $\text{C}_9\text{H}_8\text{F}_2\text{NO}_3^+$  216.0467; found 216.0473.

### 2-((3,4-dichlorophenyl)(methyl)amino)-2-oxoacetic acid (7k)

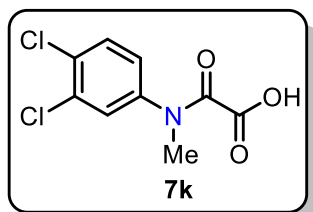

Prepared according to general procedure **B** using **11l** (0.500 g, 1.91 mmol), potassium hydroxide (0.161 g, 2.86 mL) in THF (30 mL) to afford **7k** as a white solid (0.468 g, 99% yield).  $R_f = 0.47$  (1:4 MeOH:DCM); **M.P.** 67–69 °C; **IR** (film,  $\nu_{\max}/\text{cm}^{-1}$ ) 3948, 2925, 2525, 1941, 1722, 1634, 1548, 1466, 1245, 1030, 1113, 601, 561,  **$^1\text{H NMR}$**  (600 MHz,  $\text{CDCl}_3$ )  $\delta$  7.50–7.45 (m, 1H), 7.38–7.33 (m, 1H), 7.11–7.06 (m, 1H), 3.35 (s, 3H);  **$^{13}\text{C NMR}$**  (101 MHz,  $\text{CDCl}_3$ )  $\delta$  160.7, 160.7, 141.1, 133.7, 133.2, 131.5, 128.3, 125.71 38.1; **HRMS** (ESI<sup>+</sup>)  $m/z$ : [M + H] calcd for  $\text{C}_9\text{H}_8\text{Cl}_2\text{NO}_3^+$  247.9876; found 247.9882.

### 2-((4-bromo-3,5-difluorophenyl)(methyl)amino)-2-oxoacetic acid (**7l**)

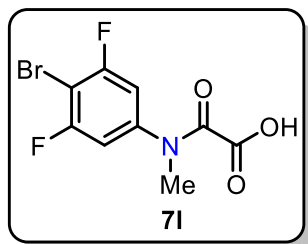

Prepared according to general procedure **B** using **11m** (0.400 g, 1.30 mmol), potassium hydroxide (0.109 g, 1.95 mL) in THF (30 mL) to afford **7l** as a white solid (0.340 g, 89% yield).  $R_f = 0.30$  (1:4 MeOH:DCM); IR (film,  $\nu_{\max}/\text{cm}^{-1}$ ) 3385, 2923, 1891, 1655, 1595, 1472, 1425, 1283, 1223, 1028, 652, 581, 512; **M.P.** 84–86 °C;  $^{19}\text{F}$  NMR (377

MHz,  $\text{CDCl}_3$ )  $\delta$  -101.90;  $^1\text{H}$  NMR (300 MHz,  $\text{CDCl}_3$ )  $\delta$  9.00 (s, 1H), 6.90 (d,  $J = 7.1$  Hz, 2H), 3.33 (s, 3H);  $^{13}\text{C}$  NMR (75 MHz,  $\text{CDCl}_3$ )  $\delta$  161.5, 161.1, 160.3 (dd,  $J_{\text{C-F}} = 251.3, 5.7$  Hz), 142.1 (t,  $J_{\text{C-F}} = 11.4$  Hz), 110.5 (d,  $J_{\text{C-F}} = 26.4$  Hz), 98.9 (t,  $J_{\text{C-F}} = 24.5$  Hz), 37.6; **HRMS** (ESI<sup>+</sup>)  $m/z$ : [M + H] calcd for  $\text{C}_9\text{H}_7\text{BrF}_2\text{NO}_3^+$  293.9572; found 297.9517.

### 2-(benzyl(phenyl)amino)-2-oxoacetic acid (**7n**)<sup>3</sup>

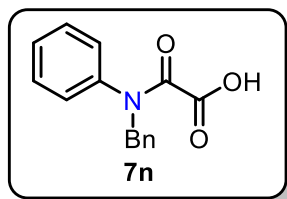

Prepared according to general procedure **B** using **11o** (0.504 g, 1.87 mmol), potassium hydroxide (0.158 g, 2.80 mL) in THF (30 mL) to afford **7n** as a brown oil (0.413 g, 87 % yield).  $R_f = 0.11$  (1:4 MeOH:DCM);  $^1\text{H}$  NMR (300 MHz,  $\text{DMSO-}d_6$ )  $\delta$  7.45–7.08 (m, 10H), 4.94 (s, 2H);  $^{13}\text{C}$  NMR

(151 MHz,  $\text{CDCl}_3$ )  $\delta$  162.1, 161.2, 139.8, 135.4, 129.4, 128.8, 128.7, 128.6, 127.4, 127.4, 53.5. All recorded data were in accordance with those previously reported.

### 2-(benzyl(phenyl)amino)-2-oxoacetic acid (**7o**)<sup>4</sup>

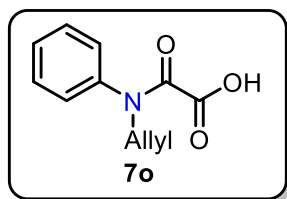

To a stirred solution of *N*-Allylaniline (1.00 g, 7.51 mmol) in THF (20 mL) at -78 °C; oxalyl chloride (3.20 mL, 37.57 mmol) was syringed dropwise slowly over ten minutes, reaction mixture was left to stir at that temperature to which it was allowed to slowly warm to room temperature overnight. The resultant reaction mixture was cooled to 0 °C and mixture was then diluted with an equivalent amount of 2.5M NaOH and EtOAc. The layers were separated, and the aqueous layer was washed with EtOAc (x2) before being acidified to pH ~2-3 by the dropwise addition of 6M aqueous HCl. Thereafter, the aqueous layer was reextracted with EtOAc (x3), the combined organic extracts dried over  $\text{MgSO}_4$  and concentrated in vacuo to afford **7o** as a

colourless gum (1.12 g, 73% yield).  $R_f = 0.5$  (1:4 MeOH:DCM);  $^1\text{H NMR}$  (300 MHz,  $\text{CDCl}_3$ )  $\delta$  9.36 (s, 1H), 7.45–7.31 (m, 3H), 7.24–7.16 (m, 2H), 5.92–5.74 (m, 1H), 5.24–5.10 (m, 2H), 4.34 (d,  $J = 6.3$  Hz, 2H);  $^{13}\text{C NMR}$  (75 MHz,  $\text{CDCl}_3$ )  $\delta$  162.6, 161.5, 139.9, 131.1, 129.7, 128.9, 127.2, 119.5, 52.5. All recorded data were in accordance with those previously reported.

### 2-(diphenylamino)-2-oxoacetic acid (**7p**)

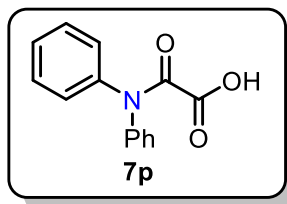

Prepared according to general procedure **B** using **11p** (0.502 g, 1.96 mmol), Potassium hydroxide (0.166 g, 0.294 mmol) in THF (30 mL) to afford **7p** as a white solid (0.468 g, 98% yield).  $R_f = 0.27$  (1:4 MeOH:DCM); **M.P.** 153–155 °C; **IR** (film,  $\nu_{\text{max}}/\text{cm}^{-1}$ ) 2864, 2559, 1747, 1620, 1588, 1438, 1491, 1221, 758, 692, 587;  $^1\text{H NMR}$  (300 MHz,  $\text{DMSO}-d_6$ )  $\delta$  7.49–7.24 (m, 10H);  $^{13}\text{C NMR}$  (75 MHz,  $\text{DMSO}-d_6$ )  $\delta$  164.1, 162.4, 140.6, 140.5, 129.7, 129.3, 128.5, 128.1, 127.2, 126.5; **HRMS** (ESI<sup>+</sup>)  $m/z$ : [M + H] calcd for  $\text{C}_{14}\text{H}_{12}\text{NO}_3^+$  242.0812; found 242.0815.

### 2-(indolin-1-yl)-2-oxoacetic acid (**7q**)

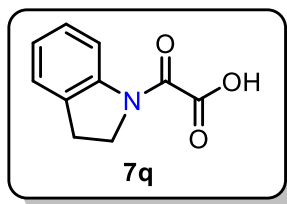

Prepared according to general procedure **B** using **11q** (0.512 g, 2.49 mmol), potassium hydroxide (0.210 g, 3.74 mL) in THF to afford **7q** as a white solid (0.424 g, 89% yield).  $R_f = 0.33$  (1:4 MeOH:DCM); **M.P.** 126–128 °C; **IR** (film,  $\nu_{\text{max}}/\text{cm}^{-1}$ ) 3229, 2930, 1766, 1640, 1366, 1290, 1181, 753, 708, 646;  $^1\text{H NMR}$  (600 MHz,  $\text{CDCl}_3$ )  $\delta$  8.25 (d,  $J = 8.2$  Hz, 1H), 7.28 (t,  $J = 7.4$  Hz, 2H), 7.18 (t,  $J = 7.4$  Hz, 1H), 4.66 (t,  $J = 8.2$  Hz, 2H), 3.27 (t,  $J = 8.2$  Hz, 2H);  $^{13}\text{C NMR}$  (151 MHz,  $\text{CDCl}_3$ )  $\delta$  159.2, 155.9, 142.0, 132.9, 127.9, 126.5, 125.2, 118.7, 50.6, 28.8; **HRMS** (ESI<sup>+</sup>)  $m/z$ : [M + H] calcd for  $\text{C}_{10}\text{H}_{10}\text{NO}_3^+$  192.0655; found 192.0665.

### 2-(6-methoxy-3,4-dihydroquinolin-1(2H)-yl)-2-oxoacetic acid (**7r**)

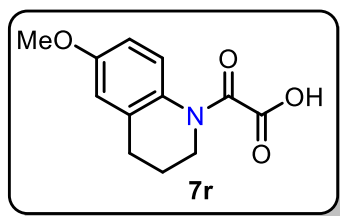

Prepared according to general procedure **B** using **11r** (0.500 g, 2.00 mmol), potassium hydroxide (1.67 g, 3.0 mL) in THF (30 mL) to afford **7r** as a brown solid (0.420 g, 89 % yield).  $R_f = 0.18$  (1:4 MeOH:DCM); **M.P.** 124–126 °C; **IR** (film,  $\nu_{\text{max}}/\text{cm}^{-1}$ ) 2922, 2848,

2434, 1729, 1572, 1499, 1466, 1427, 1272, 1232, 1180, 801, 411;  $^1\text{H NMR}$  (300 MHz,  $\text{DMSO-}d_6$ )  $\delta$  7.02 (d,  $J = 8.7$  Hz, 1H), 6.86 – 6.72 (m, 2H), 3.76 – 3.54 (m, 5H), 2.82 (t,  $J = 6.8$  Hz, 1H), 2.70 (t,  $J = 6.8$  Hz, 1H), 1.98–1.79 (m, 2H);  $^{13}\text{C NMR}$  (101 MHz,  $\text{DMSO-}d_6$ )  $\delta$  165.3, 157.6, 125.0, 122.7, 114.4, 114.0, 112.3, 112.1, 46.2, 42.0, 26.8, 23.2; **HRMS** (ESI+)  $m/z$ :  $[\text{M} + \text{H}]$  calcd for  $\text{C}_{12}\text{H}_{14}\text{NO}_4^+$  236.0917; found 236.0920

### 2-oxo-2-(phenylamino)acetic acid (**7ud**)<sup>1</sup>

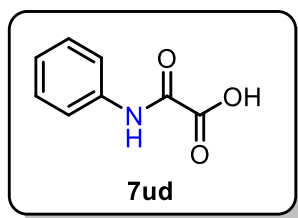

Prepared according to general procedure **B** using **11ud** (0.510 g, 2.85 mmol), potassium hydroxide (0.240 g, 4.23 mL) in THF (30 mL) to afford **7ud** as a white solid (0.445g, 95% yield).  $R_f = 0.39$  (1:4 MeOH:DCM); **M.P.** 141–143 °C; **IR** (film,  $\nu_{\text{max}}/\text{cm}^{-1}$ ) 3299, 2938, 1762, 1684, 1543, 1347, 1303, 1206, 747, 690;  $^1\text{H NMR}$  (300 MHz,  $\text{CDCl}_3$ )  $\delta$  8.99 (s, 1H), 7.61 (d,  $J = 8.1$  Hz, 2H), 7.40 (t,  $J = 7.9$  Hz, 2H), 7.22 (d,  $J = 8.1$  Hz, 1H);  $^{13}\text{C NMR}$  (101 MHz,  $\text{CDCl}_3$ )  $\delta$  160.2, 152.0, 135.6, 129.6, 126.5, 120.1. All recorded data were in accordance with those previously reported.

## 15. Characterization data for quinoline-2-ones (**10**).

### 1,4-Dimethylquinolin-2(1H)-one (**10a**)<sup>5</sup>

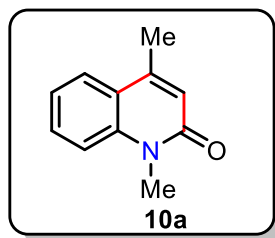

Prepared using general Procedure **C** using **7a** (0.140 g, 0.78 mmol), methacrylic acid (0.201 g, 2.34 mmol),  $\text{AgNO}_3$  (0.66 g, 0.39 mmol) and  $\text{K}_2\text{S}_2\text{O}_8$  (0.632 g, 0.234 mmol). Chromatography on silica gel with EtOAc/Petroleum ether (10–40%) afforded **10a** as a white solid (0.081 g, 60% yield).

Prepared using general Procedure **D** using **7a** (0.100 g, 0.558 mmol), methacrylic acid (0.141 g, 1.67 mmol),  $\text{AgNO}_3$  (0.043 g, 0.027 mmol), 4-CzIPN (0.009 g, 0.011 mmol) and  $\text{K}_2\text{S}_2\text{O}_8$  (0.453 g, 1.67 mmol). Chromatography on silica gel with EtOAc/Petroleum ether (10–40%) afforded **10a** as a white solid (0.056 g, 58% yield).

$R_f = 0.18$  (2:3 EtOAc:Petroleum ether).  $^1\text{H NMR}$  (300 MHz,  $\text{CDCl}_3$ )  $\delta$  7.65 (dd,  $J = 8.0, 1.5$  Hz, 1H), 7.53 (t,  $J = 8.6$  Hz, 1H), 7.31 (d,  $J = 8.6$  Hz, 1H), 7.22 (t,  $J = 8.1$  Hz, 1H), 6.55 (s, 1H), 3.65 (s, 3H),

2.41 (d,  $J = 1.2$  Hz, 3H);  $^{13}\text{C NMR}$  (75 MHz,  $\text{CDCl}_3$ )  $\delta$  162.1, 146.4, 139.7, 130.4, 125.1, 121.9, 121.3, 121.0, 114.4, 29.2, 19.0. All data were in accordance with those previously reported.

#### 6-Fluoro-1,4-dimethylquinolin-2(1H)-one (10b)<sup>5</sup>

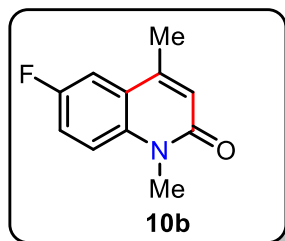

Prepared using general Procedure **C** using **7b** (0.132 g, 0.669 mmol), methacrylic acid (0.169g, 2.01 mmol),  $\text{AgNO}_3$  (0.055 g, 0.335 mmol) and  $\text{K}_2\text{S}_2\text{O}_8$  (0.543 g, 2.01 mmol). Chromatography on silica gel with EtOAc/Petroleum ether (10–15%) afforded **10b** as a white solid (0.071 g, 56% yield).  $R_f = 0.23$  (2:3 Pet Ether:Petroleum ether);  $^1\text{H NMR}$  (300 MHz,  $\text{CDCl}_3$ )  $\delta$  7.38–7.27 (m, 3H), 6.63 (s, 1H), 3.69 (s, 3H), 2.42 (d, 3H);  $^{13}\text{C NMR}$  (101 MHz,  $\text{CDCl}_3$ )  $\delta$  161.9, 157.8 (d,  $J_{\text{C-F}} = 241.7$  Hz), 145.6 (d,  $J = 3.2$  Hz), 136.5, 122.4 (d,  $J_{\text{C-F}} = 8.0$  Hz), 122.4, 118.1 (d,  $J_{\text{C-F}} = 23.6$  Hz), 116.1 (d,  $J_{\text{C-F}} = 8.1$  Hz), 110.8 (d,  $J_{\text{C-F}} = 22.9$  Hz), 29.8, 19.1. All data were in accordance with those previously reported.

#### 6-Chloro-1,4-dimethylquinolin-2(1H)-one (10c)<sup>5</sup>

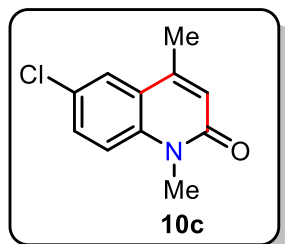

Prepared using general Procedure **C** using **7c** (0.150 g, 0.702 mmol), methacrylic acid (0.181 g, 2.11 mmol),  $\text{AgNO}_3$  (0.060 g, 0.351 mmol) and  $\text{K}_2\text{S}_2\text{O}_8$  (0.570 g, 2.11 mmol). Chromatography on silica gel with EtOAc/Petroleum ether (15–30%) afforded **10c** as a white solid (0.120 g, 82% yield).

$R_f = 0.56$  (3:7 EtOAc:Petroleum Ether);  $^1\text{H NMR}$  (300 MHz,  $\text{CDCl}_3$ )  $\delta$  7.60 (d,  $J = 2.4$  Hz, 1H), 7.47 (dd,  $J = 9.0, 2.4$  Hz, 1H), 7.25 (d,  $J = 8.9$  Hz, 1H), 6.58 (s, 1H), 3.64 (s, 3H), 2.40 (s, 3H);  $^{13}\text{C NMR}$  (101 MHz,  $\text{CDCl}_3$ )  $\delta$  161.8, 145.4, 138.4, 130.4, 127.6, 124.7, 122.6, 122.3, 115.9, 29.4, 18.9. All data were in accordance with those previously reported.

### 6-Bromo-1,4-dimethylquinolin-2(1H)-one (**10d**)<sup>6</sup>

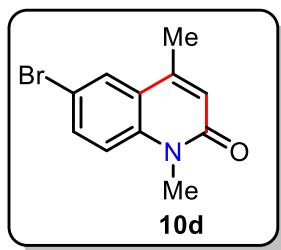

Prepared using general Procedure **C** using **7d** (0.147 g, 0.570 mmol), methacrylic acid (0.147 g, 1.77 mmol), AgNO<sub>3</sub> (0.048 g, 0.285 mmol) and K<sub>2</sub>S<sub>2</sub>O<sub>8</sub> (0.462 g, 1.71 mmol). Chromatography on silica gel with EtOAc/Petroleum ether (5–30%) afforded **10d** as a colorless solid (0.079 g, 55% yield).

Prepared using general Procedure **D** using **7d** (0.097 g, 0.376 mmol), methacrylic acid (0.097 g, 1.13 mmol), AgNO<sub>3</sub> (0.032 g, 0.188 mmol), 4-CzIPN (0.006 g, 0.008 mmol) and K<sub>2</sub>S<sub>2</sub>O<sub>8</sub> (0.305 g, 1.13 mmol). Chromatography on silica gel with EtOAc/Petroleum ether (5–30%) afforded **10d** as colorless solid (0.68 g, 72% yield);

R<sub>f</sub> = 0.21 (3:7 EtOAc:Petroleum ether); <sup>1</sup>H NMR (300 MHz, CDCl<sub>3</sub>) δ 7.77 (d, *J* = 2.2 Hz, 1H), 7.62 (dd, *J* = 9.0, 2.2 Hz, 1H), 7.22 (d, *J* = 9.0 Hz, 1H), 6.59 (s, 1H), 3.66 (s, 3H), 2.42 (d, *J* = 1.0 Hz, 3H); <sup>13</sup>C NMR (101 MHz, CDCl<sub>3</sub>) δ 161.9, 145.4, 138.8, 133.2, 127.8, 123.1, 122.3, 116.2, 115.1, 29.5, 19.0. All data were in accordance with those previously reported.

### 6-Methoxy-1,4-dimethylquinolin-2(1H)-one (**10e**)<sup>5</sup>

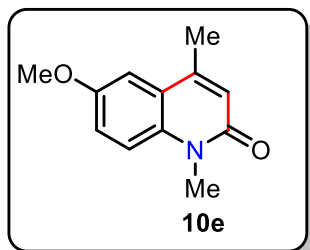

Prepared using general Procedure **C** using **7e** (0.143 g, 0.680 mmol), methacrylic acid (0.176 g, 2.05 mmol), AgNO<sub>3</sub> (0.058 g, 0.340 mmol) and K<sub>2</sub>S<sub>2</sub>O<sub>8</sub> (0.554 g, 2.05 mmol). Chromatography on silica gel with EtOAc/Petroleum ether (40–70%) afforded **10e** as a white solid (0.105 g, 76% yield).

Prepared using general Procedure **D** using **7e** (0.100 g, 0.478 mmol), methacrylic acid (0.123 g, 1.43 mmol), AgNO<sub>3</sub> (0.41 g, 0.239 mmol), 4-CzIPN (0.007 g, 0.009 mmol) and K<sub>2</sub>S<sub>2</sub>O<sub>8</sub> (0.388 g, 1.43 mmol). Chromatography on silica gel with EtOAc/Petroleum ether (40–70%) afforded **10e** as a colorless solid (0.073 g, 75% yield).

R<sub>f</sub> = 0.23 (4:1 EtOAc:Petroleum ether); <sup>1</sup>H NMR (300 MHz, CDCl<sub>3</sub>) δ 7.30 (d, *J* = 9.1 Hz, 1H), 7.17 (dd, *J* = 9.1, 2.8 Hz, 1H), 7.11 (d, *J* = 2.9 Hz, 1H), 6.60 (s, 1H), 3.88 (s, 3H), 3.68 (s, 3H), 2.43 (d, *J* = 1.2 Hz, 3H); <sup>13</sup>C NMR (101 MHz, CDCl<sub>3</sub>) δ 162.4, 161.7, 159.6, 134.7, 134.2, 127.7, 126.7, 121.7, 114.9, 55.6, 37.7, 17.4. All data were in accordance with those previously reported.

### 7-Methoxy-1,4-dimethylquinolin-2(1H)-one (10f)<sup>5</sup>

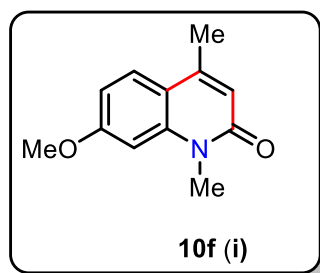

Prepared using general Procedure **C** using **7f** (0.197 g, 1.01 mmol), methacrylic acid (0.261 g, 3.03 mmol), AgNO<sub>3</sub> (0.086 g, 0.505 mmol) and K<sub>2</sub>S<sub>2</sub>O<sub>8</sub> (0.819 g, 0.303 mmol). Chromatography on silica gel with EtOAc/Petroleum ether (0–5%) afforded **10f** a white solid (0.032 g, 16 % yield).

**10f (i)**: obtained as a white (0.022 g, 23% yield);  $R_f = 0.31$  (4:1 EtOAc:Petroleum ether); <sup>1</sup>H NMR (300 MHz, DMSO-*d*<sub>6</sub>) δ 7.69 (d, *J* = 8.7 Hz, 1H), 6.95–6.87 (m, 2H), 6.34 (d, *J* = 1.3 Hz, 1H), 3.89 (s, 3H), 3.57 (s, 3H), 2.38 (d, *J* = 1.3 Hz, 3H); <sup>13</sup>C NMR (151 MHz, DMSO-*d*<sub>6</sub>) δ 161.3, 161.2, 146.3, 141.2, 126.8, 117.3, 114.6, 109.4, 98.9, 55.5, 28.8, 18.4. All data were in accordance with those previously reported.

### 7-Methoxy-1,4-dimethylquinolin-2(1H)-one & 5-methoxy-1,4-dimethylquinolin-2(1H)-one (10f)<sup>5</sup>

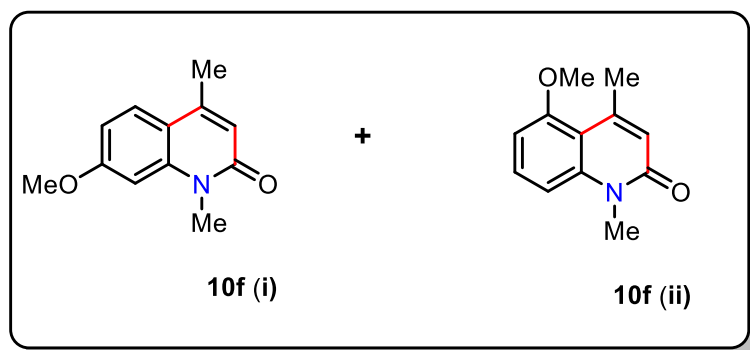

Prepared using general Procedure **D** using **7f** (0.100 g, 0.478 mmol), methacrylic acid (0.123 g, 1.43 mmol), AgNO<sub>3</sub> (0.041 g, 0.239 mmol), 4-CzIPN (0.007 g, 0.009 mmol) and K<sub>2</sub>S<sub>2</sub>O<sub>8</sub> (0.388 g, 1.43

mmol). Chromatography on silica gel with EtOAc/Petroleum ether (0–5%) afforded **10f** as a mixture of 1:1.5 separable regioisomers (0.055 g, 57% yield).

**10f (i)**: obtained as a white (0.022 g, 23% yield);  $R_f = 0.31$  (4:1 EtOAc:Petroleum ether); <sup>1</sup>H NMR (300 MHz, DMSO-*d*<sub>6</sub>) δ 7.69 (d, *J* = 8.7 Hz, 1H), 6.95 – 6.87 (m, 2H), 6.34 (d, *J* = 1.3 Hz, 1H), 3.89 (s, 3H), 3.57 (s, 3H), 2.38 (d, *J* = 1.3 Hz, 3H); <sup>13</sup>C NMR (151 MHz, DMSO-*d*<sub>6</sub>) δ 161.3, 161.2, 146.3, 141.2, 126.8, 117.3, 114.6, 109.4, 98.9, 55.5, 28.8, 18.4. All data were in accordance with those previously reported.

**10f(ii)**: obtained as a white (0.033 g, 34% yield);  $R_f = 0.43$  (4:1 EtOAc:Petroleum ether); **M.P.** 83–85 °C; **IR** (film,  $\nu_{\max}/\text{cm}^{-1}$ ) 3421, 2923, 2851, 1726, 1645, 1588, 1452, 1375, 1319, 1231, 1063, 1034, 856, 734  **$^1\text{H NMR}$**  (300 MHz,  $\text{DMSO-}d_6$ )  $\delta$  7.53 (t,  $J = 8.4$  Hz, 1H), 7.09 (d,  $J = 9.5$  Hz, 1H), 6.86 (d,  $J = 8.6$  Hz, 1H), 6.34 (d,  $J = 1.3$  Hz, 1H), 3.86 (s, 3H), 3.55 (s, 3H), 2.55 (d,  $J = 1.3$  Hz, 3H);  **$^{13}\text{C NMR}$**  (151 MHz,  $\text{DMSO-}d_6$ )  $\delta$  160.4, 158.3, 146.9, 141.5, 131.2, 120.4, 111.0, 107.7, 104.6, 55.9, 29.4, 24.5; **HRMS** ( $\text{ESI}^+$ )  $m/z$ :  $[\text{M} + \text{H}]$  calcd for  $\text{C}_{12}\text{H}_{14}\text{NO}_2^+$  204.1019; found 204.1030.

### 6-Acetyl-1,4-dimethylquinolin-2(1H)-one (10g)<sup>6</sup>

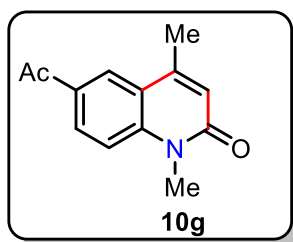

Prepared using general Procedure **C** using **7g** (0.165 g, 0.75 mmol), methacrylic acid (0.189 g, 2.24 mmol),  $\text{AgNO}_3$  (0.63 g, 0.373 mmol) and  $\text{K}_2\text{S}_2\text{O}_8$  (0.605 g, 2.24 mmol). Chromatography on silica gel with EtOAc/Petroleum ether (20–60%) afforded **10g** as a white solid (0.072 g, 72% yield).  $R_f = 0.48$  (2:3 EtOAc:Petroleum ether);  **$^1\text{H NMR}$**  (300 MHz,  $\text{CDCl}_3$ )  $\delta$  8.26 (d,  $J = 2.0$  Hz, 1H), 8.10 (dd,  $J = 8.8, 2.0$  Hz, 1H), 7.37 (d,  $J = 8.8$  Hz, 1H), 6.60 (s, 1H), 3.67 (s, 3H), 2.63 (s, 3H), 2.48 (s, 3H);  **$^{13}\text{C NMR}$**  (101 MHz,  $\text{CDCl}_3$ )  $\delta$  196.7, 162.1, 147.0, 142.9, 130.8, 130.3, 126.1, 121.8, 121.0, 114.5, 29.6, 26.6, 19.0. All data were in accordance with those previously reported.

### 1,4-Dimethyl-6-nitroquinolin-2(1H)-one (10h)

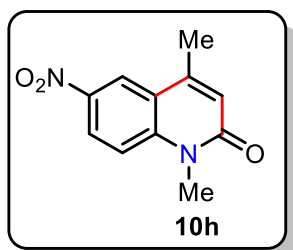

Prepared using general Procedure **C** using **7h** (0.114 g, 0.509 mmol), methacrylic acid (0.131 g, 1.53 mmol),  $\text{AgNO}_3$  (0.043 g, 2.55 mmol) and  $\text{K}_2\text{S}_2\text{O}_8$  (0.413 g, 1.53 mmol). Chromatography on silica gel with EtOAc/Petroleum ether (15–40%) afforded **10h** as a yellow solid (0.067 g, 60% yield).  $R_f = 0.63$  (4:1 EtOAc: Petroleum ether); **M.P.** 220–222 °C; **IR** (film,  $\nu_{\max}/\text{cm}^{-1}$ ) 2925, 1662, 1601, 1517, 1337, 1298, 1115, 908, 738;  **$^1\text{H NMR}$**  (300 MHz,  $\text{CDCl}_3$ )  $\delta$  8.60 (d,  $J = 2.6$  Hz, 1H), 8.41 (dd,  $J = 9.3, 2.6$  Hz, 1H), 7.46 (d,  $J = 9.3$  Hz, 1H), 6.71 (s, 1H), 3.75 (s, 3H), 2.54 (d,  $J = 1.2$  Hz, 3H);  **$^{13}\text{C NMR}$**  (101 MHz,  $\text{CDCl}_3$ )  $\delta$  161.8, 146.4, 144.1, 142.1, 125.3, 123.1, 121.5, 121.3, 115.1, 30.0, 19.1; **HRMS** ( $\text{ESI}^+$ )  $m/z$ :  $[\text{M} + \text{H}]$  calcd for  $\text{C}_{11}\text{H}_{11}\text{N}_2\text{O}_3^+$  219.0764; found 219.0775.



### 1,4-Dimethyl-2-oxo-1,2-dihydroquinoline-6-carbonitrile (10i)

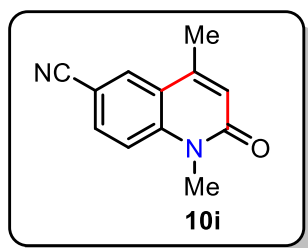

Prepared using general Procedure **C** using **7i** (0.135 g, 0.66 mmol), methacrylic acid (0.171 g, 1.98 mmol), AgNO<sub>3</sub> (0.056 g, 0.33 mmol) and K<sub>2</sub>S<sub>2</sub>O<sub>8</sub> (0.535 g, 1.98 mmol). Chromatography on silica gel with EtOAc/Petroleum ether (15–40%) afforded **10i** as a white solid (0.110 g, 84% yield). **R<sub>f</sub>** = 0.60 (4:1 EtOAc:Petroleum ether); **M.P.** 232–234 °C; **IR** (film,  $\nu_{\text{max}}/\text{cm}^{-1}$ ) 2932, 2216, 1668, 1584, 1546, 1301, 1065, 917, 813; **<sup>1</sup>H NMR** (300 MHz, CDCl<sub>3</sub>)  $\delta$  7.99 (d,  $J$  = 1.9 Hz, 1H), 7.79 (dd,  $J$  = 8.8, 1.9 Hz, 1H), 7.42 (d,  $J$  = 8.8 Hz, 1H), 6.66 (s, 1H), 3.70 (s, 3H), 2.47 (s, 3H); **<sup>13</sup>C NMR** (101 MHz, CDCl<sub>3</sub>)  $\delta$  161.7, 145.6, 142.6, 133.1, 130.1, 122.9, 121.7, 118.7, 115.39, 105.5, 29.6, 18.9; **HRMS** (ESI<sup>+</sup>)  $m/z$ : [M + H] calcd for C<sub>11</sub>H<sub>12</sub>N<sub>2</sub>O<sup>+</sup> 199.0866; found 199.0870.

### 5,7-Difluoro-1,4-dimethylquinolin-2(1H)-one (10j)

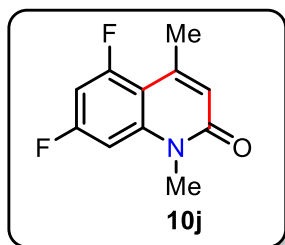

Prepared using general Procedure **C** using **7j** (0.205 g, 0.950 mmol), methacrylic acid (0.246 g, 2.86 mmol), AgNO<sub>3</sub> (0.081 g, 0.475 mmol) and K<sub>2</sub>S<sub>2</sub>O<sub>8</sub> (0.773 g, 2.86 mmol). Chromatography on silica gel with EtOAc/Petroleum ether (15–20%) afforded **10j** as a brown solid (0.090 g, 45% yield). **R<sub>f</sub>** = 0.41 (3:7 EtOAc:Petroleum ether); **M.P.** 89–91 °C; **IR** (film,  $\nu_{\text{max}}/\text{cm}^{-1}$ ) 3084, 1662, 1631, 1599, 1568, 1442, 1363, 1313, 1111, 1005; **<sup>19</sup>F NMR** (377 MHz, CDCl<sub>3</sub>)  $\delta$  -105.17 (d,  $J$  = 10.1 Hz), -105.74 (d,  $J$  = 10.1 Hz); **<sup>1</sup>H NMR** (300 MHz, CDCl<sub>3</sub>)  $\delta$  6.89–6.78 (m, 1H), 6.72–6.62 (m, 1H), 6.43 (s, 1H), 3.60 (s, 3H), 2.53 (d,  $J_{\text{H-F}}$  = 9.1 Hz, 3H); **<sup>13</sup>C NMR** (75 MHz, CDCl<sub>3</sub>)  $\delta$  164.1 (dd,  $J_{\text{C-F}}$  = 258.5, 14.25 Hz), 161.7, 160.7 (dd,  $J_{\text{C-F}}$  = 141.1, 13.9 Hz), 145.0 (dd,  $J_{\text{C-F}}$  = 3.6, 1.4 Hz), 142.7 (dd,  $J_{\text{C-F}}$  = 13.0, 8.7 Hz), 121.3 (d,  $J_{\text{C-F}}$  = 2.7 Hz), 108.0 (dd,  $J_{\text{C-F}}$  = 14.3, 3.1 Hz), 98.4 (dd,  $J_{\text{C-F}}$  = 27.5, 26.5 Hz), 97.8 (dd,  $J_{\text{C-F}}$  = 26.4, 3.9 Hz), 30.1, 22.9 (d,  $J_{\text{C-F}}$  = 12.9 Hz). **HRMS** (ESI<sup>+</sup>)  $m/z$ : [M + H] calcd for C<sub>11</sub>H<sub>10</sub>F<sub>2</sub>NO<sup>+</sup> 210.0725; found 210.0733.

### 6,7-dichloro-1,4-dimethylquinolin-2(1H)-one (10k)

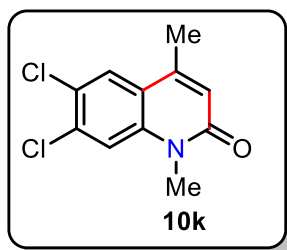

Prepared using general Procedure C using **7k** (0.145 g, 0.580 mmol), methacrylic acid (0.148 g, 1.75 mmol), AgNO<sub>3</sub> (0.049 g, 0.290 mmol) and K<sub>2</sub>S<sub>2</sub>O<sub>8</sub> (0.473 g, 1.75 mmol). Chromatography on silica gel with EtOAc/Petroleum ether (15–30%) afforded **10k** as a white solid (0.054 g, 42% yield). R<sub>f</sub> = 0.22 (2:3) EtOAc:Petroleum ether); M.P. 181–183 °C;

IR (film,  $\nu_{\text{max}}/\text{cm}^{-1}$ ) 2925, 1646, 1577, 1405, 1297, 1147, 1072, 855, 822, 542; 422; <sup>1</sup>H NMR (300 MHz, CDCl<sub>3</sub>)  $\delta$  7.70 (s, 1H), 7.42 (s, 1H), 6.58 (s, 1H), 3.63 (s, 3H), 2.41 (d,  $J$  = 1.2 Hz, 3H); <sup>13</sup>C NMR (75 MHz, CDCl<sub>3</sub>)  $\delta$  161.7, 145.1, 139.1, 134.1, 126.4, 126.0, 122.3, 121.2, 116.2, 29.6, 19.0; HRMS (ESI<sup>+</sup>)  $m/z$ : [M + H] calcd for C<sub>11</sub>H<sub>10</sub>Cl<sub>2</sub>NO 241.0134; found 242.0140.

### 6,7-dichloro-1,4-dimethylquinolin-2(1H)-one & 5,6-dichloro-1,4-dimethylquinolin-2(1H)-one (10k(i) & 10(ii))

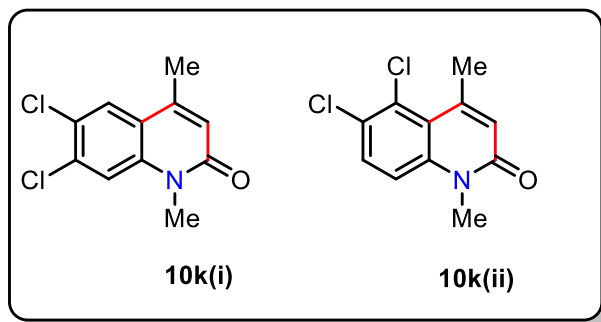

Prepared using general Procedure D using **7k** (0.100 g, 0.403 mmol), methacrylic acid (0.104 g, 1.21 mmol), AgNO<sub>3</sub> (0.034 g, 0.202 mmol), 4-CzIPN (0.006 g, 0.008 mmol) and K<sub>2</sub>S<sub>2</sub>O<sub>8</sub> (0.327 g, 1.21 mmol). Chromatography on silica gel with EtOAc/Petroleum ether (5– 35 %) afforded **10k** as a mixture of 1:1.1 separable regioisomers (0.052 g, 53% yield).

**10k(i)**: obtained as a white solid (0.027g); R<sub>f</sub> = 0.22 (2:3) EtOAc:Petroleum ether); M.P. 181–183 °C; IR (film,  $\nu_{\text{max}}/\text{cm}^{-1}$ ) 2925, 1646, 1577, 1405, 1297, 1147, 1072, 855, 822, 542; 422; <sup>1</sup>H NMR (300 MHz, CDCl<sub>3</sub>)  $\delta$  7.70 (s, 1H), 7.42 (s, 1H), 6.58 (s, 1H), 3.63 (s, 3H), 2.41 (d,  $J$  = 1.2 Hz, 3H); <sup>13</sup>C NMR (75 MHz, CDCl<sub>3</sub>)  $\delta$  161.7, 145.1, 139.1, 134.1, 126.4, 126.0, 122.3, 121.2, 116.2, 29.6, 19.0; HRMS (ESI<sup>+</sup>)  $m/z$ : [M + H] calcd for C<sub>11</sub>H<sub>10</sub>Cl<sub>2</sub>NO 241.0134; found 242.0140.

**10k(ii)**: obtained as a white solid (0.025g); R<sub>f</sub> = 0.74 (2:3) EtOAc:Petroleum ether); M.P. 162–164 °C; IR (film,  $\nu_{\text{max}}/\text{cm}^{-1}$ ) 2921, 1649, 1581, 1458, 1406, 1300, 1148, 1075, 882; <sup>1</sup>H NMR (300 MHz, CDCl<sub>3</sub>)  $\delta$  7.62 (d,  $J$  = 9.2 Hz, 1H), 7.27 (d,  $J$  = 9.2 Hz, 1H), 6.65 (s, 1H), 3.69 (s, 3H), 2.82 (s, 3H); <sup>13</sup>C

**NMR** (151 MHz, CDCl<sub>3</sub>)  $\delta$  161.0, 146.9, 140.9, 131.8, 131.0, 128.9, 125.7, 121.2, 114.6, 30.3, 26.5; **HRMS** (ESI<sup>+</sup>)  $m/z$ : [M + H] calcd for C<sub>11</sub>H<sub>10</sub>Cl<sub>2</sub>NO<sup>+</sup> 242.0134; found 242.0140.

### 6-Bromo-5,7-difluoro-1,4-dimethylquinolin-2(1H)-one (10l)

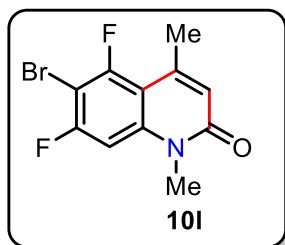

Prepared using general Procedure **C** using **7l** (0.139 g, 0.474 mmol), methacrylic acid (0.122 g, 1.42 mmol), AgNO<sub>3</sub> (0.040 g, 0.237 mmol) and K<sub>2</sub>S<sub>2</sub>O<sub>8</sub> (0.384 g, 1.42 mmol). Chromatography on silica gel with EtOAc/Petroleum ether (5–30%) afforded **10m** as a white solid (0.059 g, 43% yield).

Prepared using general Procedure **D** using **7l** (0.100 g, 0.341 mmol), methacrylic acid (0.086 g, 1.02 mmol), AgNO<sub>3</sub> (0.029 g, 0.171 mmol), 4-CzIPN (0.005 g, 0.007 mmol) and K<sub>2</sub>S<sub>2</sub>O<sub>8</sub> (0.277 g, 1.02 mmol). Chromatography on silica gel with EtOAc/Petroleum ether (5–30%) afforded **10m** as colorless solid (0.053 g, 54% yield). **R<sub>f</sub>** = 0.39 (3:7 EtOAc:Petroleum ether); **M.P.** 173–175 °C; **IR** (film,  $\nu_{\max}/\text{cm}^{-1}$ ) 3070, 1662, 1593, 1555, 1428, 1359, 1304, 1246, 1140, 1044, 862, 582; **<sup>19</sup>F NMR** (377 MHz, CDCl<sub>3</sub>)  $\delta$  -100.20 (d,  $J$  = 5.7 Hz), -100.68 (d,  $J$  = 5.7 Hz); **<sup>1</sup>H NMR** (300 MHz, CDCl<sub>3</sub>)  $\delta$  6.96 (dd,  $J$  = 10.3, 2.0 Hz, 1H), 6.48 (s, 1H), 3.62 (s, 3H), 2.56 (d,  $J_{\text{H-F}}$  = 8.2, Hz, 3H); **<sup>13</sup>C NMR** (101 MHz, CDCl<sub>3</sub>) 161.3,  $\delta$  160.7 (dd,  $J_{\text{(C-F)}}$  = 190.4, 6.2 Hz), 157.8 (dd,  $J_{\text{(C-F)}}$  = 202.6, 6.2 Hz), 144.5, 141.18 (dd,  $J_{\text{(C-F)}}$  = 12.3, 8.4 Hz), 122.3, 108.8 (dd,  $J_{\text{(C-F)}}$  = 15.3, 2.4 Hz), 98.37 (d,  $J_{\text{(C-F)}}$  = 27.5 Hz), 91.8 (t,  $J_{\text{(C-F)}}$  = 25.8 Hz), 30.1 (d,  $J_{\text{(C-F)}}$  = 3.9 Hz), 22.9 (d,  $J_{\text{(C-F)}}$  = 16.2 Hz); **HRMS** (ESI<sup>+</sup>)  $m/z$ : [M + H] calcd for C<sub>11</sub>H<sub>9</sub>BrF<sub>2</sub>NO<sup>+</sup> 287.9830; found 287.9839

### 1-Methyl-4-(trifluoromethyl)quinolin-2(1H)-one (10m)

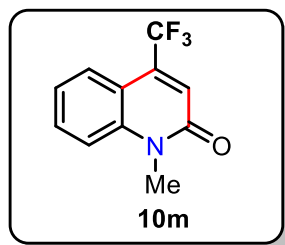

Prepared using general Procedure **C** using **7a** (0.141 g, 0.787 mmol), 2-(trifluoromethyl)acrylic acid (0.331 g, 0.236 mmol), AgNO<sub>3</sub> (0.065 g, 0.394 mmol) and K<sub>2</sub>S<sub>2</sub>O<sub>8</sub> (0.638 g, 0.236 mmol). Chromatography on silica gel with EtOAc/Petroleum ether (0–5%) afforded **10m** as a white solid (0.096 g, 54% yield).

Prepared using general Procedure **D** using **7a** (0.100 g, 0.558 mmol), 2-(trifluoromethyl)acrylic acid (0.234 g, 1.67 mmol), AgNO<sub>3</sub> (0.047 g, 0.279 mmol), 4-CzIPN (0.009 g, 0.011 mmol) and

K<sub>2</sub>S<sub>2</sub>O<sub>8</sub> (0.453 g, 1.67 mmol). Chromatography on silica gel with EtOAc/Petroleum ether (0–5%) afforded **10m** as colorless solid (0.107 g, 84% yield); **M.P.** 64–66 °C; **R<sub>f</sub>** = 0.34 (3:7 EtOAc:Petroleum ether); **IR** (film,  $\nu_{\text{max}}$ /cm<sup>-1</sup>) 2939, 1663, 1592, 1456, 1262, 1121, 1069, 949, 884, 754, 726; **<sup>19</sup>F NMR** (377 MHz, CDCl<sub>3</sub>)  $\delta$  -63.13; **<sup>1</sup>H NMR** (300 MHz, CDCl<sub>3</sub>)  $\delta$  7.87 (d,  $J$  = 8.2 Hz, 1H), 7.67 (t,  $J$  = 8.2 Hz, 1H), 7.46 (d,  $J$  = 9.1 Hz, 1H), 7.34 (t,  $J$  = 8.2 Hz, 1H), 7.12 (s, 1H), 3.76 (s, 3H); **<sup>13</sup>C NMR** (151 MHz, CDCl<sub>3</sub>)  $\delta$  160.7, 140.7, 137.1 (q,  $J$  = 31.6 Hz), 131.8, 125.9, 123.9, 123.0, 121.2, 115.3, 115.1, 30.0; **HRMS** (ESI<sup>+</sup>)  $m/z$ : [M + H] calcd for C<sub>11</sub>H<sub>9</sub>F<sub>3</sub>NO<sup>+</sup> 228.0631; found 228.0637.

### 1-Benzyl-4-methylquinolin-2(1H)-one (**10n**)<sup>5</sup>

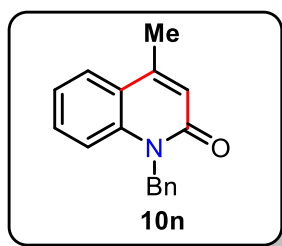

Prepared using general Procedure **C** using **7n** (0.102 g, 0.400 mmol), methacrylic acid (0.101 g, 1.20 mmol), AgNO<sub>3</sub> (0.033 g, 0.200 mmol) and K<sub>2</sub>S<sub>2</sub>O<sub>8</sub> (0.324 g, 1.20 mmol). Chromatography on silica gel with EtOAc/Petroleum ether (3–7%) afforded **10n** as a colorless solid (0.046 g, 46% yield). **R<sub>f</sub>** = 0.50 (1:4 EtOAc:Petroleum ether); **<sup>1</sup>H NMR** (300 MHz, CDCl<sub>3</sub>)  $\delta$  7.72 (dd,  $J$  = 8.0, 1.5 Hz, 1H), 7.47–7.38 (m, 1H), 7.30–7.18 (m, 7H), 6.71 (d,  $J$  = 1.3 Hz, 1H), 5.56 (s, 2H), 2.51 (d,  $J$  = 1.1 Hz, 3H); **<sup>13</sup>C NMR** (151 MHz, CDCl<sub>3</sub>)  $\delta$  162.3, 147.0, 139.2, 136.6, 130.4, 128.7, 127.2, 126.52, 125.2, 122.0, 121.7, 121.0, 115.3, 45.7, 19.1. All data were in accordance with those previously reported.

### 1-allyl-4-methylquinolin-2(1H)-one (**10o**)<sup>7</sup>

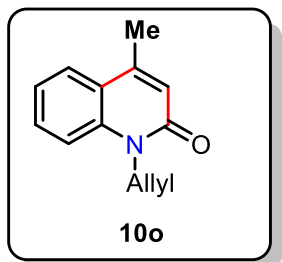

Prepared using general Procedure **C** using **7o** (0.156 g, 0.700 mmol), methacrylic acid (0.196 g, 2.28 mmol), AgNO<sub>3</sub> (0.065 g, 0.388 mmol) and K<sub>2</sub>S<sub>2</sub>O<sub>8</sub> (0.617 g, 2.28 mmol). Chromatography on silica gel with EtOAc/Petroleum ether (7–15%) afforded **10o** as a colorless gum (0.068 g, 45% yield). **R<sub>f</sub>** = 0.58 (1:4 EtOAc:Petroleum ether); **<sup>1</sup>H NMR** (300 MHz, CDCl<sub>3</sub>)  $\delta$  7.75 (d,  $J$  = 7.9 Hz, 1H), 7.57 (td,  $J$  = 7.9, 7.3, 1.4 Hz, 1H), 7.37 (d,  $J$  = 8.4 Hz, 1H), 7.30 (d,  $J$  = 7.2 Hz, 1H), 6.67 (s, 1H), 6.07 – 5.91 (m, 1H), 5.24 (d,  $J$  = 10.5 Hz, 1H), 5.11 (d,  $J$  = 17.3 Hz, 1H), 5.02 – 4.94 (m, 2H), 2.52 (s, 3H); **<sup>13</sup>C NMR** (75 MHz, CDCl<sub>3</sub>)  $\delta$  161.9, 147.0, 139.1, 132.0, 130.5,

125.3, 122.1, 121.7, 121.0, 116.9, 115.2, 44.4, 19.2; All data were in accordance with those previously reported.

#### 4-Methyl-1-phenylquinolin-2(1H)-one (**10p**)<sup>8</sup>

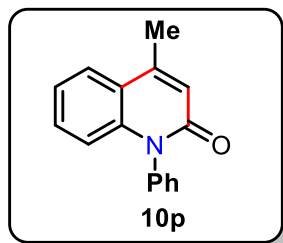

Prepared using general Procedure **C** using **7p** (0.144 g, 0.597 mmol), methacrylic acid (0.154 g, 1.79 mmol), AgNO<sub>3</sub> (0.051 g, 0.299 mmol) and K<sub>2</sub>S<sub>2</sub>O<sub>8</sub> (0.484 g, 1.79 mmol). Chromatography on silica gel with EtOAc/Petroleum ether (5–35%) afforded **10p** as a white solid (0.059 g, 42% yield).

Prepared using general Procedure **D** using **7p** (0.100 g, 0.415 mmol), methacrylic acid (0.107 g, 1.24 mmol), AgNO<sub>3</sub> (0.035 g, 0.208 mmol), 4-CzIPN (0.007 g, 0.008 mmol) and K<sub>2</sub>S<sub>2</sub>O<sub>8</sub> (0.336 g, 1.24 mmol). Chromatography on silica gel with EtOAc/Petroleum ether (5–35%) afforded **10p** as colorless solid (0.074 g, 76% yield).

R<sub>f</sub> = 0.41 (3:7 EtOAc:Petroleum ether); <sup>1</sup>H NMR (300 MHz, CDCl<sub>3</sub>) δ 7.74 (dd, *J* = 7.9, 1.6 Hz, 1H), 7.64–7.47 (m, 3H), 7.37–7.22 (m, 4H), 6.72–6.63 (m, 2H), 2.54 (d, *J* = 1.1 Hz, 3H); <sup>13</sup>C NMR (101 MHz, CDCl<sub>3</sub>) δ 162.3, 147.6, 141.0, 137.8, 130.3, 130.1, 129.1, 129.0, 124.9, 122.3, 121.5, 121.2, 116.4, 19.3. All data were in accordance with those previously reported.

#### 6-Methyl-1,2-dihydro-4H-pyrrolo[3,2,1-ij]quinolin-4-one (**10q**)

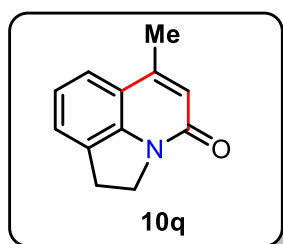

Prepared using general Procedure **C** using **7q** (0.149 g, 0.779 mmol), methacrylic acid (0.201 g, 0.234 mmol), AgNO<sub>3</sub> (0.066 g, 0.390 mmol) and K<sub>2</sub>S<sub>2</sub>O<sub>8</sub> (0.632 g, 2.34 mmol). Chromatography on silica gel with EtOAc/Petroleum ether (5–15%) afforded **10q** as a white solid (0.064 g, 44% yield). R<sub>f</sub> = 0.29 (3:7 EtOAc:Petroleum ether); M.P. 91–93 °C; IR

(film, ν<sub>max</sub>/cm<sup>-1</sup>) 3302, 2937, 1703, 1627, 1464, 1265, 1152, 1025, 849, 696, 530; <sup>1</sup>H NMR (300 MHz, CDCl<sub>3</sub>) δ 7.44 (d, *J* = 8.0 Hz, 1H), 7.35 (d, *J* = 7.2 Hz, 1H), 7.17 (t, *J* = 7.2 Hz, 1H), 6.53 (s, 1H), 4.42 (t, *J* = 8.0 Hz, 2H), 3.42 (t, *J* = 8.0 Hz, 2H), 2.45 (s, 3H); <sup>13</sup>C NMR (101 MHz, CDCl<sub>3</sub>) δ 161.2, 146.9, 142.3, 131.0, 125.2, 123.2, 122.0, 121.2, 118.1, 46.7, 27.4, 18.0; HRMS (ESI<sup>+</sup>) *m/z*: [M + H]<sup>+</sup> calcd for C<sub>12</sub>H<sub>12</sub>NO<sup>+</sup> 186.0913; found 186.0922

### 9-Methoxy-7-methyl-2,3-dihydro-1H,5H-pyrido[3,2,1-ij]quinolin-5-one (**10r**)

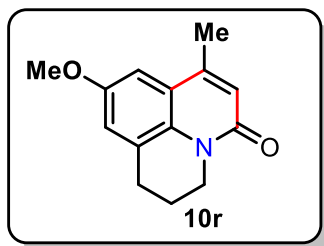

Prepared using general Procedure **C** using **7r** (0.150 g, 0.637 mmol), methacrylic acid (0.169 g, 1.91 mmol), AgNO<sub>3</sub> (0.54 g, 0.319 mmol) and K<sub>2</sub>S<sub>2</sub>O<sub>8</sub> (0.516 g, 1.91 mmol). Chromatography on silica gel with EtOAc/Petroleum ether (10–20%) afforded **10r** as a white solid (0.102 g, 70% yield).

Prepared using general Procedure **D** using **7r** (0.100 g, 0.425 mmol), methacrylic acid (0.106 g, 1.26 mmol), AgNO<sub>3</sub> (0.036 g, 0.213 mmol), 4-CzIPN (0.007 g, 0.009 mmol) and K<sub>2</sub>S<sub>2</sub>O<sub>8</sub> (0.345 g, 0.213 mmol). Chromatography on silica gel with EtOAc/Petroleum ether (10–20%) afforded **10r** as colourless solid (0.084 g, 82% yield).

**R<sub>f</sub>** = 0.15 (2:3 EtOAc:Petroleum ether); **M.P.** 113–115 °C **IR** (film,  $\nu_{\text{max}}/\text{cm}^{-1}$ ) 3539, 2923, 2854, 1734, 1643, 1615, 1576, 1264, 1121, 1066, 1073, 742, 625; **<sup>1</sup>H NMR** (300 MHz, CDCl<sub>3</sub>)  $\delta$  6.93 (s, 2H), 6.57 (s, 1H), 4.15 (t,  $J = 6.2$  Hz, 2H), 3.84 (s, 3H), 2.94 (t,  $J = 6.2$  Hz, 2H), 2.41 (s, 3H), 2.06 (p,  $J = 6.2$  Hz, 2H); **<sup>13</sup>C NMR** (101 MHz, CDCl<sub>3</sub>)  $\delta$  161.3, 154.1, 145.8, 131.1, 126.8, 122.2, 121.4, 118.0, 105.6, 55.7, 42.1, 28.3, 20.9, 19.3; **HRMS** (ESI<sup>+</sup>)  $m/z$ : [M + H] calcd for C<sub>14</sub>H<sub>16</sub>NO<sub>2</sub><sup>+</sup> 230.1176; found 230.1181.

### 1,3-Dimethylquinolin-2(1H)-one (**10s**)<sup>5</sup>

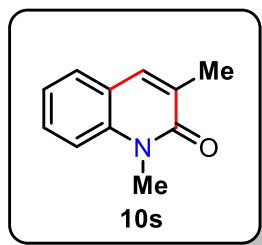

Prepared using general Procedure **C** using oxamic acid **7a** (0.145 g, 0.809 mmol), crotonic acid (0.209 g, 2.43 mmol), AgNO<sub>3</sub> (0.069 g, 0.405 mmol) and K<sub>2</sub>S<sub>2</sub>O<sub>8</sub> (0.657 g, 2.43 mmol). Chromatography on silica gel with EtOAc/Petroleum ether (10–25%) afforded **10s** as a colourless solid (0.031 g, 22% yield).

Prepared using general Procedure **D** using **7s** (0.100 g, 0.558 mmol), crotonic acid (0.123 g, 1.67 mmol), AgNO<sub>3</sub> (0.041 g, 0.279 mmol), 4-CzIPN (0.007 g, 0.011 mmol) and K<sub>2</sub>S<sub>2</sub>O<sub>8</sub> (0.388 g, 1.67 mmol). Chromatography on silica gel with EtOAc/Petroleum ether (10–25%) afforded **10s** as colourless solid (0.050 g, 52% yield).

**R<sub>f</sub>** = 0.41 (3:7 EtOAc: Petroleum Ether); **<sup>1</sup>H NMR** (300 MHz, CDCl<sub>3</sub>)  $\delta$  7.57–7.47 (m, 3H), 7.33 (d,  $J = 8.8$  Hz, 1H), 7.21 (td,  $J = 7.4, 1.1$  Hz, 1H), 3.75 (s, 3H), 2.26 (d,  $J = 1.3$  Hz, 3H); **<sup>13</sup>C NMR** (151 MHz,

CDCl<sub>3</sub>)  $\delta$  163.1, 139.3, 135.8, 130.2, 129.4, 127.9, 122.1, 120.9, 114.0, 29.8, 17.9. All data were in accordance with those previously reported.

### 1,3,4-trimethylquinolin-2(1H)-one (10t)

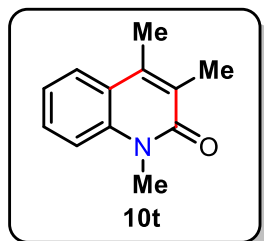

Prepared using general Procedure C using oxamic acid **7a** (0.149 g, 0.820 mmol), tiglic acid (0.246 g, 2.46 mmol), AgNO<sub>3</sub> (0.068 g, 0.410 mmol) and K<sub>2</sub>S<sub>2</sub>O<sub>8</sub> (0.665 g, 2.46 mmol). Chromatography on silica gel with EtOAc/Petroleum ether (0–7%) afforded **10t** as a yellow solid (0.080 g, 52% yield).  $R_f$  = 0.26 (2:3 EtOAc:Petroleum ether); **M.P.** 67–69 °C; **IR** (film,  $\nu_{\max}/\text{cm}^{-1}$ ), 2922, 1716, 1626, 1586, 1454, 1315, 1097, 750, 603, 446; **<sup>1</sup>H NMR** (300 MHz, CDCl<sub>3</sub>)  $\delta$  7.75 (dd,  $J$  = 8.1, 1.5 Hz, 1H), 7.51 (ddd,  $J$  = 8.1, 7.1, 1.5 Hz, 1H), 7.35 (d,  $J$  = 9.7 Hz, 1H), 7.28–7.21 (m, 1H), 3.75 (s, 3H), 2.46 (s, 3H), 2.29 (s, 3H); **<sup>13</sup>C NMR** (151 MHz, CDCl<sub>3</sub>)  $\delta$  162.6, 140.9, 138.6, 129.3, 127.4, 124.9, 121.9, 121.8, 114.2, 30.0, 15.4, 14.0; **HRMS** (ESI<sup>+</sup>)  $m/z$ : [M + H] calcd for C<sub>12</sub>H<sub>14</sub>NO<sup>+</sup> 188.1070; found 188.1070.

### 5-Methyl-1,2,3,5-tetrahydro-4H-cyclopenta[c]quinolin-4-one (10u)

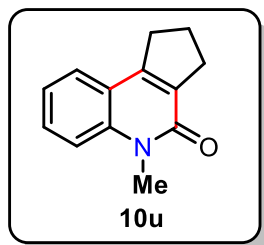

Prepared using general Procedure C using oxamic acid **7a** (0.138 g, 0.770 mmol), cyclopent-1-ene-1-carboxylic acid (0.259 g, 2.31 mmol), AgNO<sub>3</sub> (0.650 g, 0.385 mmol) and K<sub>2</sub>S<sub>2</sub>O<sub>8</sub> (0.624 g, 2.31 mmol). Chromatography on silica gel with EtOAc/Petroleum ether (10–20%) afforded **10u** as a colorless solid (0.070 g, 45% yield).  $R_f$  = 0.43 (3:7 EtOAc:Petroleum ether); **M.P.** 116–118 °C; **IR** (film,  $\nu_{\max}/\text{cm}^{-1}$ ) 2954, 1642, 1619, 1588, 1451, 1400, 1310, 1200, 1036, 758, 416; **<sup>1</sup>H NMR** (300 MHz, CDCl<sub>3</sub>)  $\delta$  7.57–7.50 (m, 2H), 7.40–7.35 (m, 1H), 7.28–7.21 (m, 1H), 3.74 (s, 3H), 3.14 (t,  $J$  = 7.5 Hz, 2H), 2.99 (t,  $J$  = 7.5 Hz, 2H), 2.19 (p,  $J$  = 7.5 Hz, 2H); **<sup>13</sup>C NMR** (151 MHz, CDCl<sub>3</sub>)  $\delta$  161.2, 150.2, 140.1, 133.4, 129.6, 125.5, 122.0, 119.8, 114.6, 32.3, 31.5, 29.4, 22.8; **HRMS** (ESI<sup>+</sup>)  $m/z$ : [M + H] calcd for C<sub>13</sub>H<sub>14</sub>NO<sup>+</sup> 200.1070; found 200.1080.

### 5-Methyl-7,8,9,10-tetrahydrophenanthridin-6(5H)-one (10v)

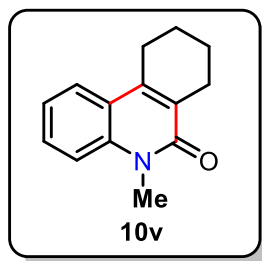

Prepared using general Procedure **C** using oxamic acid **7a** (0.145 g, 0.809 mmol), cyclohex-1-ene-1-carboxylic acid (0.306 g, 2.43 mmol), AgNO<sub>3</sub> (0.067 g, 0.404 mmol) and K<sub>2</sub>S<sub>2</sub>O<sub>8</sub> (0.657 g, 2.43 mmol). Chromatography on silica gel with EtOAc/Petroleum ether (5–10%) afforded **10v** as colorless solid (0.101 g, 59% yield).

Prepared using general Procedure **D** using oxamic acid **7a** (0.101 g, 0.56 mmol), cyclohex-1-ene-1-carboxylic acid (0.213 g, 1.69 mmol), AgNO<sub>3</sub> (0.048 g, 0.282 mmol), 4-CzIPN (0.009 g, 0.011 mmol) and K<sub>2</sub>S<sub>2</sub>O<sub>8</sub> (0.457 g, 1.69 mmol). Chromatography on silica gel with EtOAc/Petroleum ether (5–10%) afforded **10v** as colorless solid (0.069 g, 57% yield); **M.P.** 90–91 °C; **R<sub>f</sub>** = 0.53 (3:7 EtOAc:Petroleum ether); **IR** (film,  $\nu_{\text{max}}/\text{cm}^{-1}$ ) 2931, 1634, 1589, 1456, 1311, 1091, 956, 752, 587, 515; **<sup>1</sup>H NMR** (300 MHz, CDCl<sub>3</sub>)  $\delta$  7.88 (d,  $J$  = 6.6 Hz, 1H), 7.67 (t,  $J$  = 8.5 Hz, 1H), 7.52 (d,  $J$  = 9.7 Hz, 1H), 7.40 (t,  $J$  = 7.0 Hz, 1H), 3.91 (s, 3H), 3.03 (t,  $J$  = 6.1 Hz, 2H), 2.83 (t,  $J$  = 6.1 Hz, 2H), 2.08–1.91 (m, 4H); **<sup>13</sup>C NMR** (101 MHz, CDCl<sub>3</sub>)  $\delta$  162.3, 141.8, 138.1, 129.0, 128.6, 123.6, 121.8, 121.3, 114.1, 29.7, 29.6, 29.6, 25.5, 24.7, 22.0; **HRMS** (ESI<sup>+</sup>)  $m/z$ : [M + H] calcd for C<sub>14</sub>H<sub>16</sub>NO<sup>+</sup> 214.1226; found 214.1233

### 2,2,6,6-tetramethylpiperidin-1-yl methyl(phenyl)carbamate (12a)

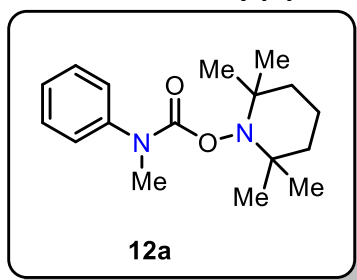

Prepared using general Procedure **D** using oxamic acid **7a** (0.100 g, 0.56 mmol), TEMPO (0.131 g, 0.837 mmol), AgNO<sub>3</sub> (0.047 g, 0.28 mmol), 4-CzIPN (0.009 g, 0.011 mmol) and K<sub>2</sub>S<sub>2</sub>O<sub>8</sub> (0.457 g, 1.67 mmol). Chromatography on silica gel with EtOAc/Petroleum ether (5–10%) afforded **12a** as yellow oil (0.103 g, 67% yield). **R<sub>f</sub>** = 0.67 (3:7 EtOAc:Petroleum ether); **IR** (film,  $\nu_{\text{max}}/\text{cm}^{-1}$ ) 2394, 1730, 1594, 1500, 1460, 1412, 1255, 1291, 957, 700, 555 **<sup>1</sup>H NMR** (300 MHz, CDCl<sub>3</sub>)  $\delta$  7.37 (t,  $J$  = 7.7 Hz, 2H), 7.24 (s, 3H), 3.31 (s, 3H), 1.69–1.29 (m, 6H), 1.11 (s, 6H), 0.84 (s, 6H); **<sup>13</sup>C NMR** (151 MHz, CDCl<sub>3</sub>)  $\delta$  156.7, 143.5, 129.0, 126.6, 126.5, 60.2, 39.0, 31.8, 20.7, 17.0; **HRMS** (ESI<sup>+</sup>)  $m/z$ : [M + H] calcd for C<sub>17</sub>H<sub>27</sub>N<sub>2</sub>O<sub>2</sub><sup>+</sup> 291.2076; found 291.2075.



### Methyl 1,4-dimethyl-2-oxo-1,2,3,4-tetrahydroquinoline-4-carboxylate (**13**)<sup>9</sup>

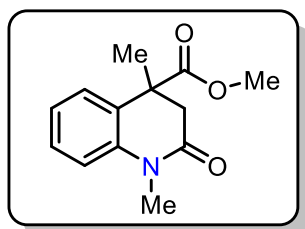

Prepared using general Procedure **D** using oxamic acid **7a** (0.100 g, 0.56 mmol), methyl methacrylate (0.167 g, 0.178 mmol), AgNO<sub>3</sub> (0.047 g, 0.28 mmol), 4-CzIPN (0.009 g, 0.011 mmol) and K<sub>2</sub>S<sub>2</sub>O<sub>8</sub> (0.457 g, 1.67 mmol). Chromatography on silica gel with EtOAc/Petroleum ether (5–10%) afforded **13** as yellow solid (0.052 g, 40% yield). *R*<sub>f</sub> = 0.43 (3:7

EtOAc:Petroleum ether); <sup>1</sup>H NMR (300 MHz, CDCl<sub>3</sub>) δ 7.36–7.26 (m, 2H), 7.09 (td, *J* = 7.7, 1.2 Hz, 1H), 7.01 (d, *J* = 9.3 Hz, 1H), 3.68 (s, 3H), 3.36 (s, 3H), 3.14 (d, *J* = 15.9 Hz, 1H), 2.56 (d, *J* = 15.9 Hz, 1H), 1.60 (s, 3H); <sup>13</sup>C NMR (101 MHz, CDCl<sub>3</sub>) δ 174.4, 168.4, 139.8, 128.8, 126.1, 123.40, 115.3, 52.9, 44.7, 41.7, 29.6, 23.4.

### 1,4-dimethyl-2-oxo-1,2,3,4-tetrahydroquinoline-4-carboxylic acid (**9a**)

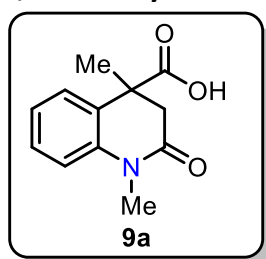

Prepared according to general procedure **B** using **13** (0.180 g, 0.772 mmol), potassium hydroxide (0.052 g, 0.93 mL) in THF (15 mL) to afford the commercially available 1,4-dimethyl-2-oxo-1,2,3,4-tetrahydroquinoline-4-carboxylic acid (**9a**) as a colorless solid (0.147 g, 87 % yield). *R*<sub>f</sub> = 0.18 (1:4 MeOH:DCM) <sup>1</sup>H NMR (300 MHz, CDCl<sub>3</sub>) δ 9.05 (s,

1H), 7.27 (dq, *J* = 16.4, 7.6 Hz, 2H), 7.06 (t, *J* = 7.5 Hz, 1H), 6.87 (d, *J* = 7.8 Hz, 1H), 3.68 (s, 3H), 3.09 (d, *J* = 16.2 Hz, 1H), 2.55 (d, *J* = 16.2 Hz, 1H), 1.63 (s, 3H); <sup>13</sup>C NMR (75 MHz, CDCl<sub>3</sub>) δ 178.6, 171.7, 136.1, 129.1, 126.6, 125.3, 124.3, 116.7, 44.8, 40.5, 23.31, 21.0.

## 16. References

- (1) Q.-F. Bai, C. Jin, J.-Y. He, G. Feng. *Org. Lett.* 2018, **20**, 2172.
- (2) A. J. Chinn, J. Hwang, B. Kim, C. A. Parish, S. W. Krska, S. J. Miller. *J. Org. Chem.* 2020, **85**, 9424.
- (3) G. Chen, C. Li, J. Peng, Z. Yuan, P. Liu, X. Liu, *Org. Biomol. Chem.* 2019, **17**, 8527.
- (4) Y. Wakita, S. Y. Noma, M. Maeda, M. Kojima, *J. Organomet. Chem.* 1985, **297**, 379.
- (5) T. Hu, L. Lückemeier, C. Daniliuc, F. Glorius, *Angew. Chemie Int. Ed.* 2021, **60**, 23193.

- (6) K. Diehl, G. Himbert, L. Henn, *Chem. Ber.* 1986, **119**, 2430.
- (7) J. F. Rodríguez, A. Zhang, J. Bajohr, A. Whyte, B. Mirabi, M. Lautens, *Angew. Chemie Int. Ed.* 2021, **60**, 18478.
- (8) Y. Moon, E. Jang, S. Choi, S. Hong, *Org. Lett.* 2017, **20**, 240.
- (9) W. F. Petersen, R. J. K. Taylor, J. R. Donald, *Org. Biomol. Chem.* 2017, **15**, 5831.

## 17. NMR SPECTRA

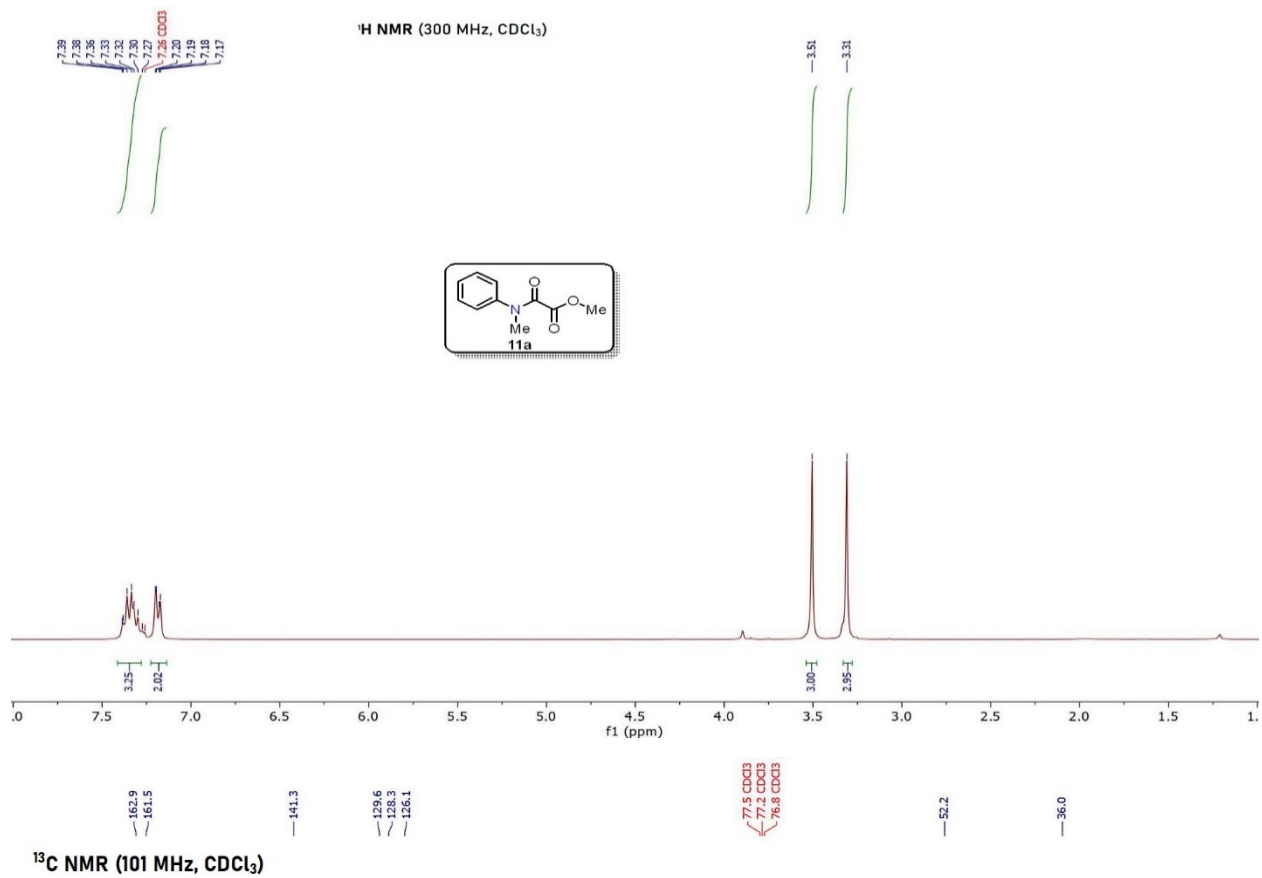

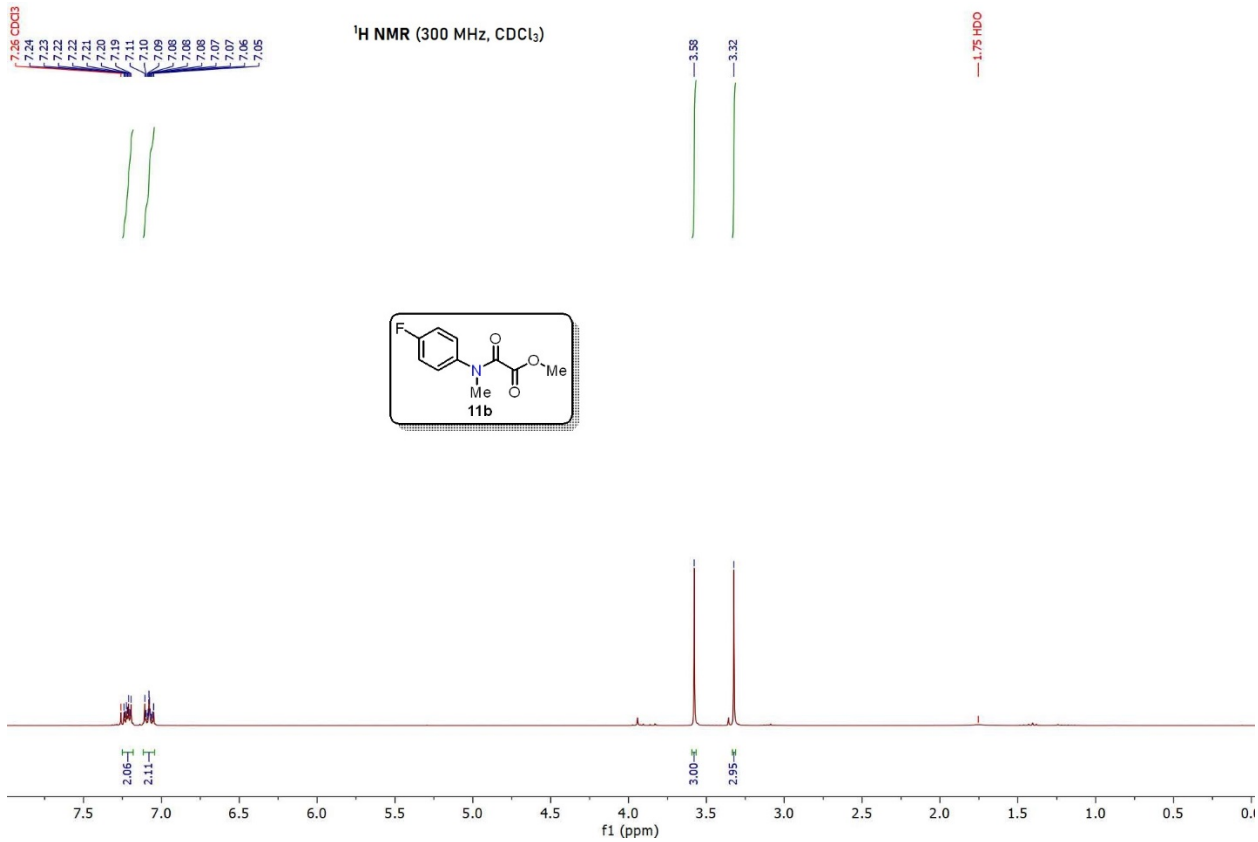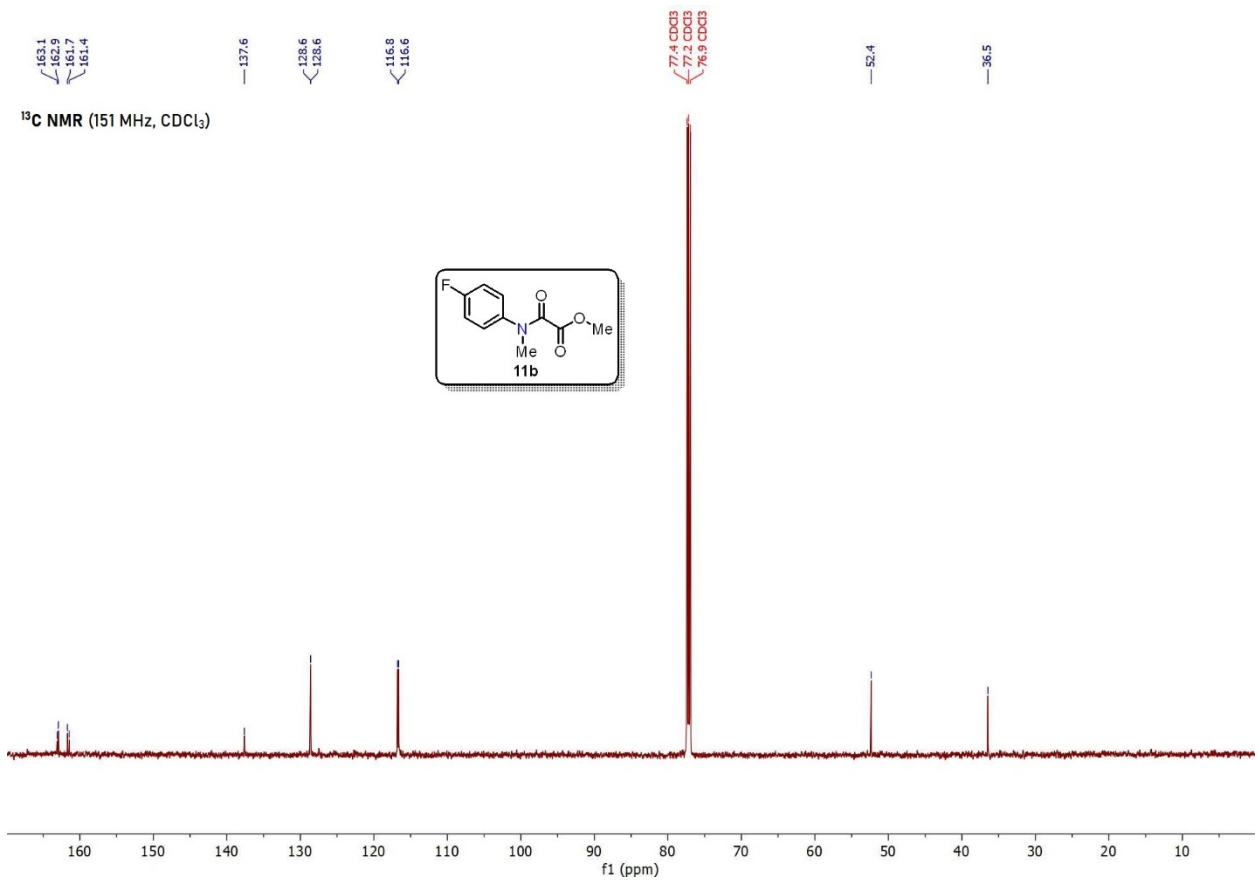

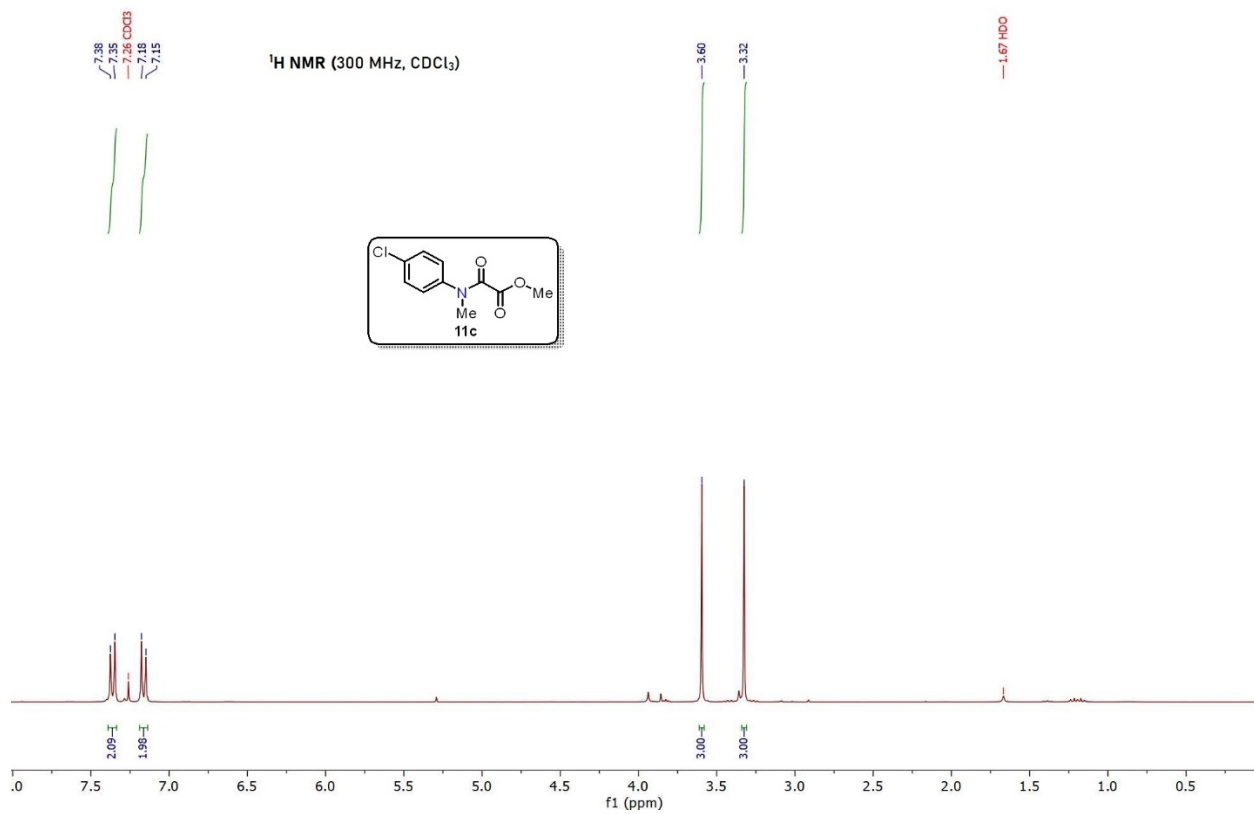

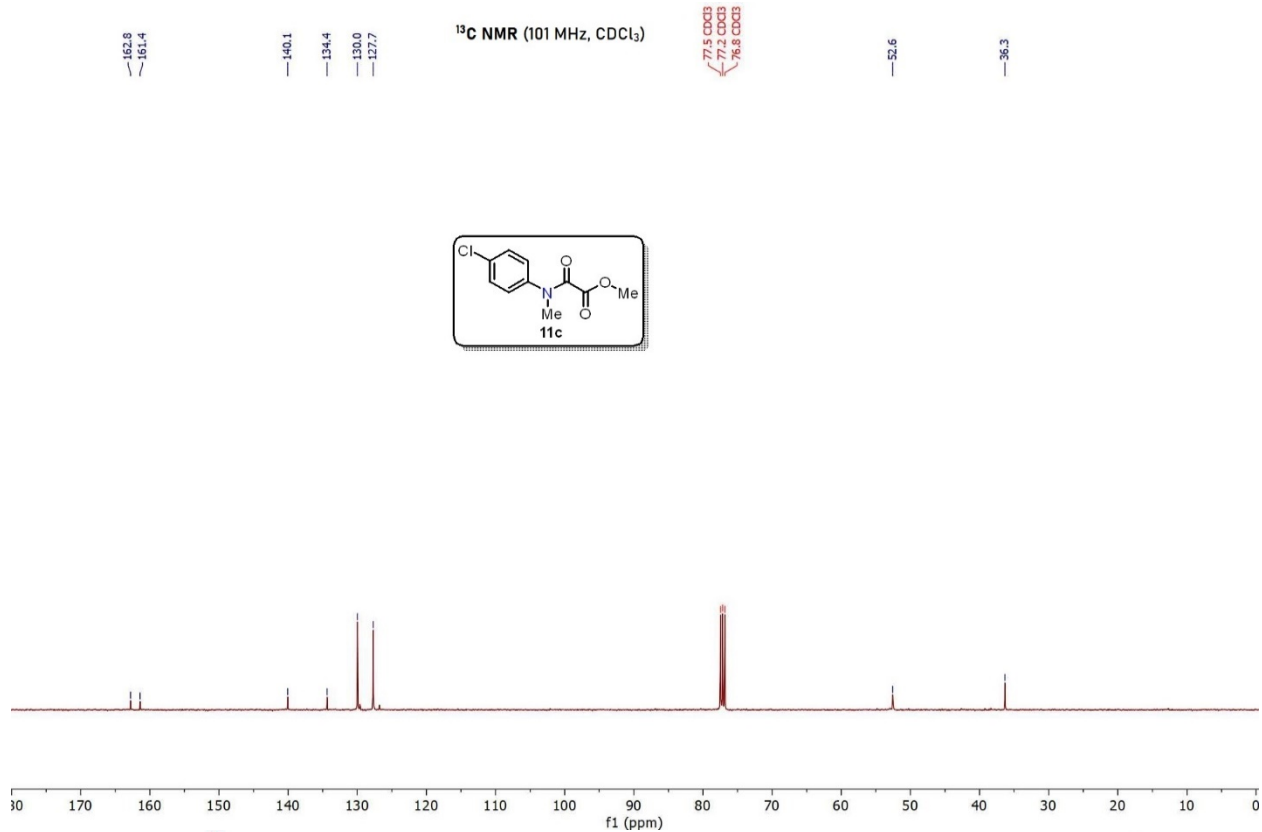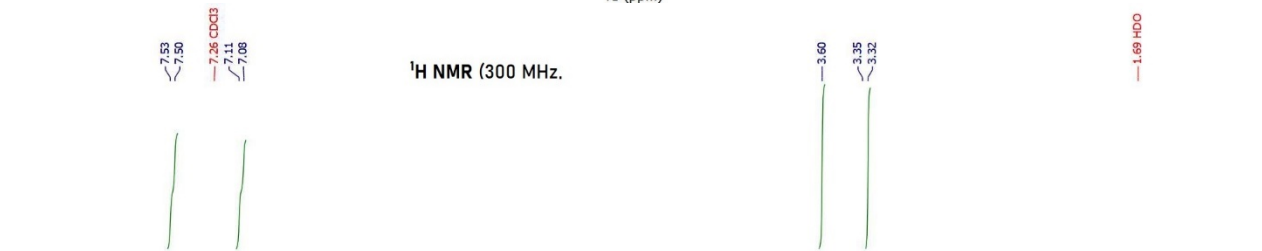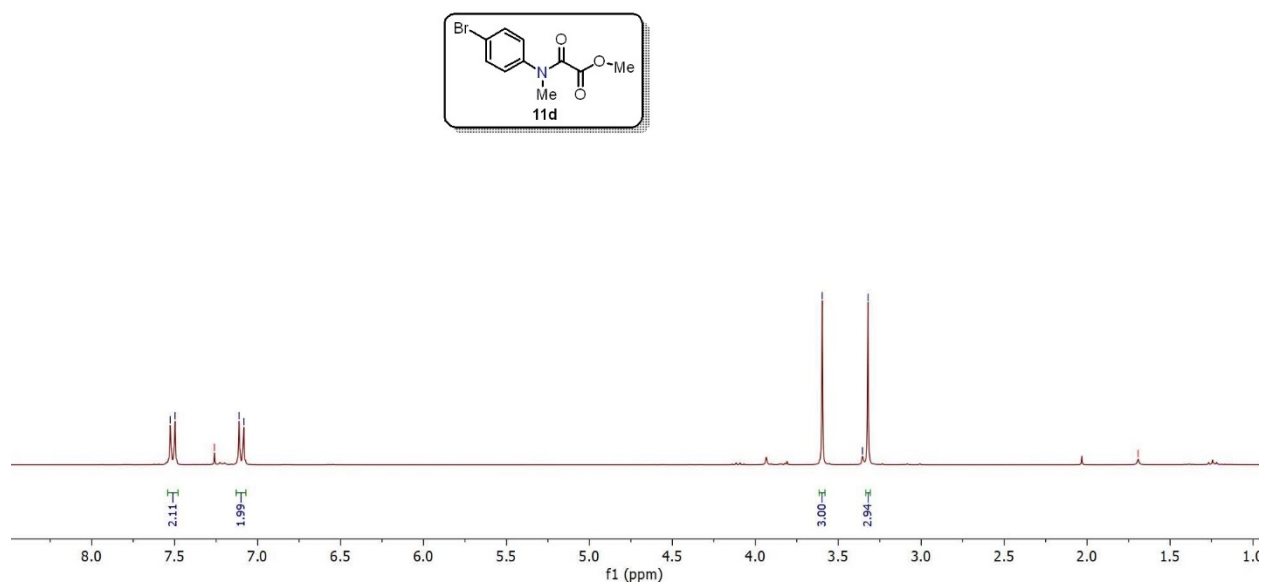

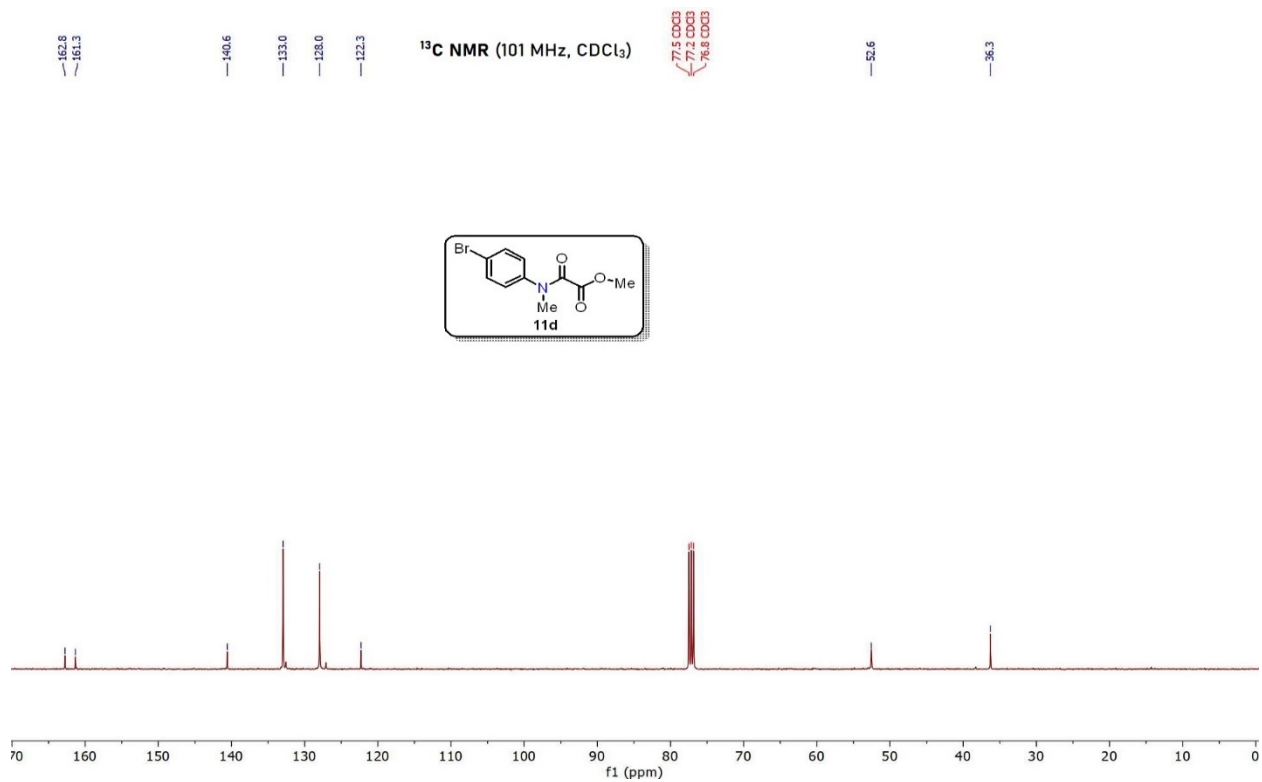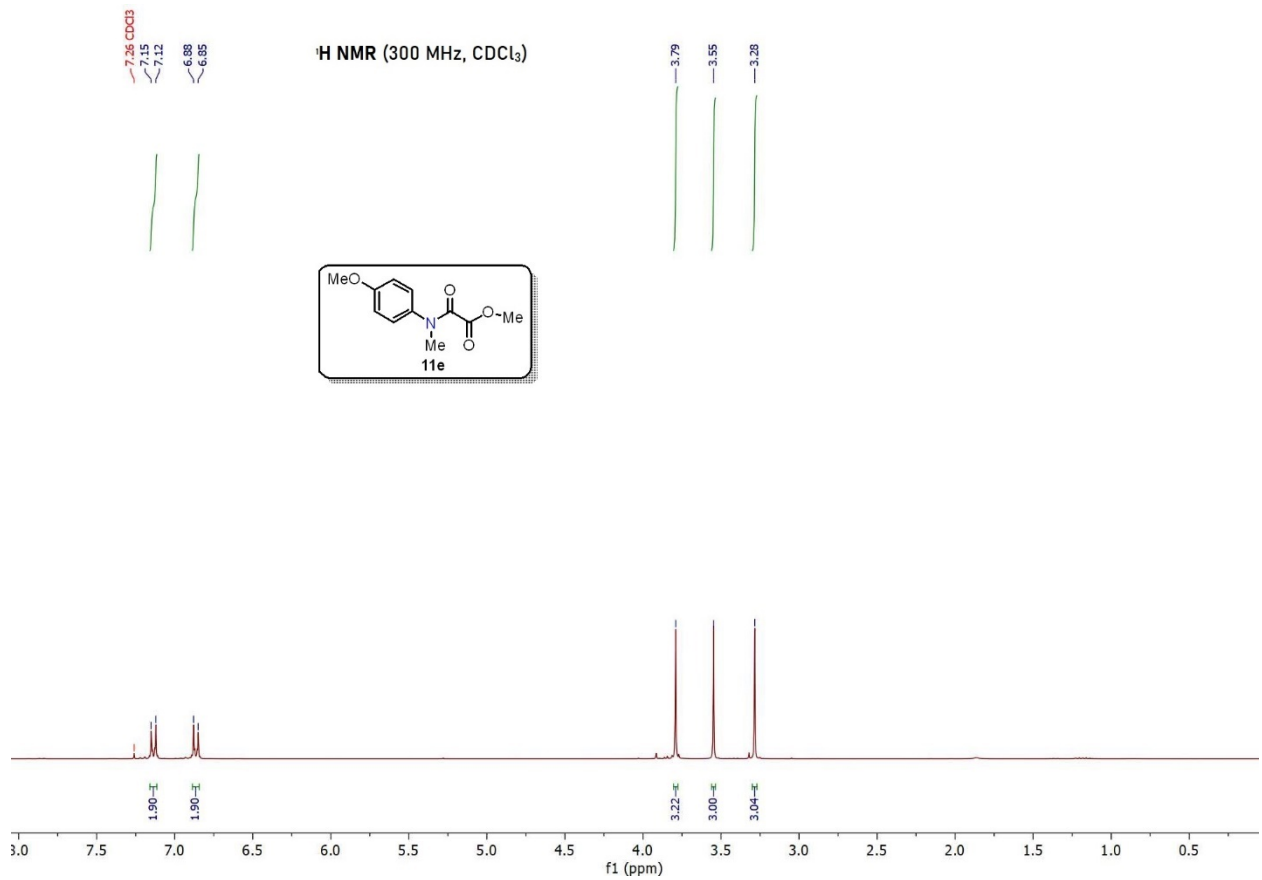

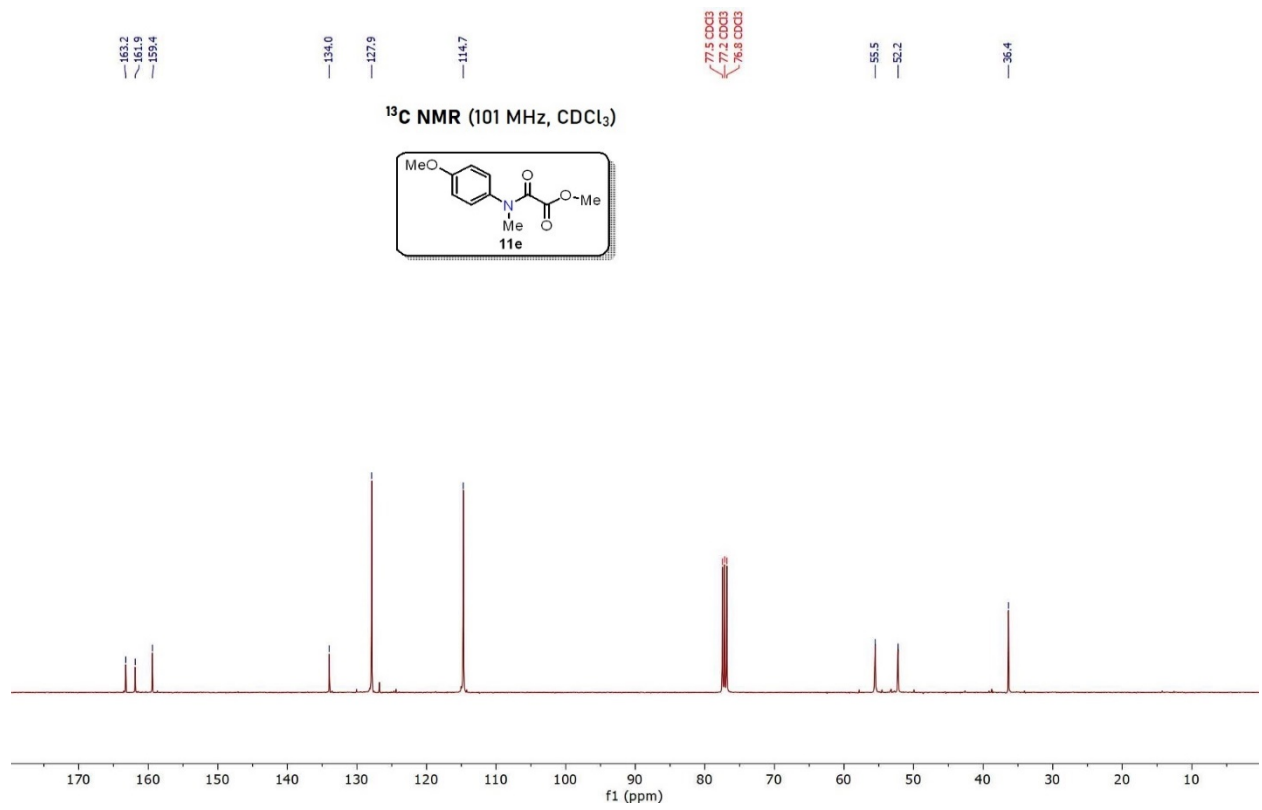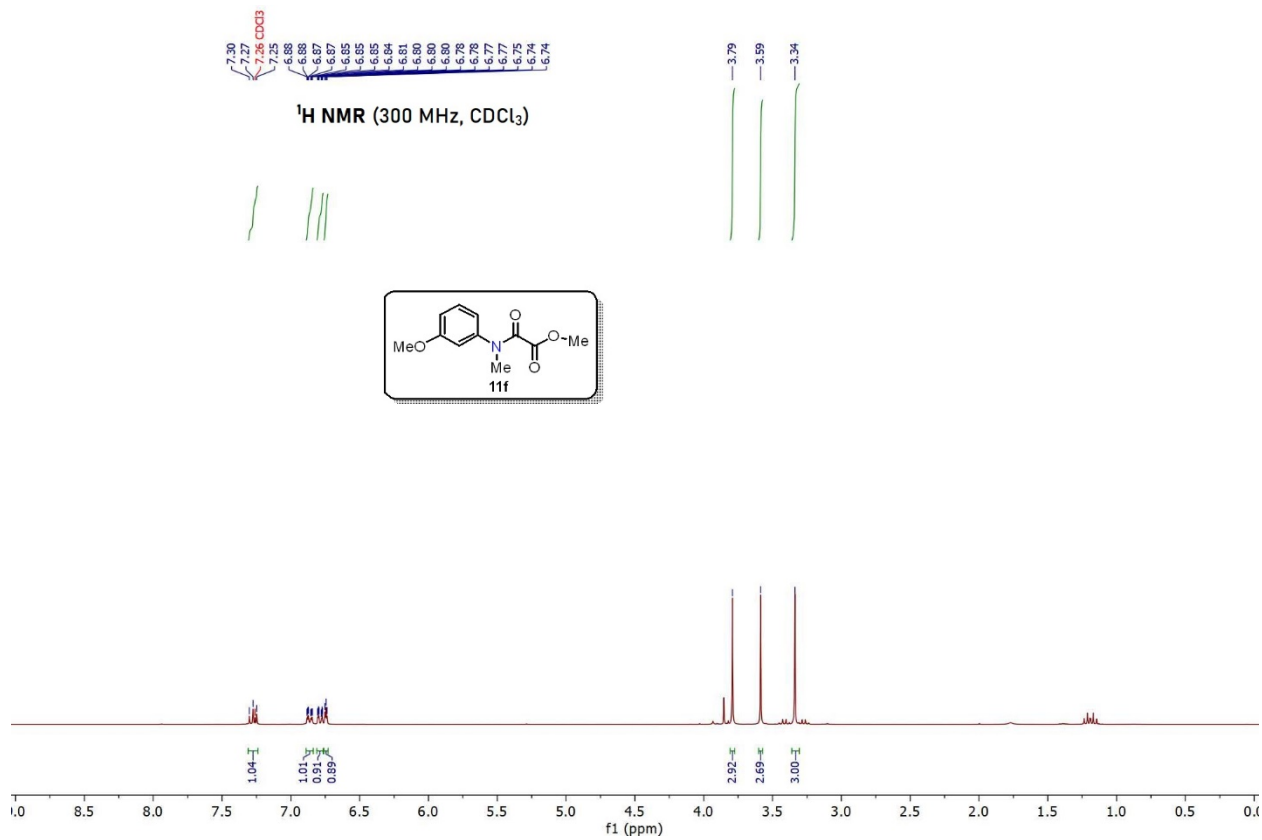



<sup>13</sup>C NMR (151 MHz, CDCl<sub>3</sub>)

- 163.1
- 161.7
- 160.5
- 142.7
- 130.4
- 118.3
- 114.1
- 111.9
- 77.4 CDCl<sub>3</sub>
- 77.2 CDCl<sub>3</sub>
- 76.9 CDCl<sub>3</sub>
- 55.6
- 52.4
- 36.2

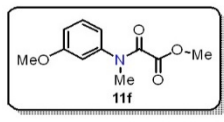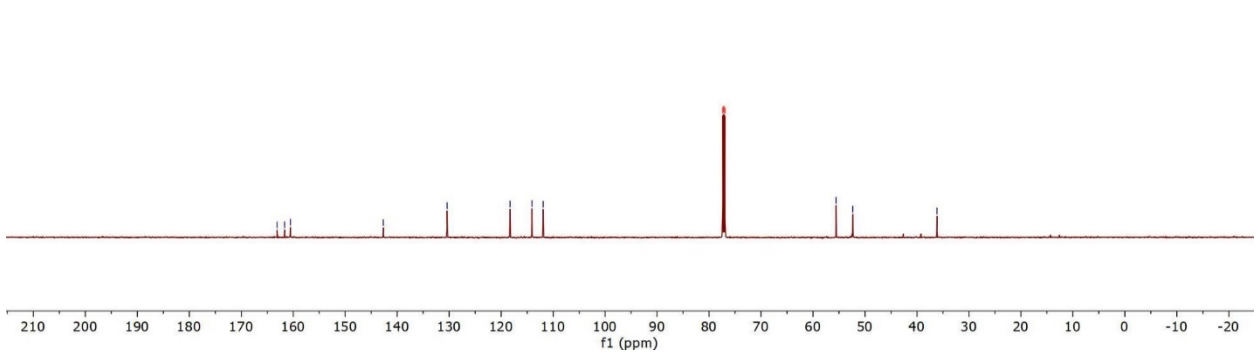

<sup>1</sup>H NMR (300 MHz, CDCl<sub>3</sub>)

- 7.68
- 7.55
- 7.30
- 7.27
- 7.26 CDCl<sub>3</sub>
- 7.25 CDCl<sub>3</sub>
- 3.59
- 3.36
- 2.59

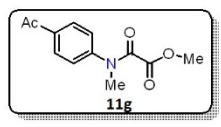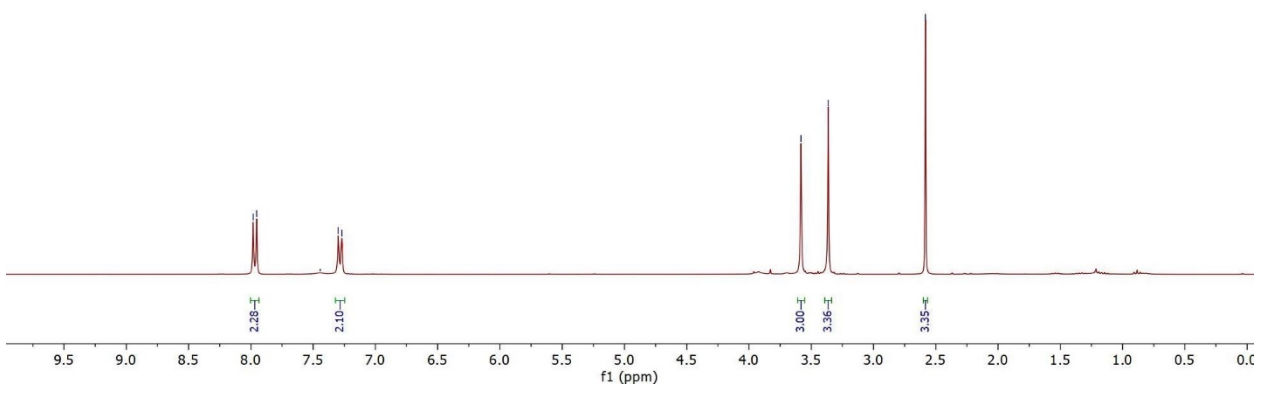

$^{13}\text{C}$  NMR (75 MHz,  $\text{CDCl}_3$ )

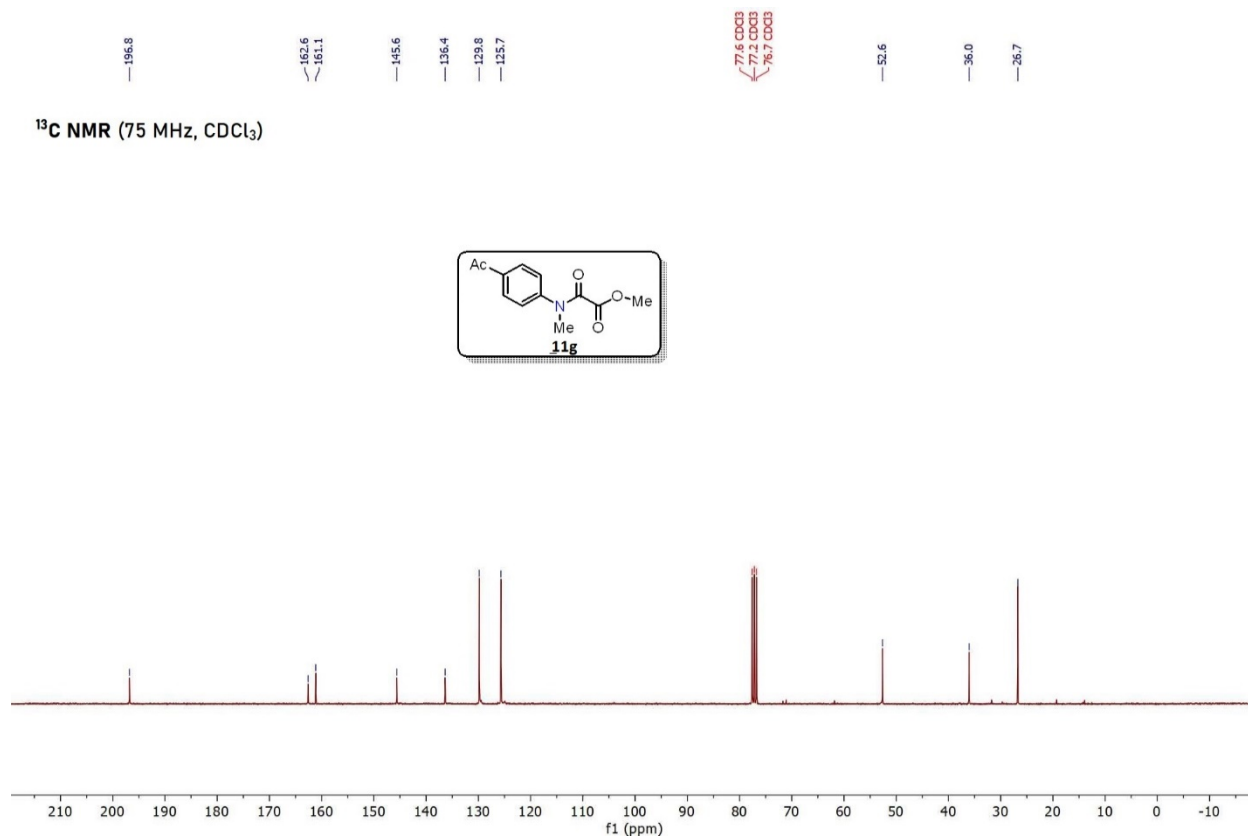

$^1\text{H}$  NMR (300 MHz,  $\text{CDCl}_3$ )

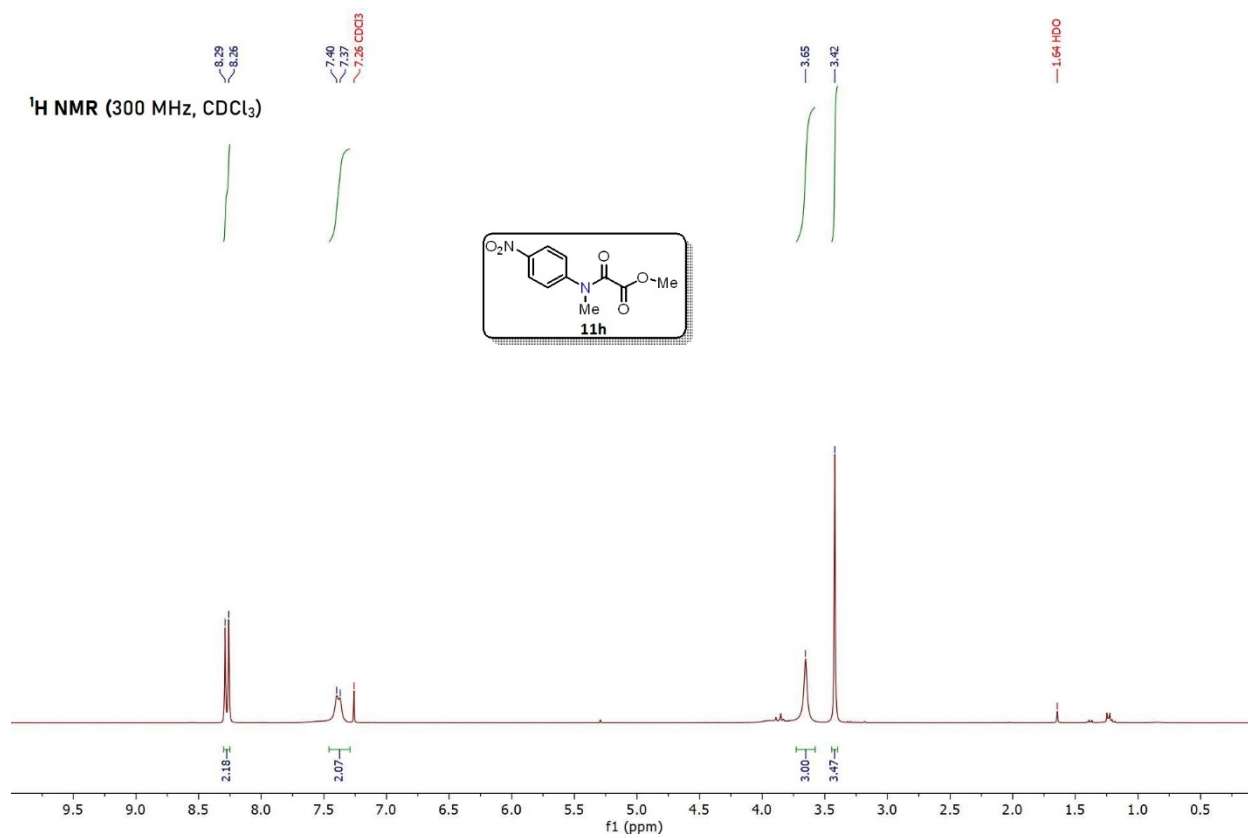

<sup>13</sup>C NMR (151 MHz, CDCl<sub>3</sub>)

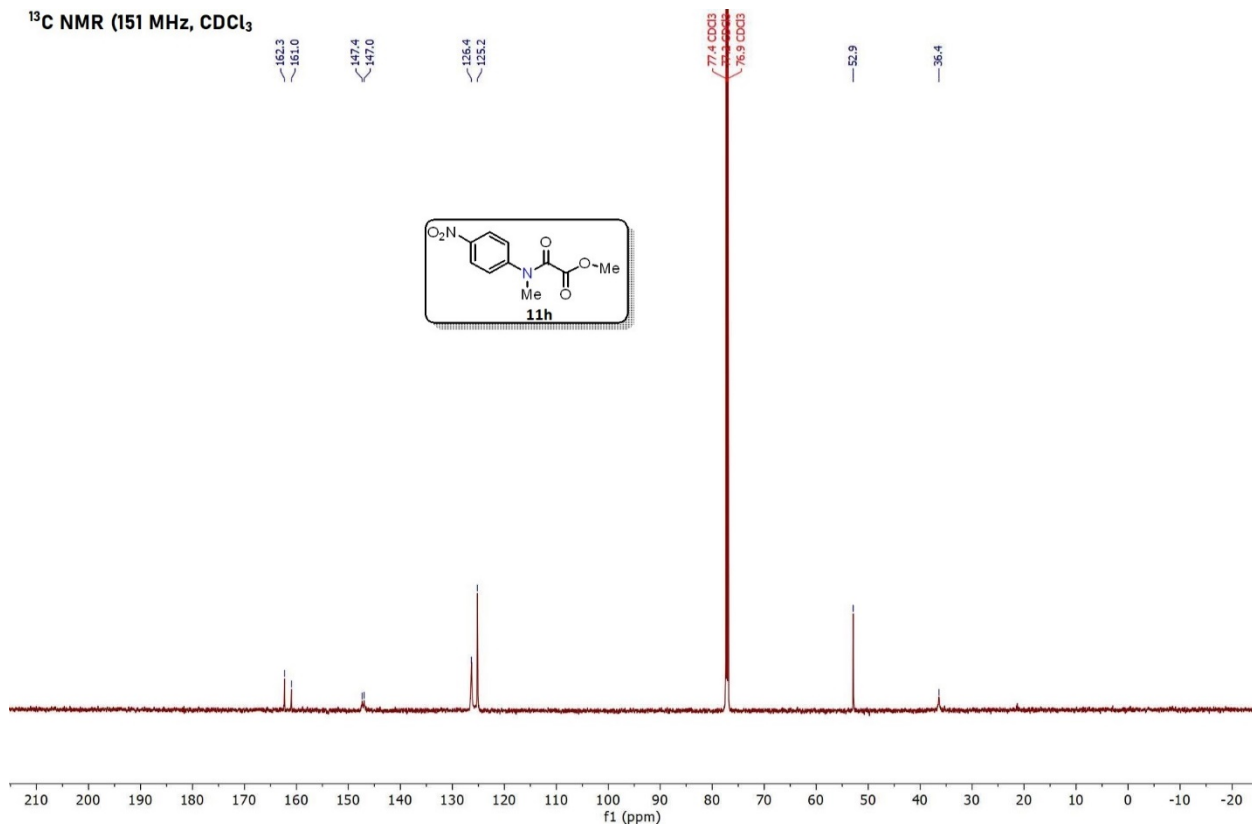

<sup>1</sup>H NMR (300 MHz, CDCl<sub>3</sub>)

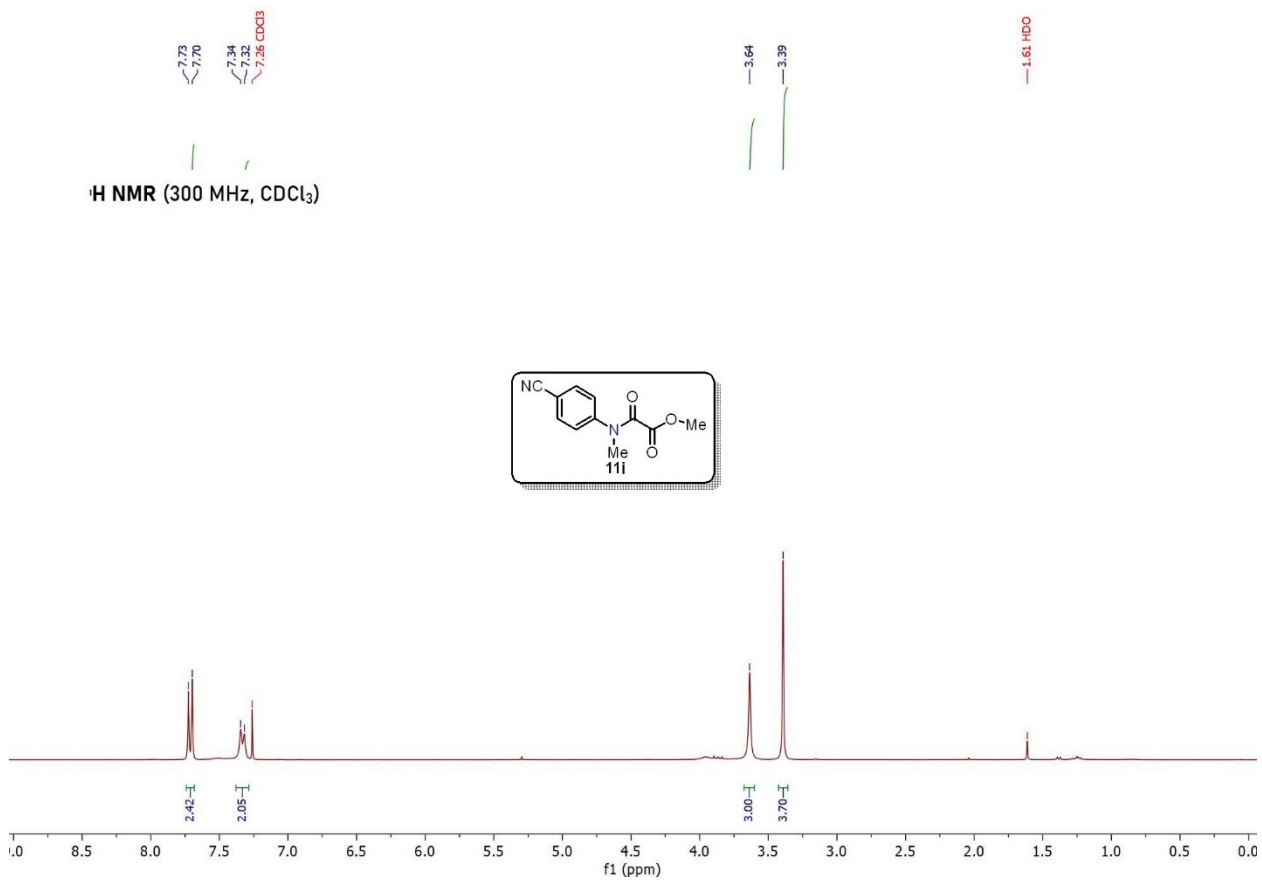

<sup>13</sup>C NMR (151 MHz, CDCl<sub>3</sub>)

162.4  
161.0  
146.8  
133.7  
126.6  
117.9  
112.3

77.4 CDCl<sub>3</sub>  
77.0 CDCl<sub>3</sub>  
76.9 CDCl<sub>3</sub>

52.8

36.2

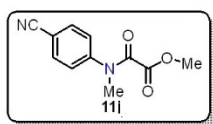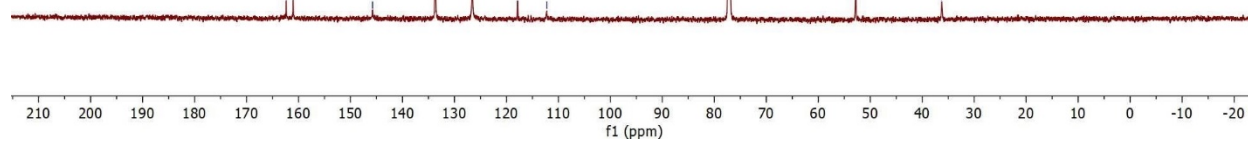

<sup>19</sup>F NMR (377 MHz, CDCl<sub>3</sub>)

-106.99

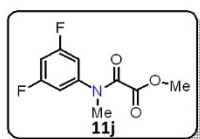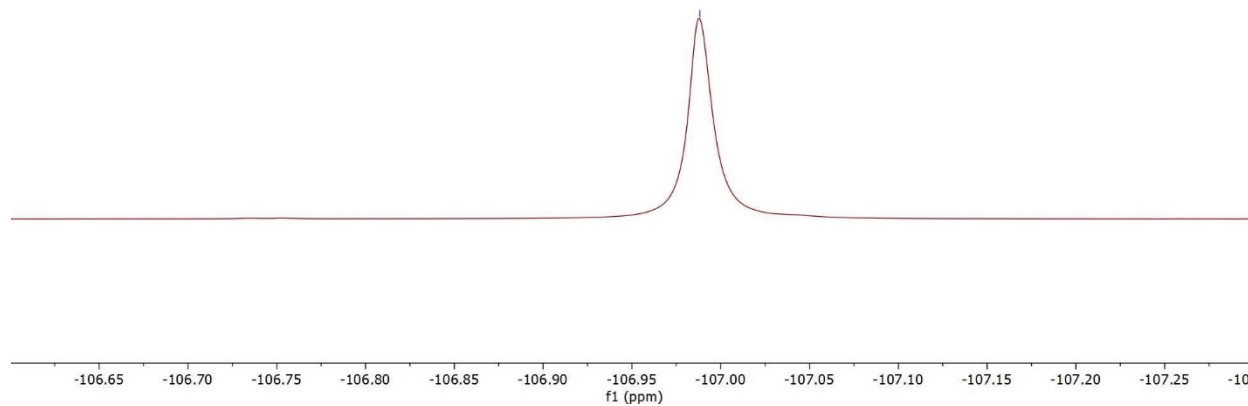

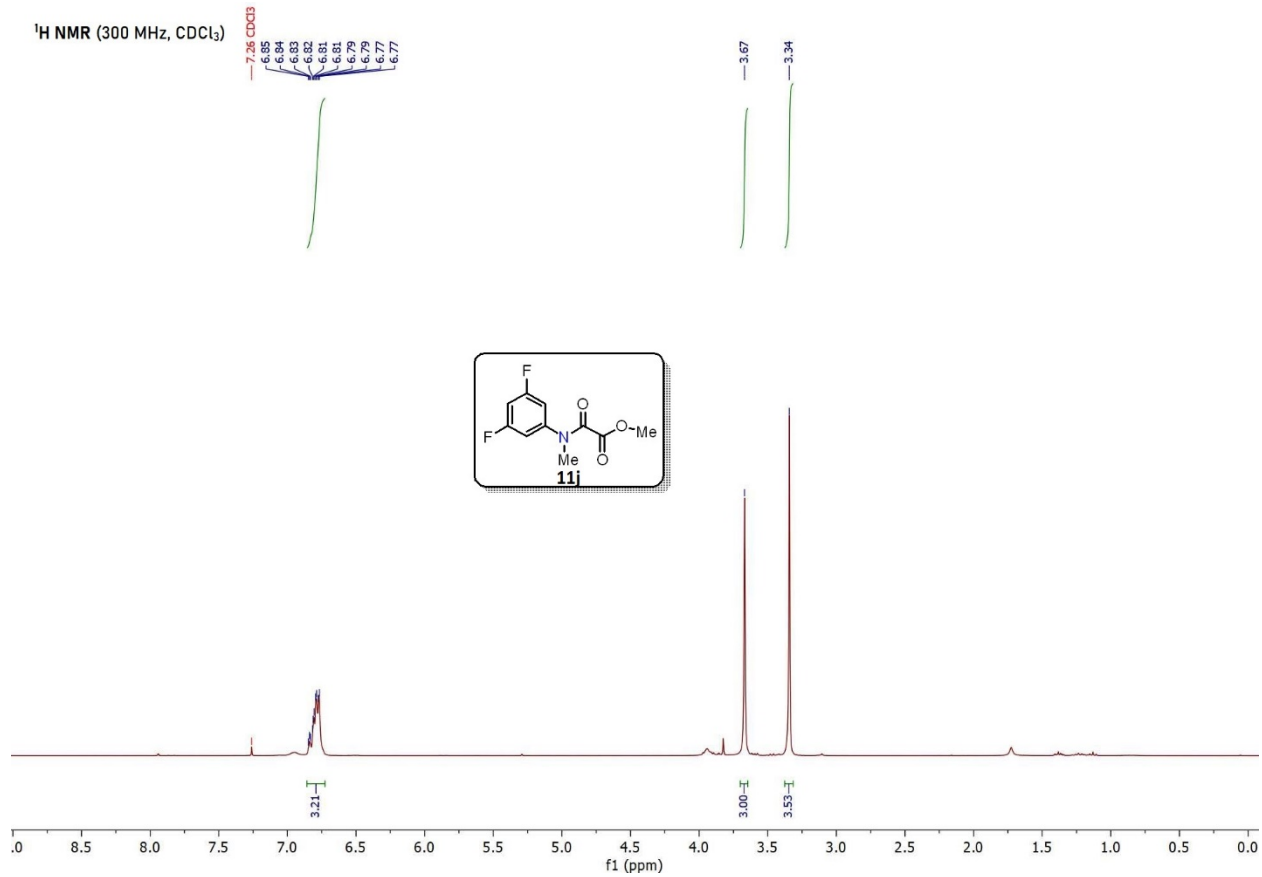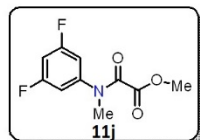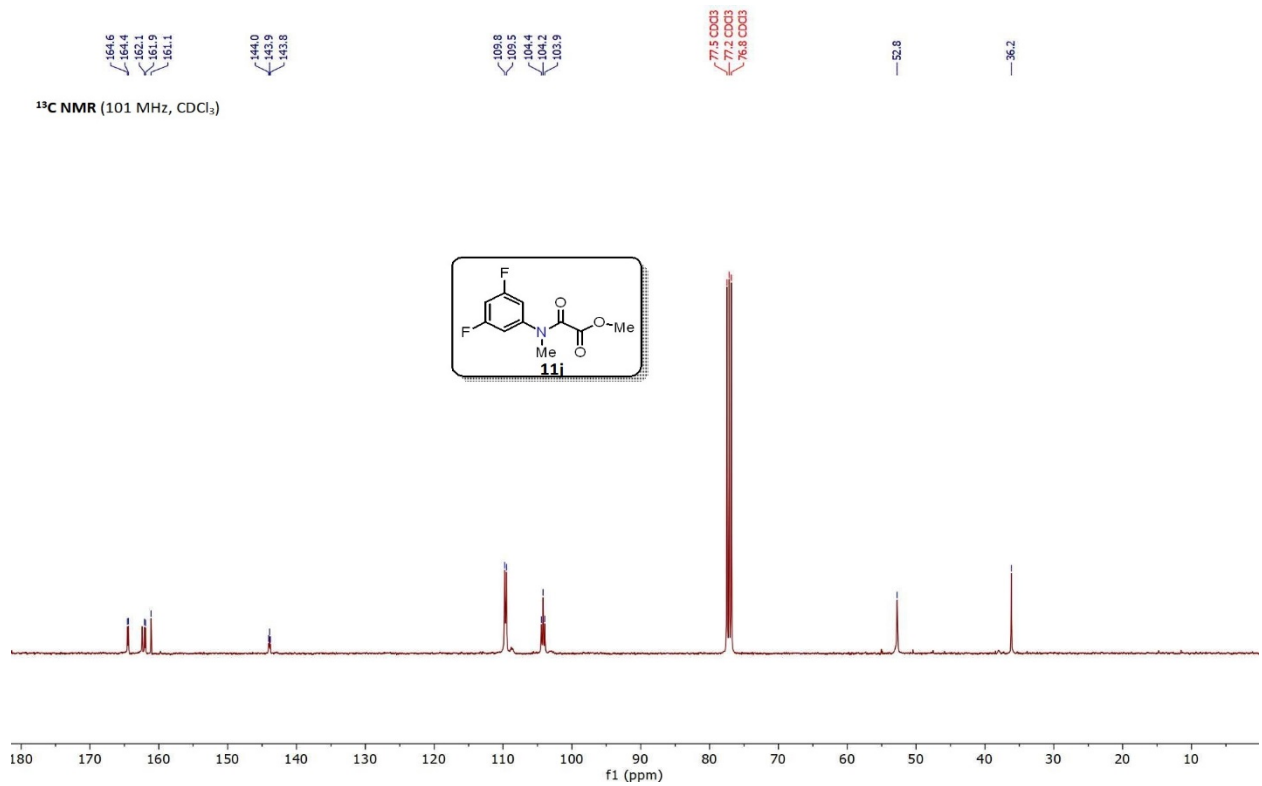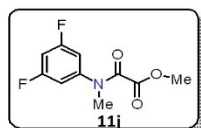

<sup>13</sup>C NMR (75 MHz, CDCl<sub>3</sub>)

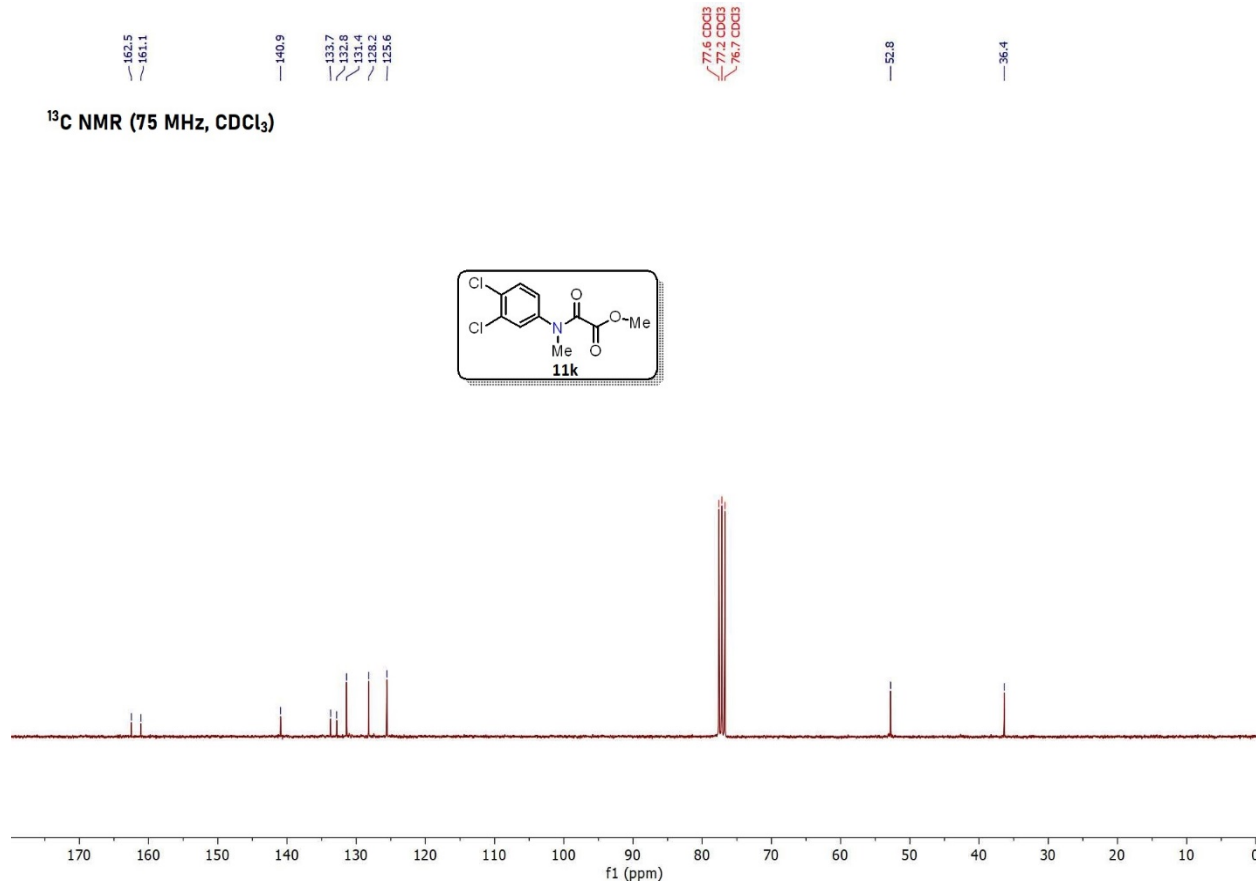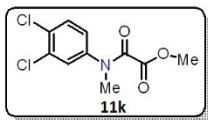

<sup>1</sup>H NMR (300 MHz, CDCl<sub>3</sub>)

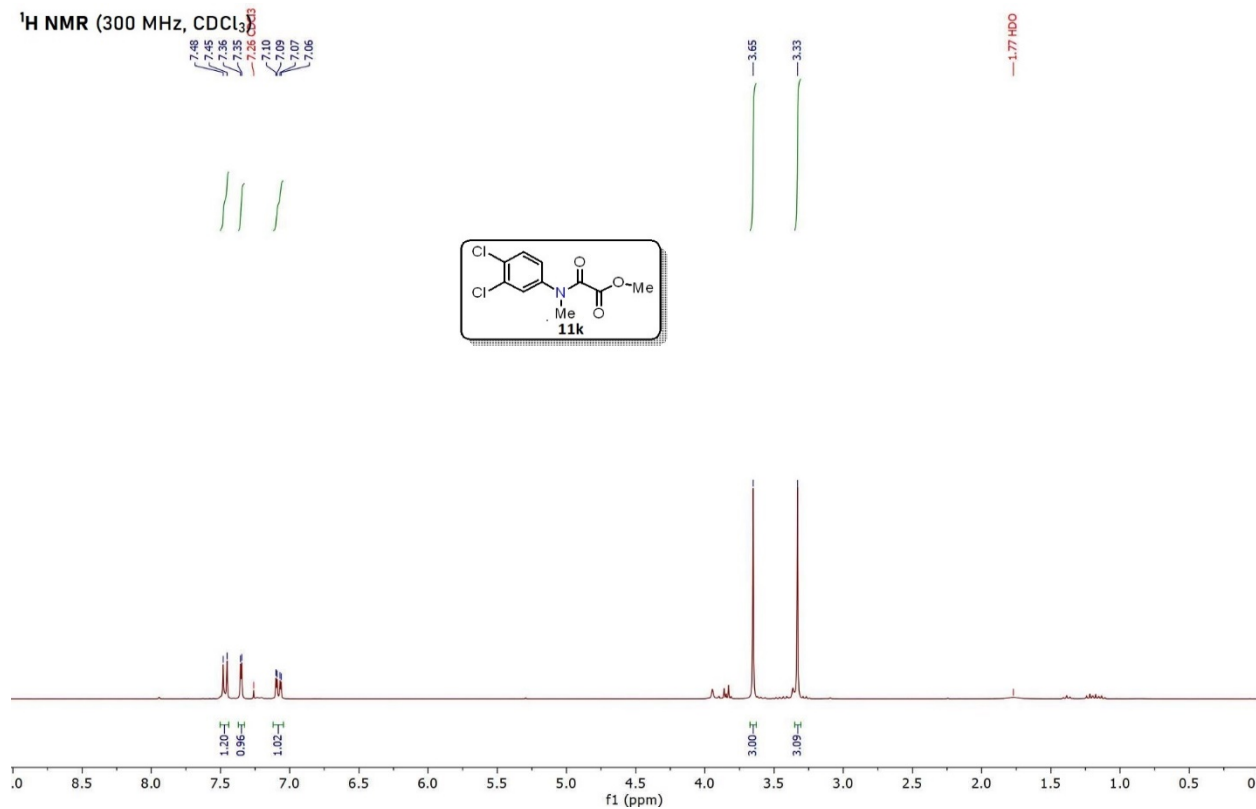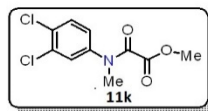

$^{19}\text{F}$  NMR (377 MHz,  $\text{CDCl}_3$ )

Tautomers

-101.42

-103.20

methyl 2-((4-bromo-3,5-difluorophenyl)amino)-2-oxoacetate

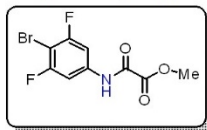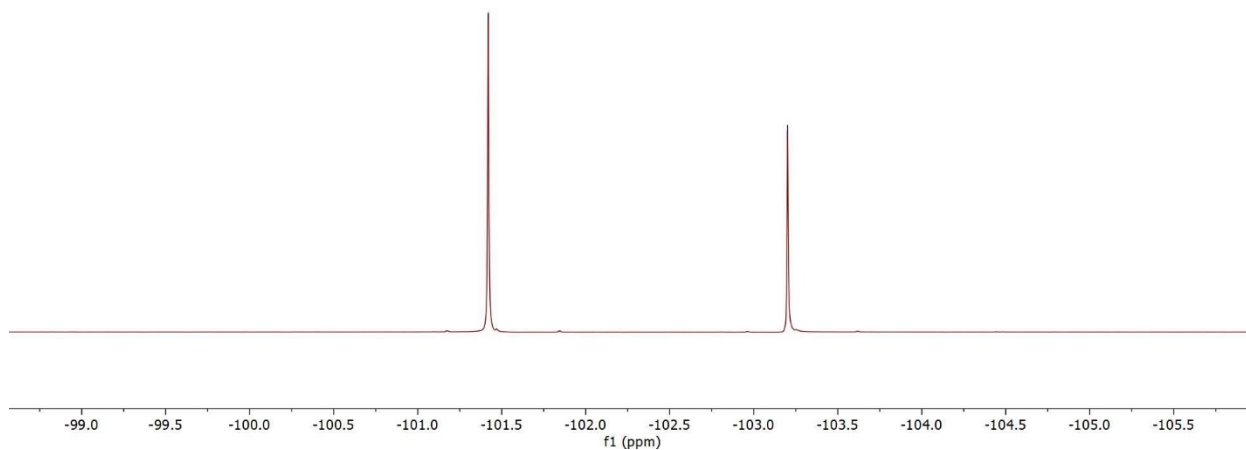

$^1\text{H}$  NMR (300 MHz,  $\text{CDCl}_3$ )

Tautomers

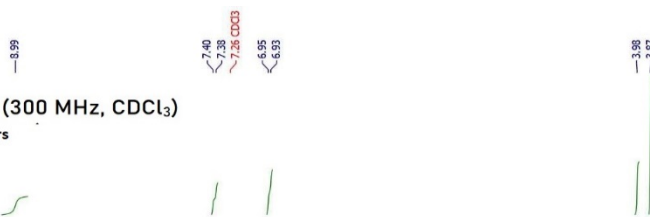

methyl 2-((4-bromo-3,5-difluorophenyl)amino)-2-oxoacetate

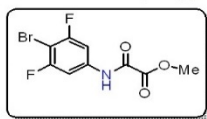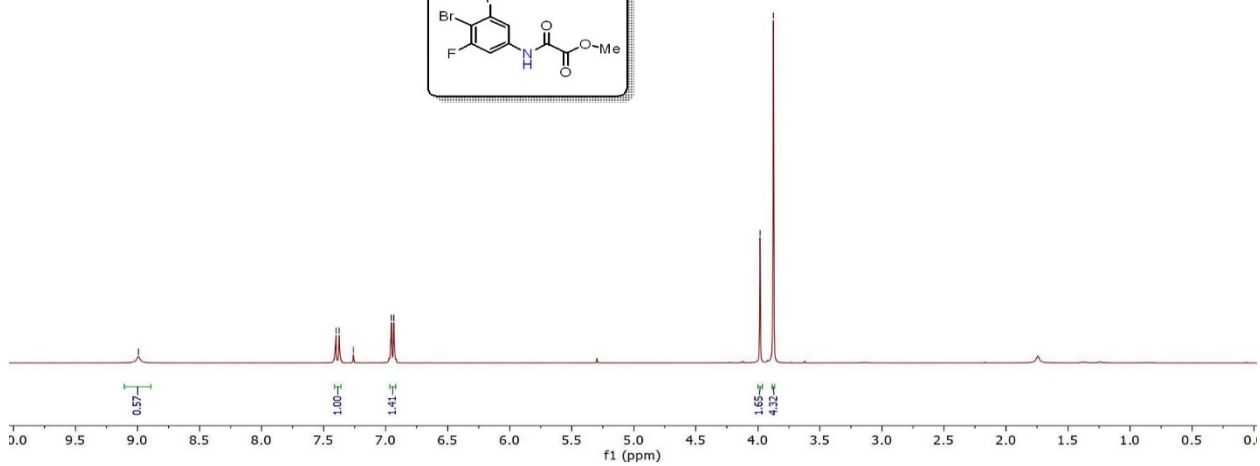

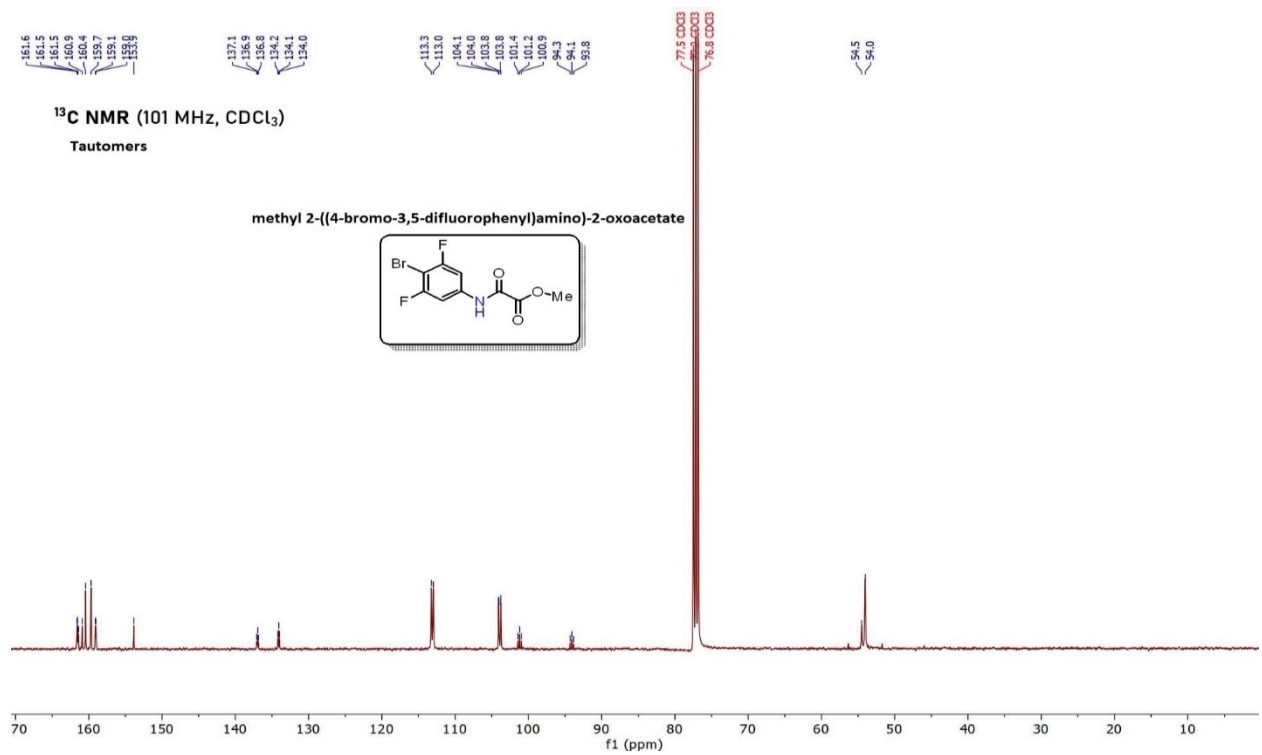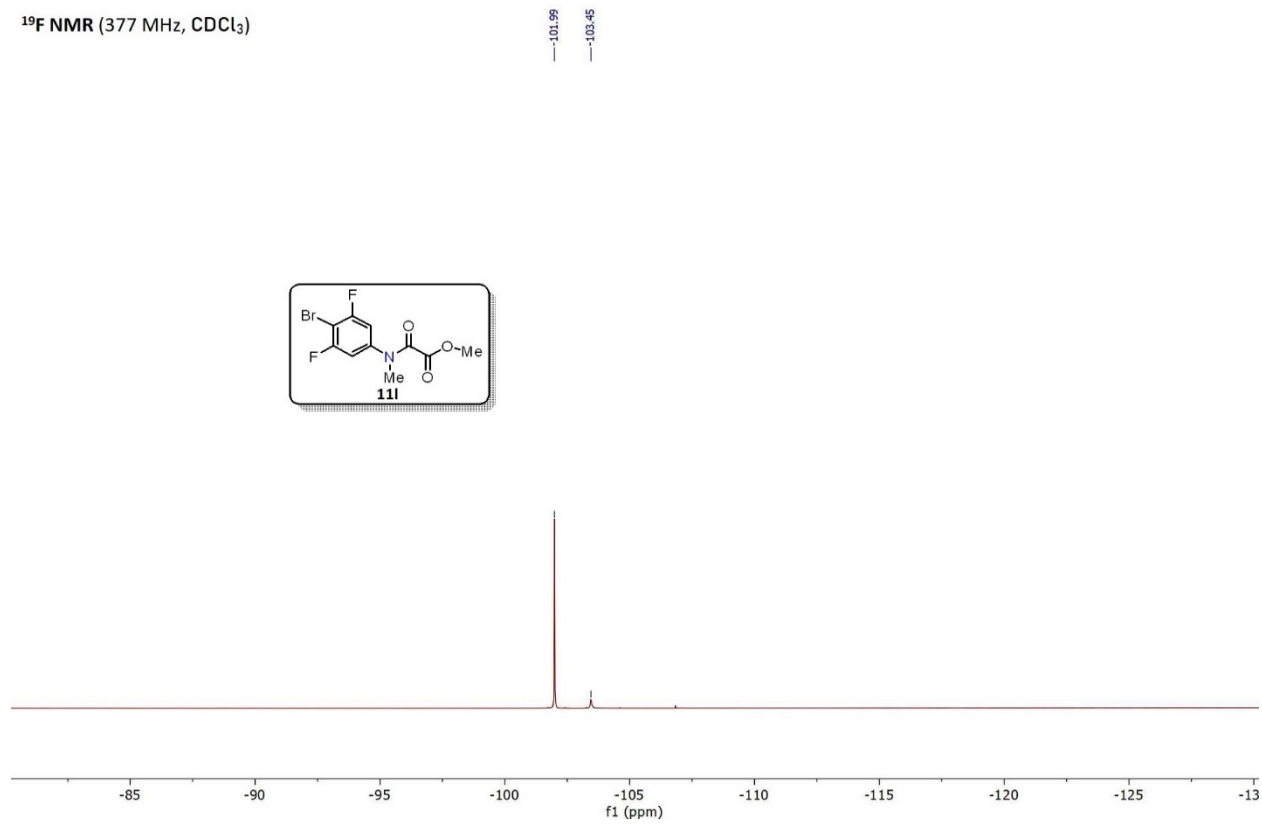



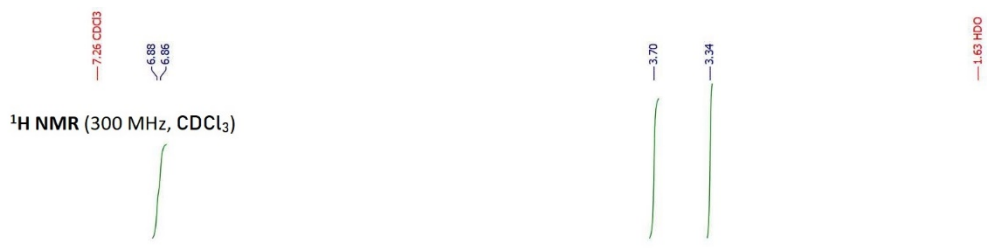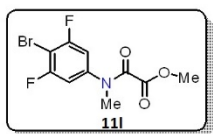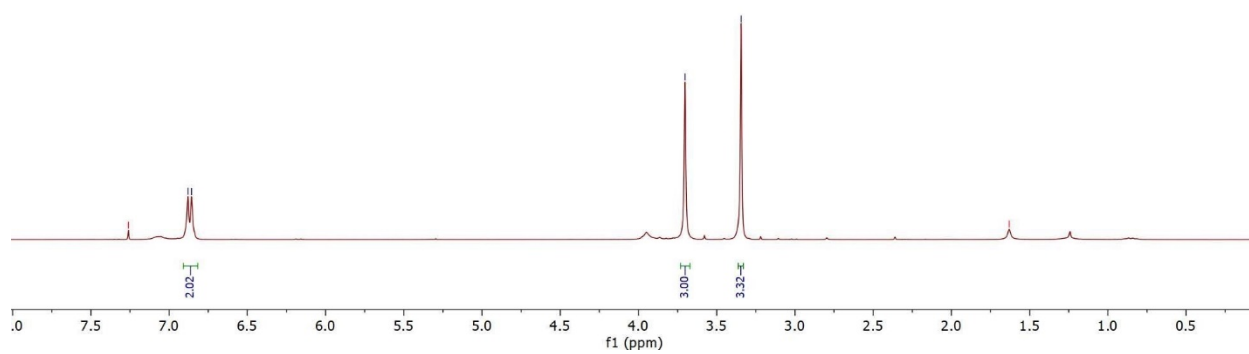

<sup>13</sup>C NMR (101 MHz, CDCl<sub>3</sub>)

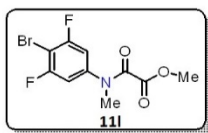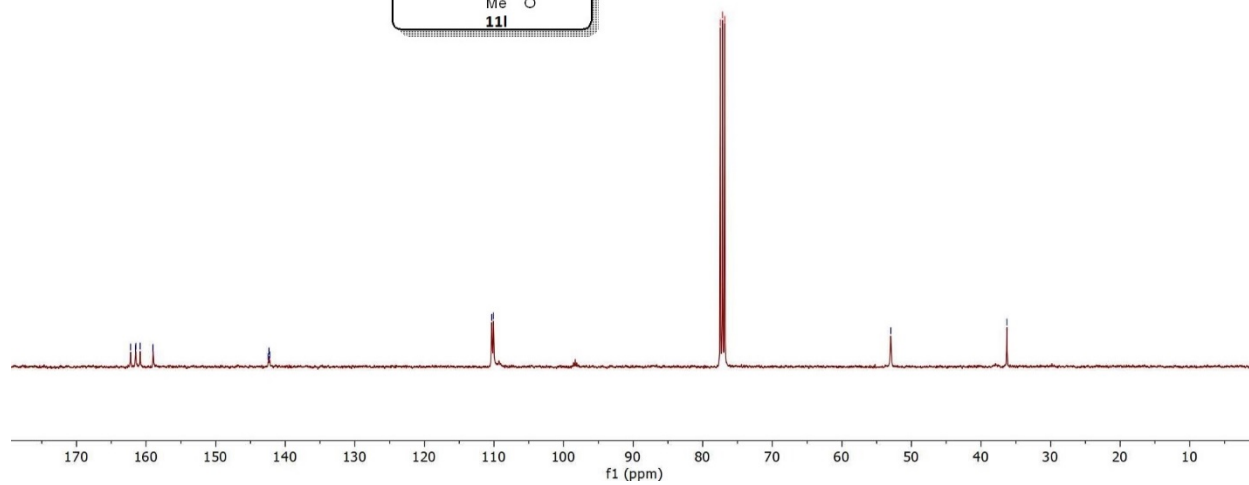

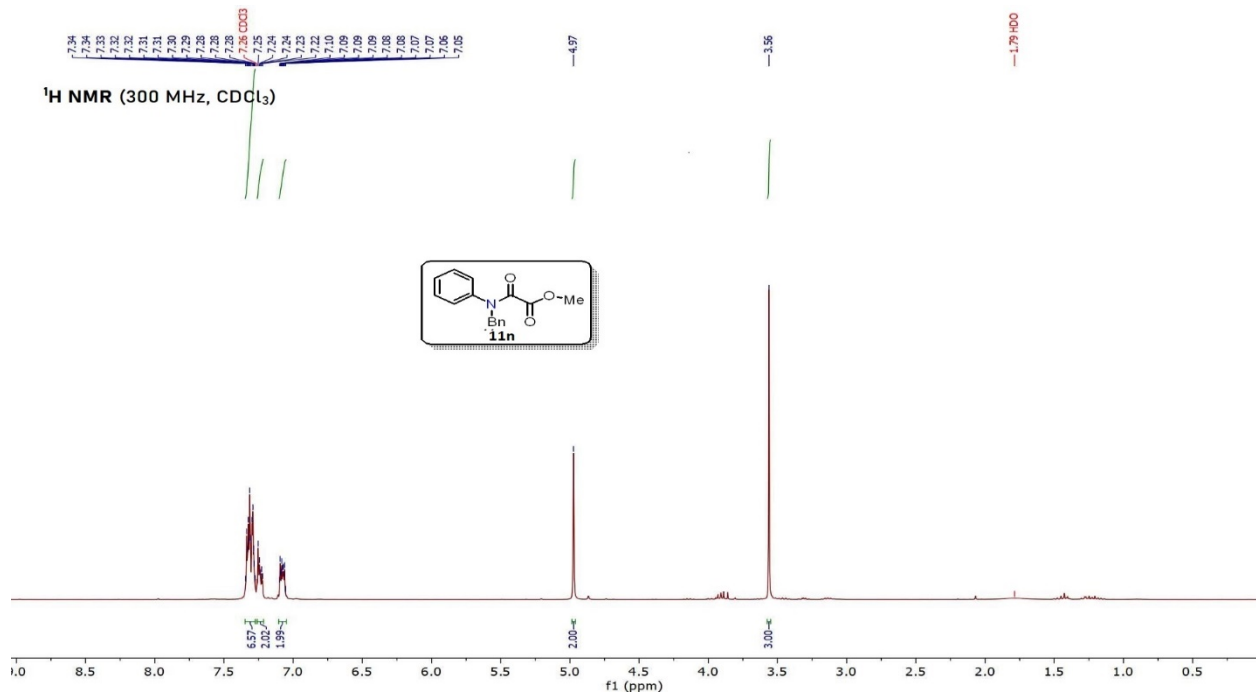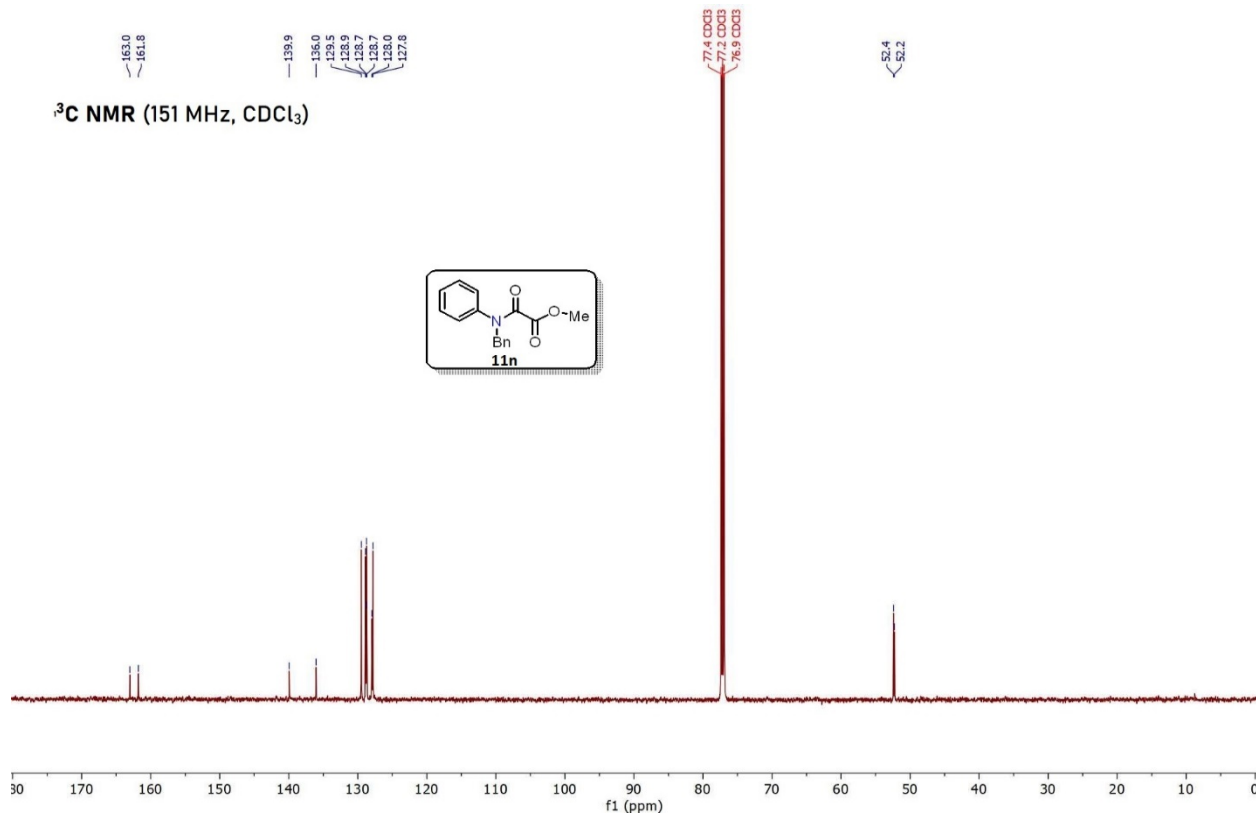

<sup>1</sup>H NMR (300 MHz, CDCl<sub>3</sub>)

7.41  
7.38  
7.36  
7.35  
7.30  
7.29  
7.28  
7.26

3.61

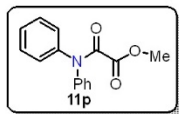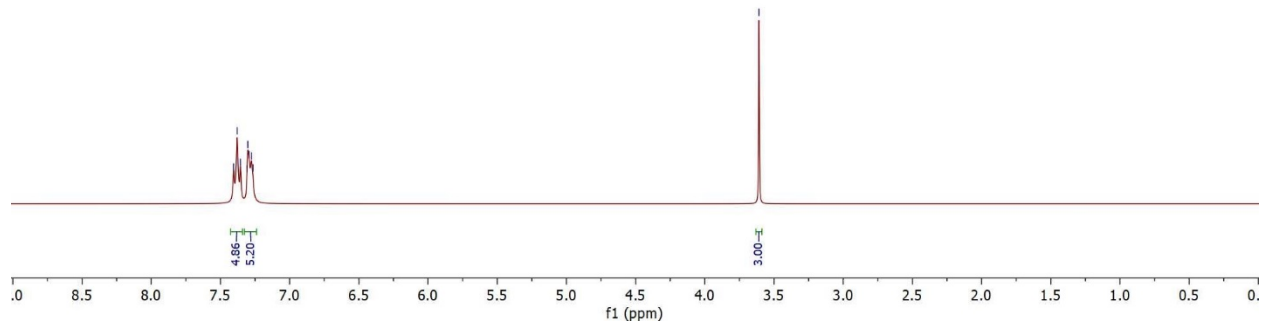

<sup>13</sup>C NMR (101 MHz, CDCl<sub>3</sub>)

163.1

161.1

140.6

140.5

129.8

129.3

128.7

127.9

127.2

125.9

77.5 CDCl<sub>3</sub>

77.2 CDCl<sub>3</sub>

76.8 CDCl<sub>3</sub>

51.5

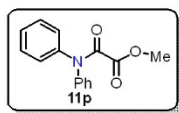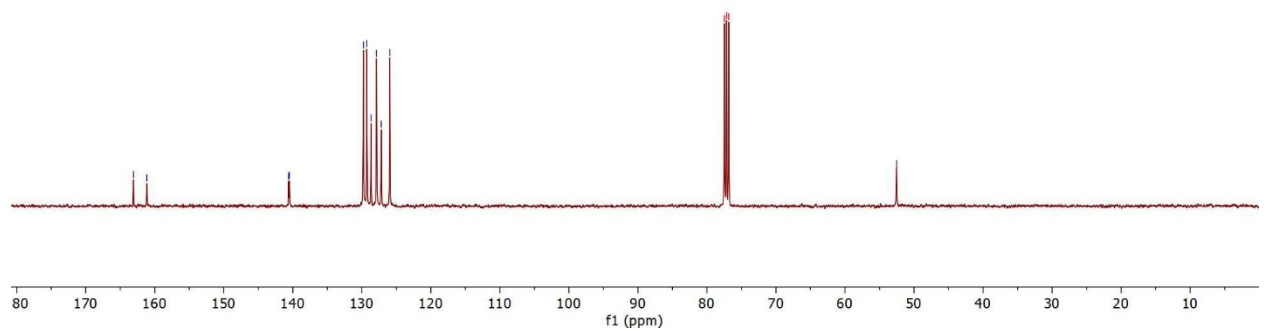

<sup>1</sup>H NMR (300 MHz, CDCl<sub>3</sub>)

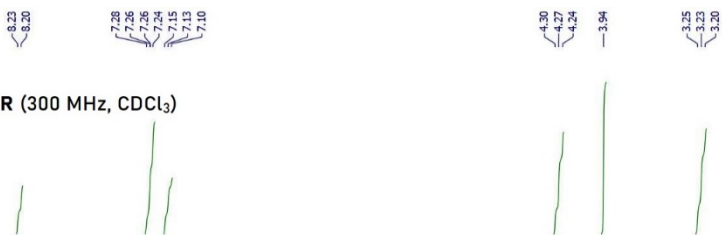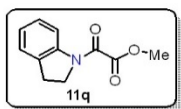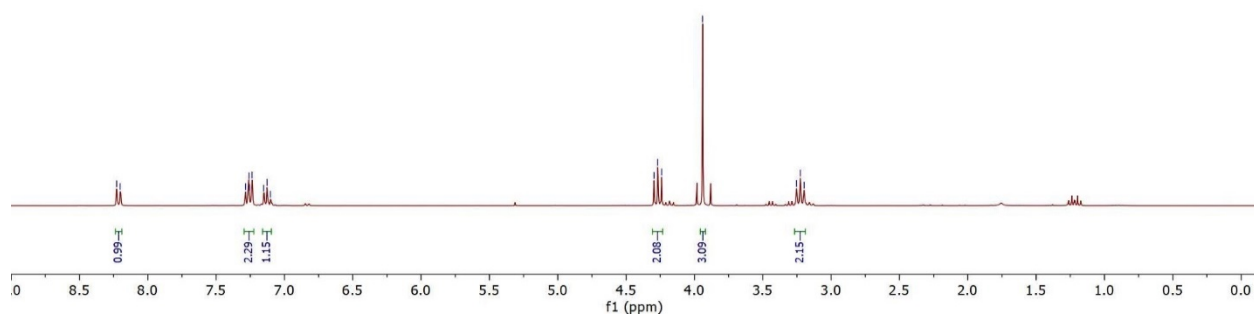

<sup>13</sup>C NMR (151 MHz, CDCl<sub>3</sub>)

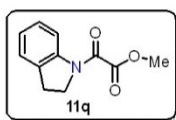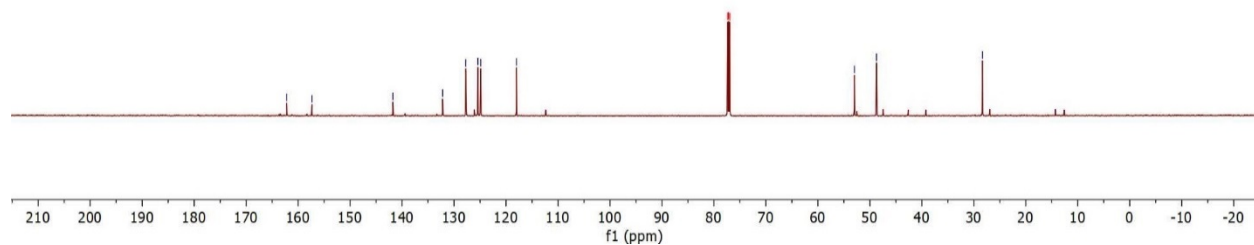

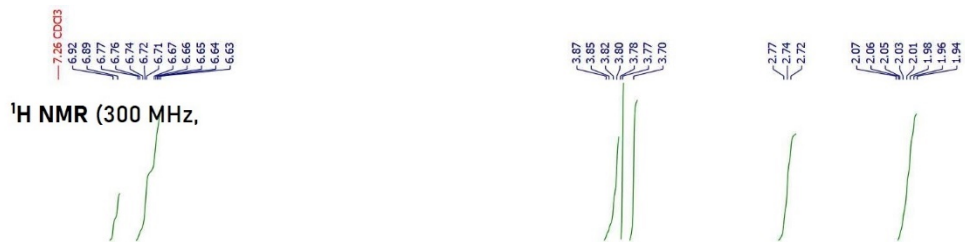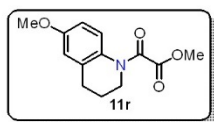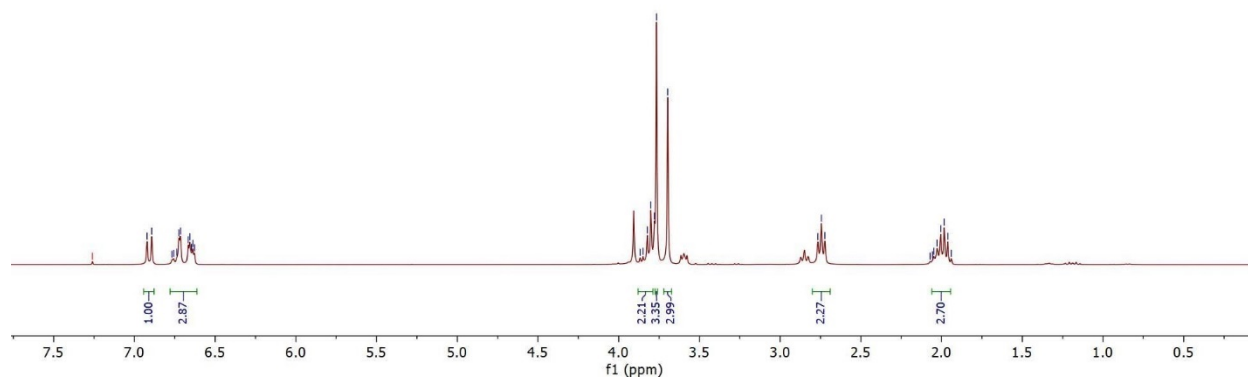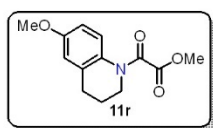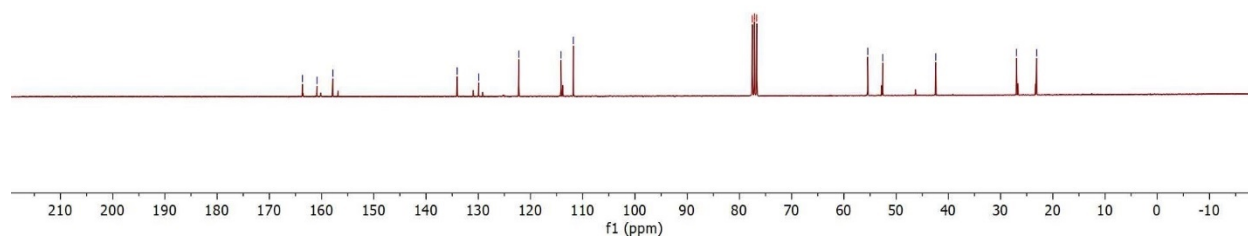

<sup>1</sup>H NMR (300 MHz, CDCl<sub>3</sub>)

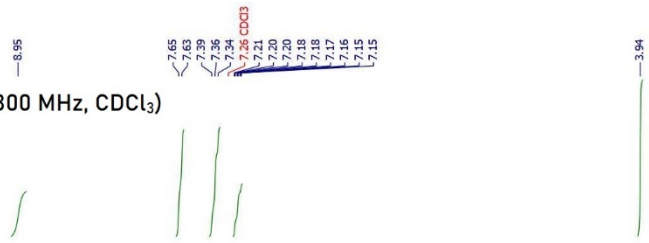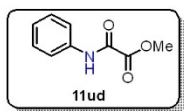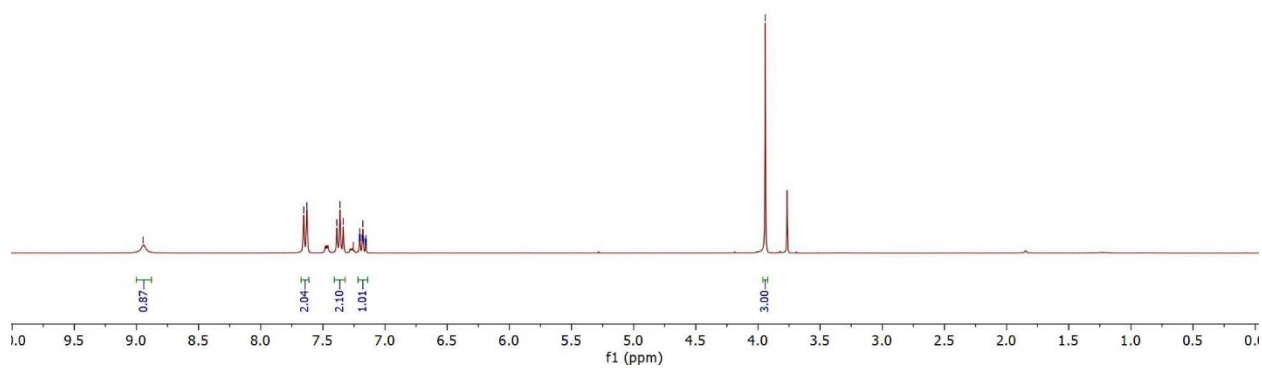

<sup>13</sup>C NMR (75 MHz, CDCl<sub>3</sub>)

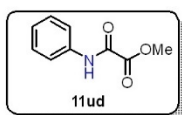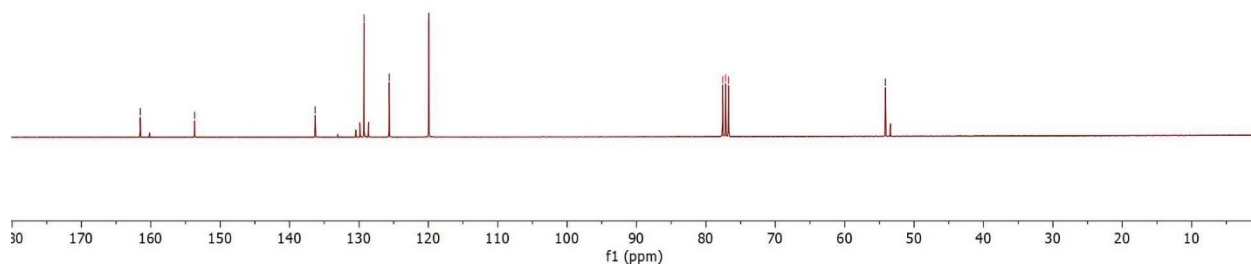

**<sup>1</sup>H NMR (300 MHz, CDCl<sub>3</sub>)**

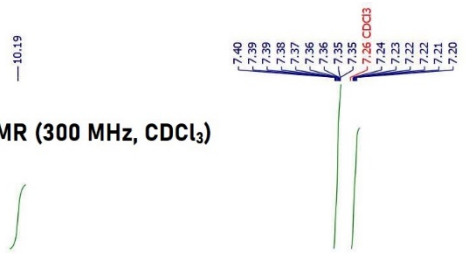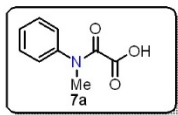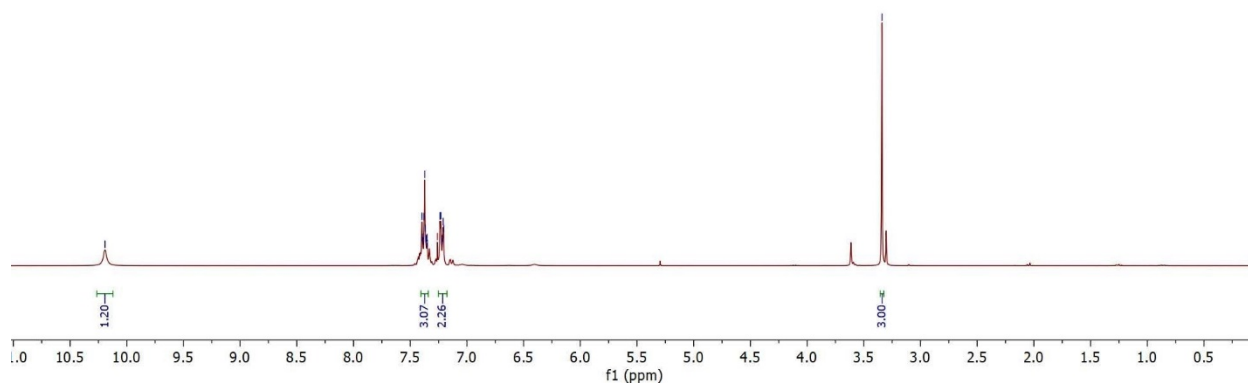

**<sup>13</sup>C NMR (101 MHz, CDCl<sub>3</sub>)**

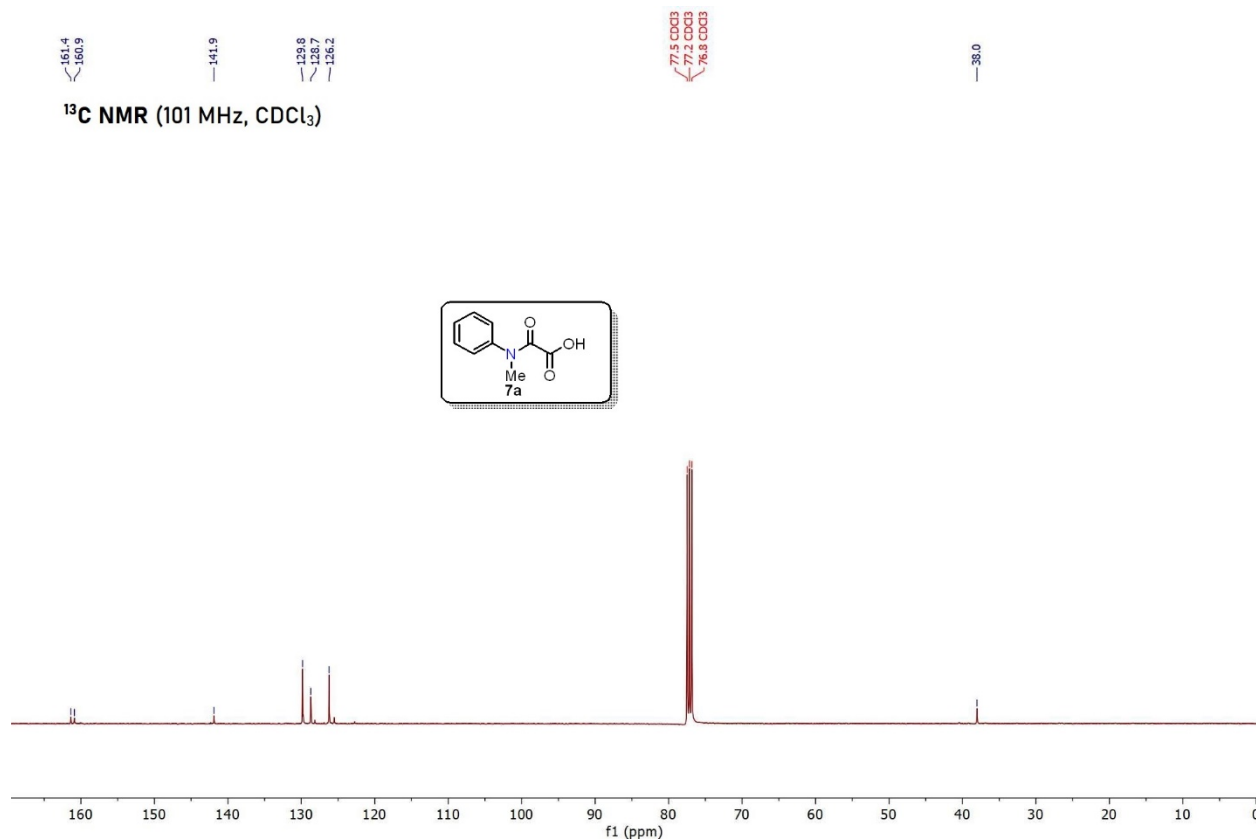

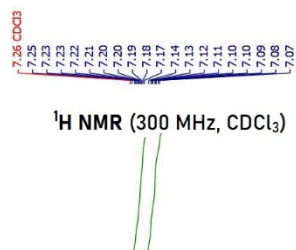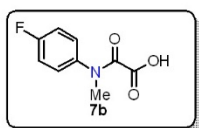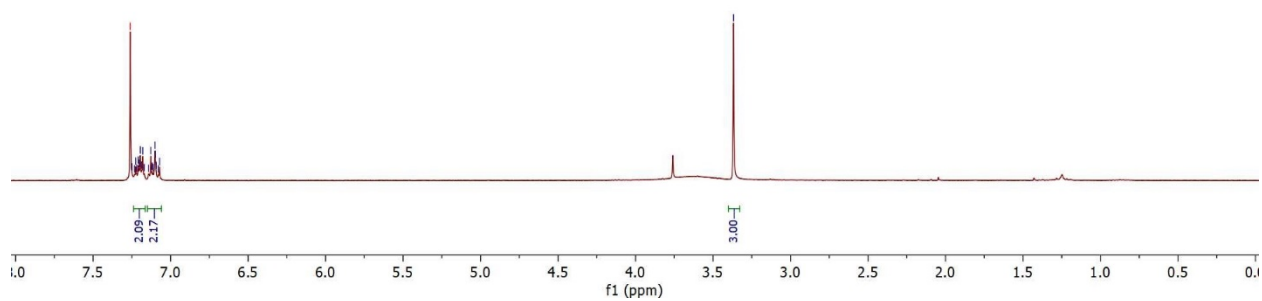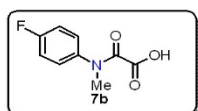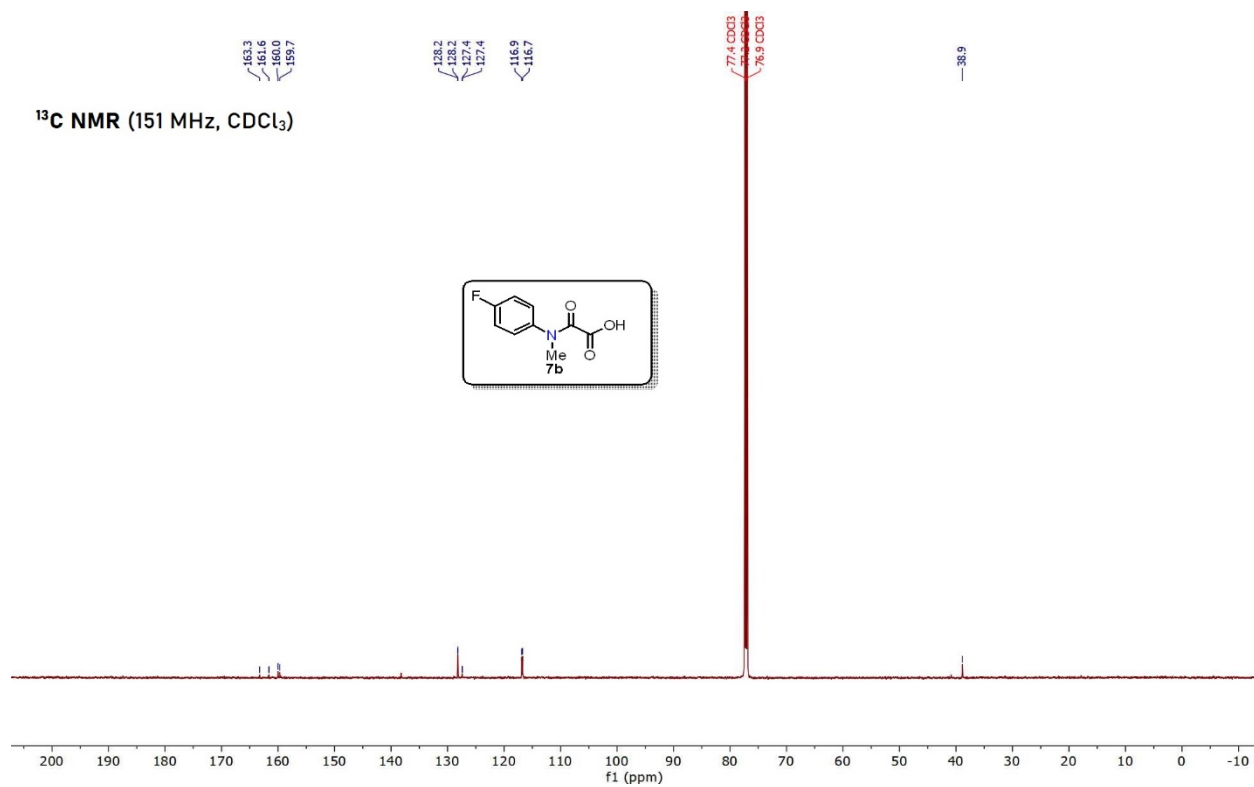



<sup>1</sup>H NMR (300 MHz, CDCl<sub>3</sub>)

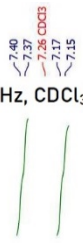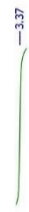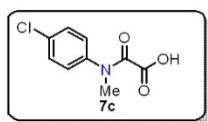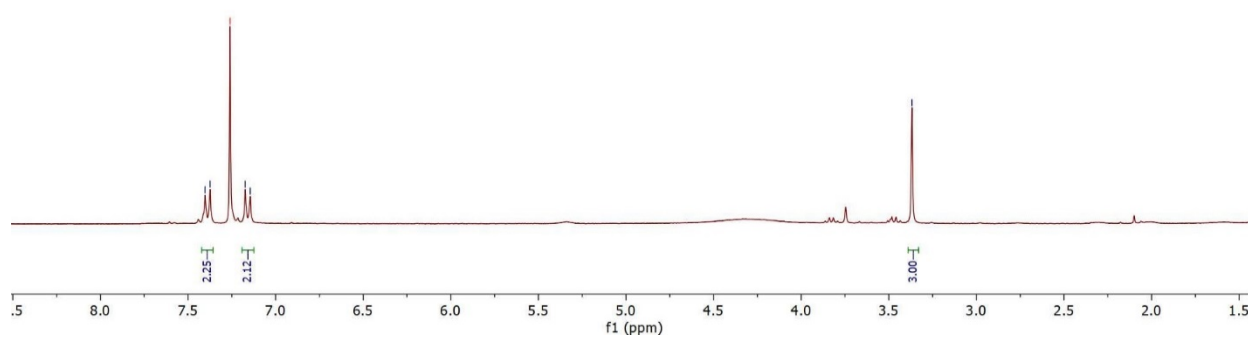

<sup>13</sup>C NMR (101 MHz, CDCl<sub>3</sub>)

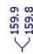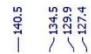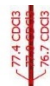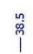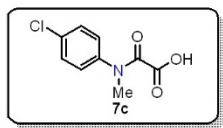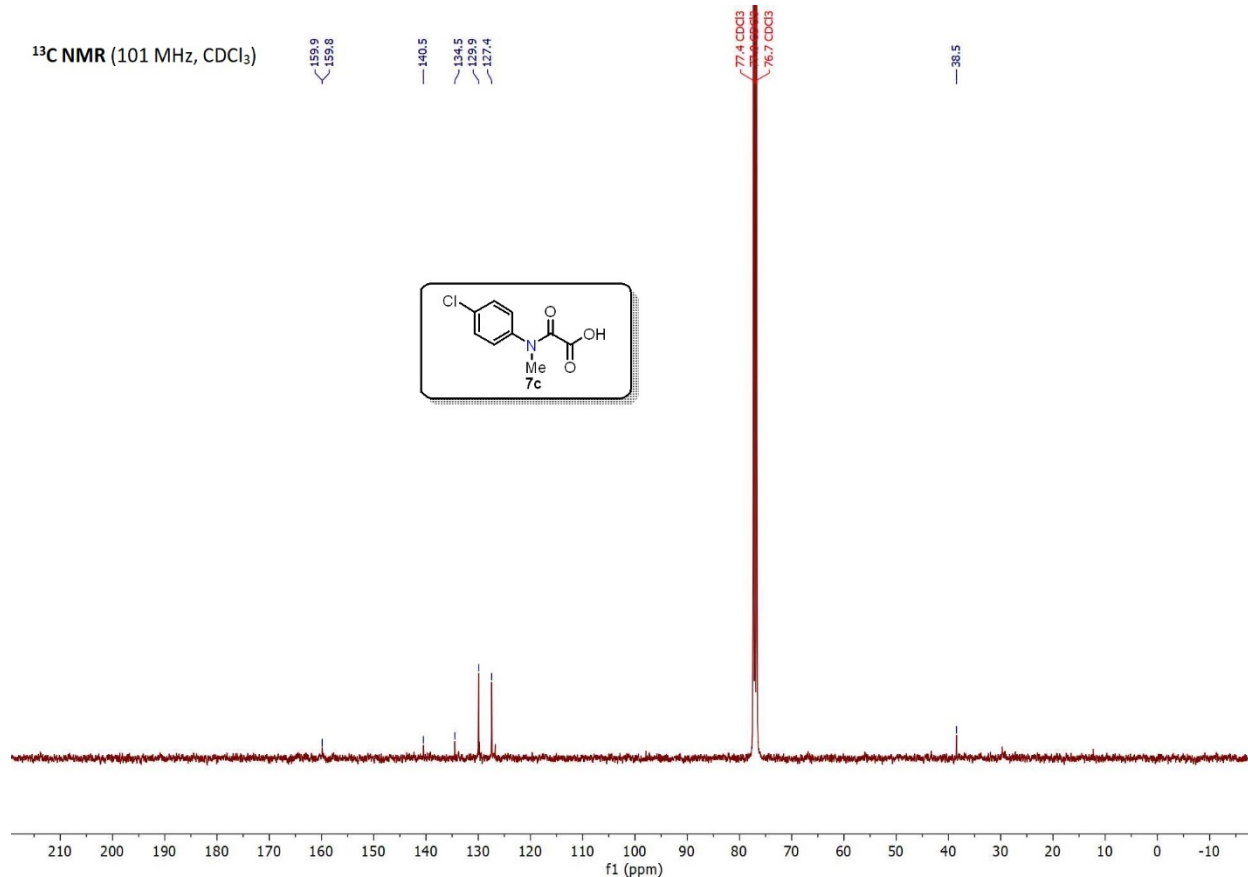

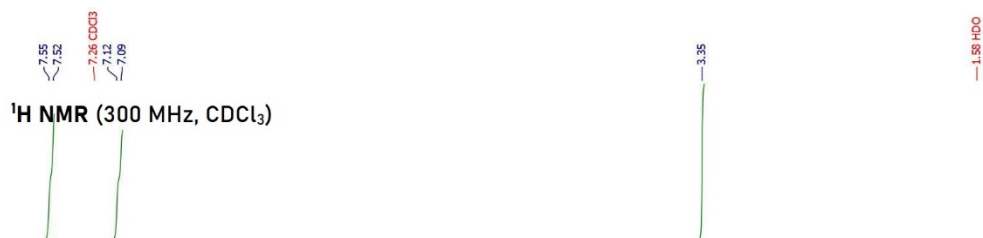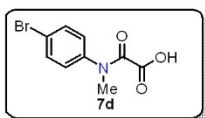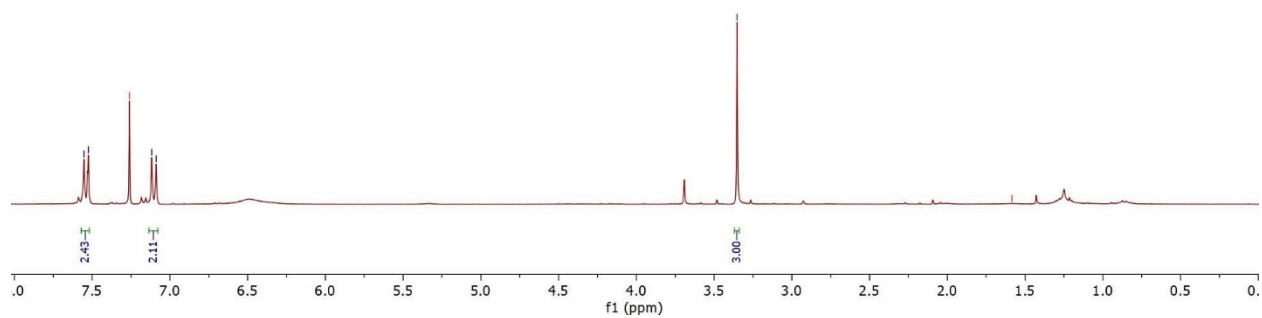

<sup>13</sup>C NMR (101 MHz, CDCl<sub>3</sub>)

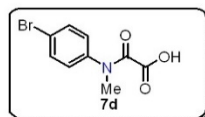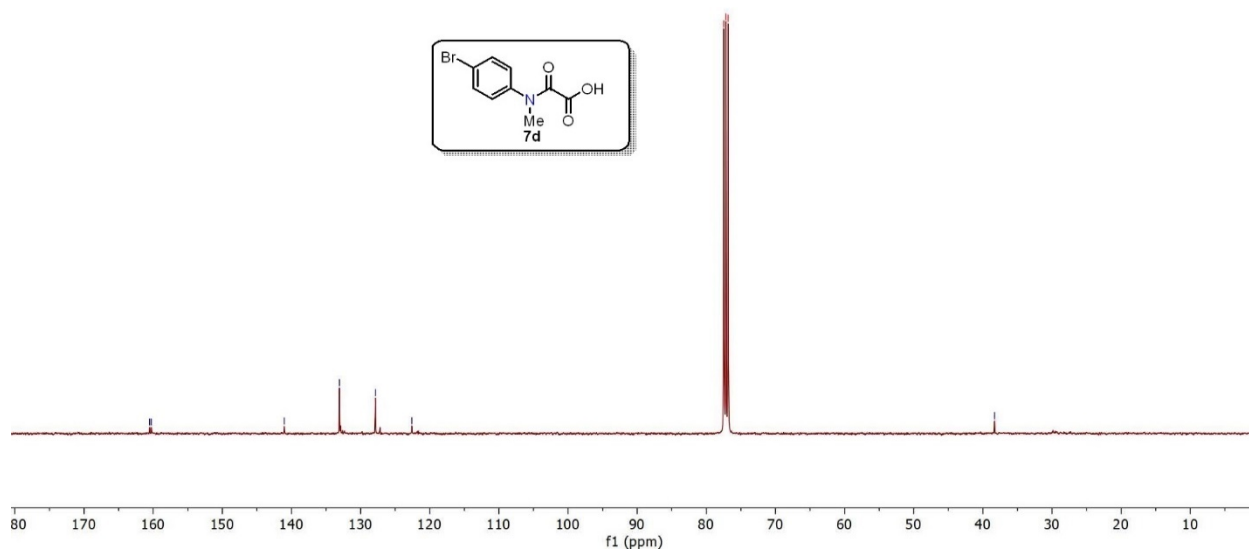

<sup>1</sup>H NMR (300 MHz, CDCl<sub>3</sub>)

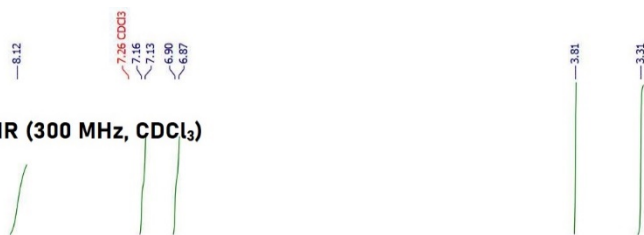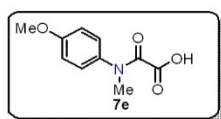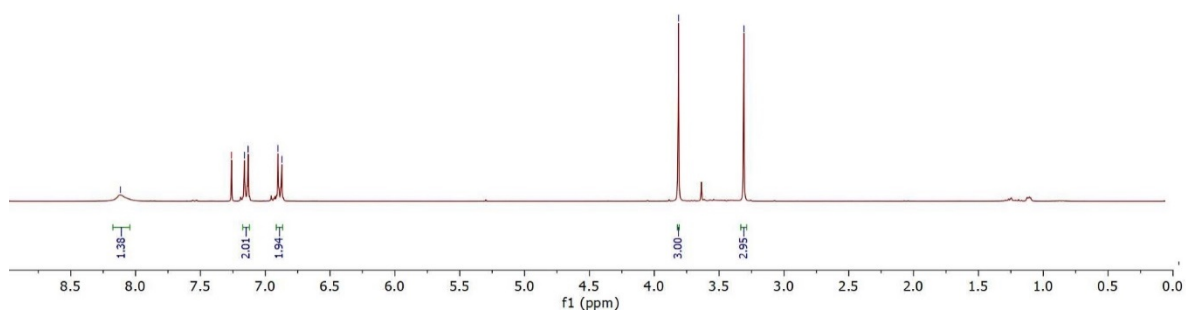

<sup>13</sup>C NMR (101 MHz, CDCl<sub>3</sub>)

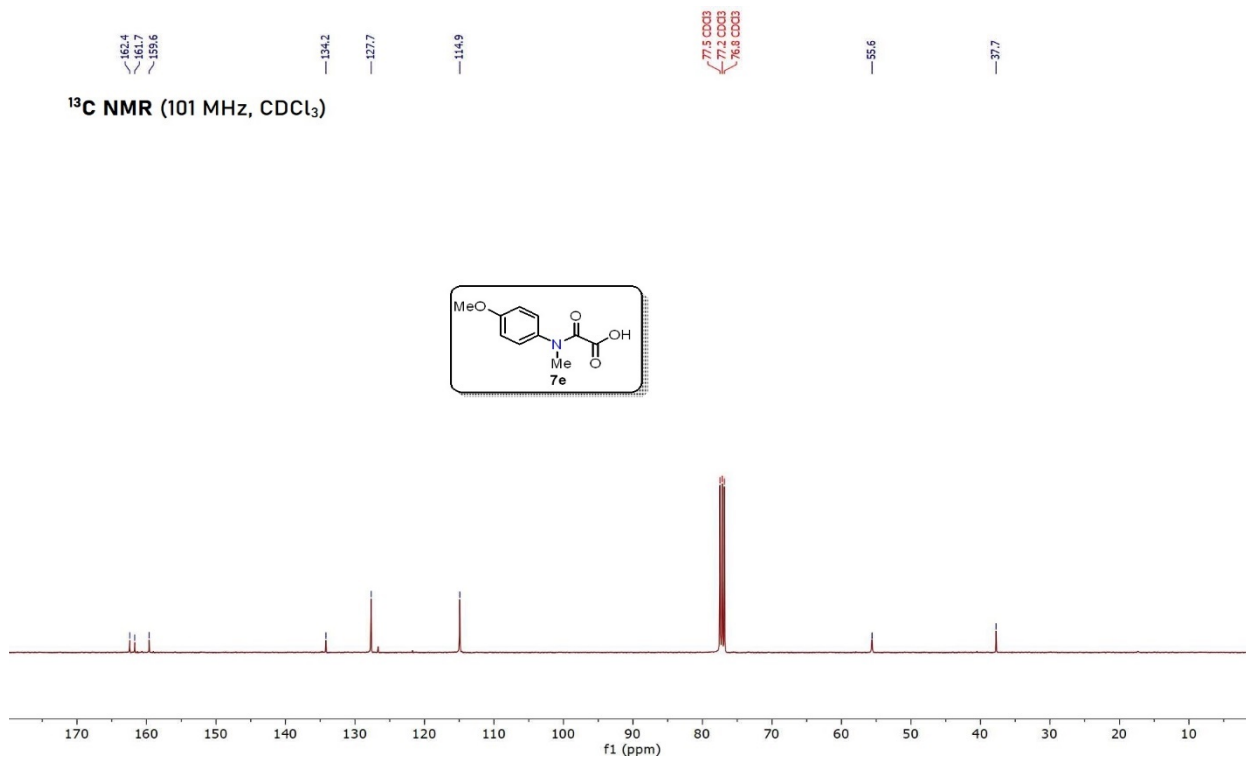

CMM0839.19102.fid  
CMM-839 in CDCl<sub>3</sub>  
1H Spectrum

<sup>1</sup>H NMR (600 MHz, CDCl<sub>3</sub>)

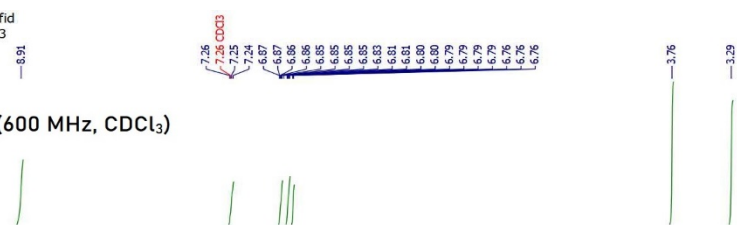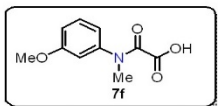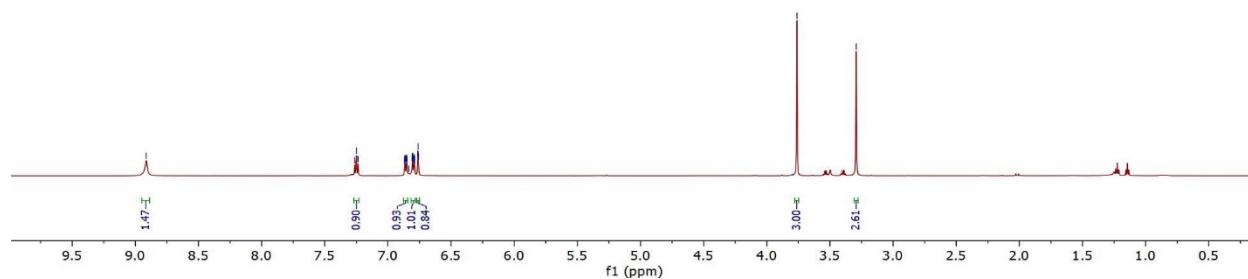

<sup>13</sup>C NMR (151 MHz, CDCl<sub>3</sub>)

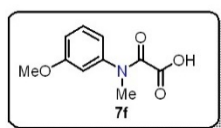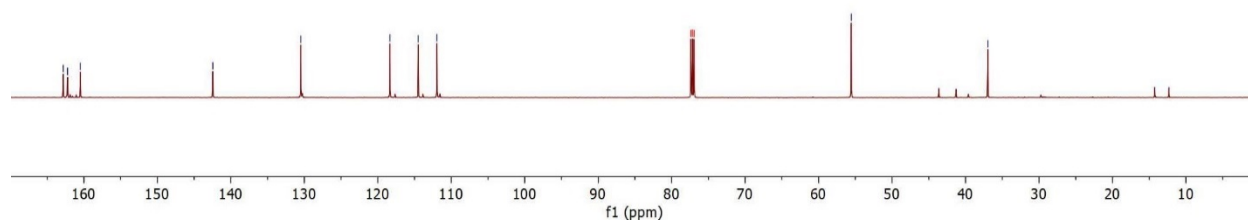

<sup>1</sup>H NMR (300 MHz, CDCl<sub>3</sub>)

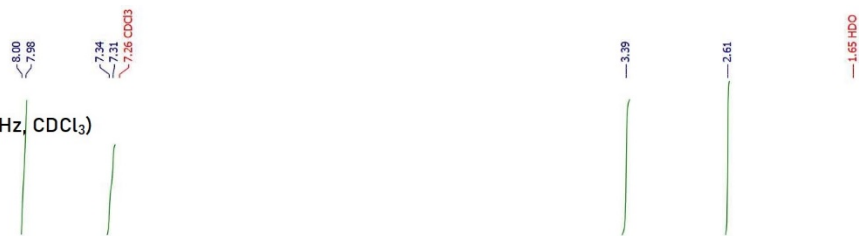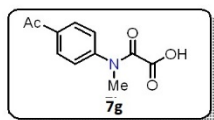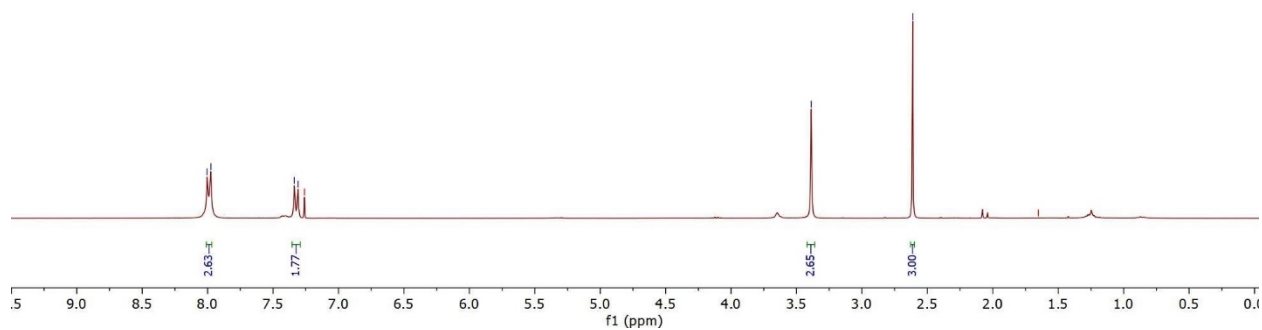

<sup>13</sup>C NMR (75 MHz, CDCl<sub>3</sub>)

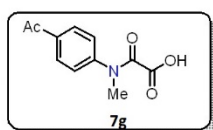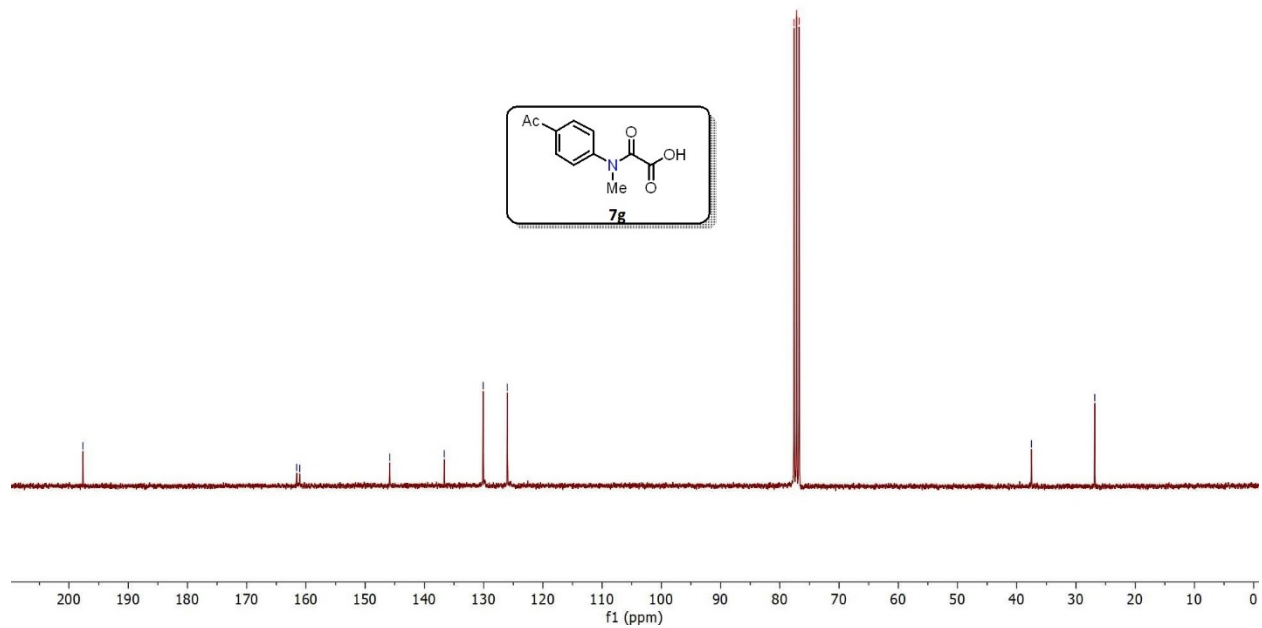

$^1\text{H NMR}$  (300 MHz, DMSO-

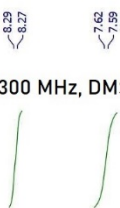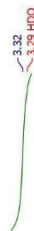

— 2.50 DMSO

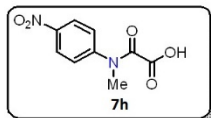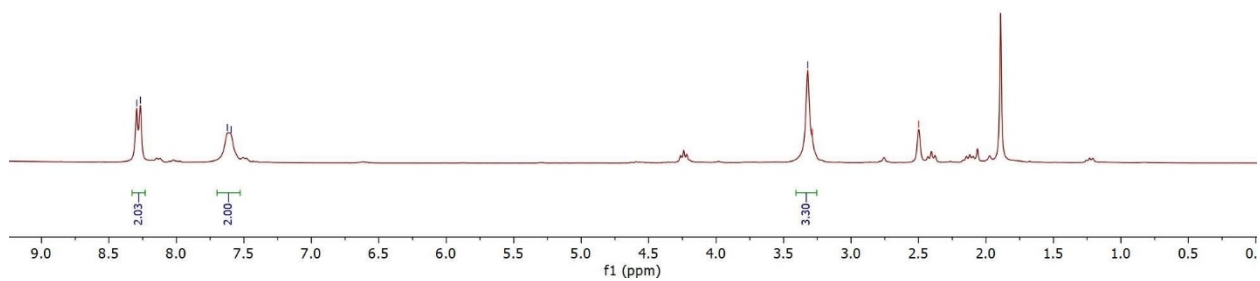

— 172.3  
— 164.1  
— 162.7  
— 161.1

— 126.5  
— 125.0

— 40.4 DMSO  
— 40.1 DMSO  
— 39.8 DMSO  
— 39.5 DMSO  
— 39.2 DMSO  
— 38.9 DMSO  
— 38.7 DMSO

— 21.3

$^{13}\text{C NMR}$  (75 MHz, DMSO- $d_6$ )

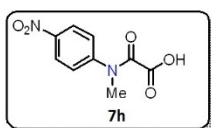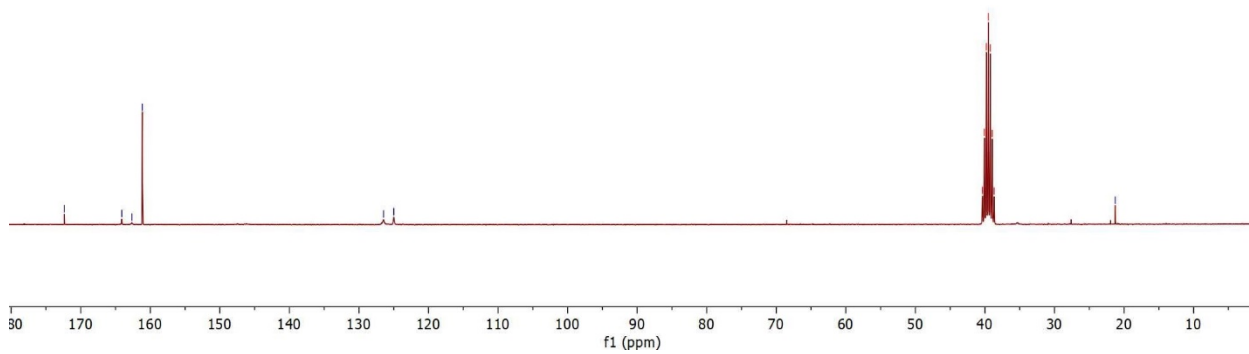

<sup>1</sup>H NMR (600 MHz, DMSO-*d*<sub>6</sub>)

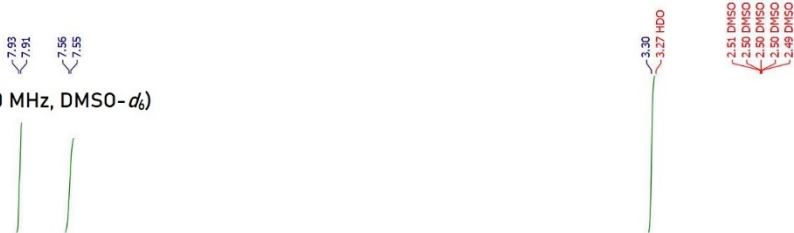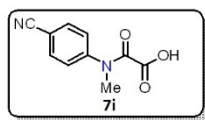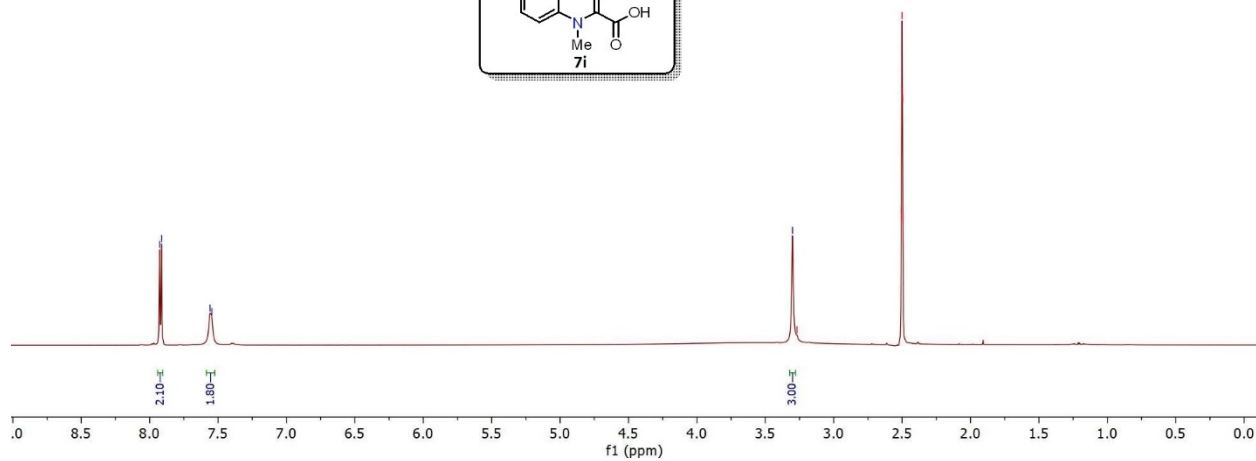

<sup>13</sup>C NMR (151 MHz, DMSO-*d*<sub>6</sub>)

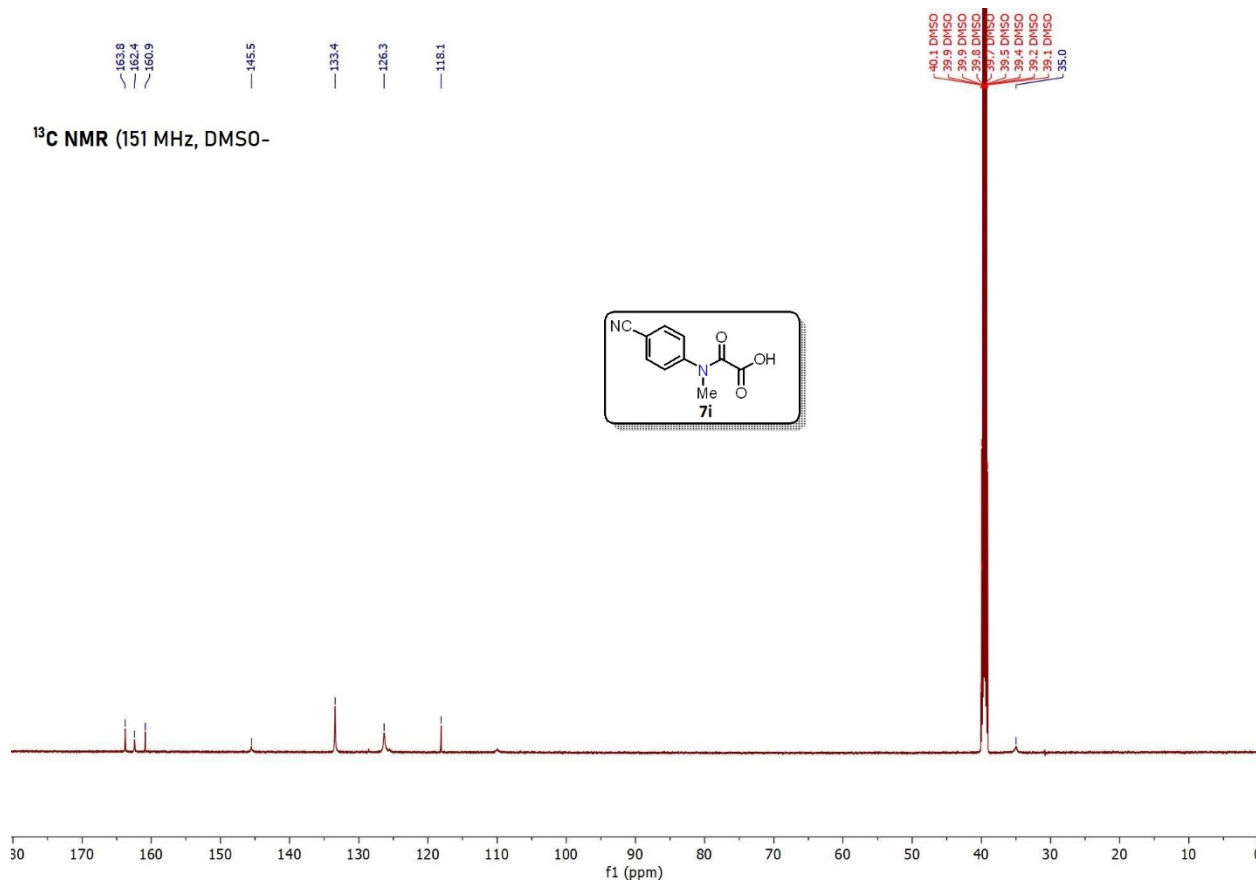

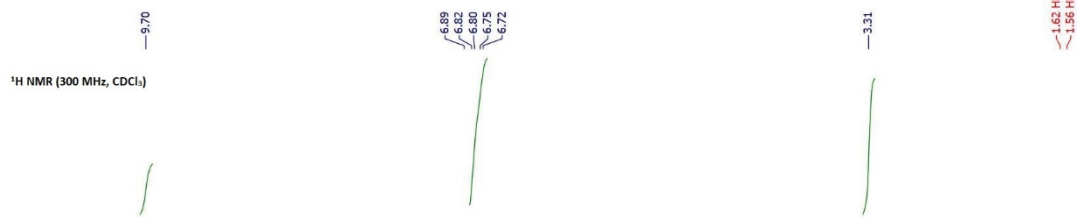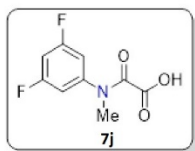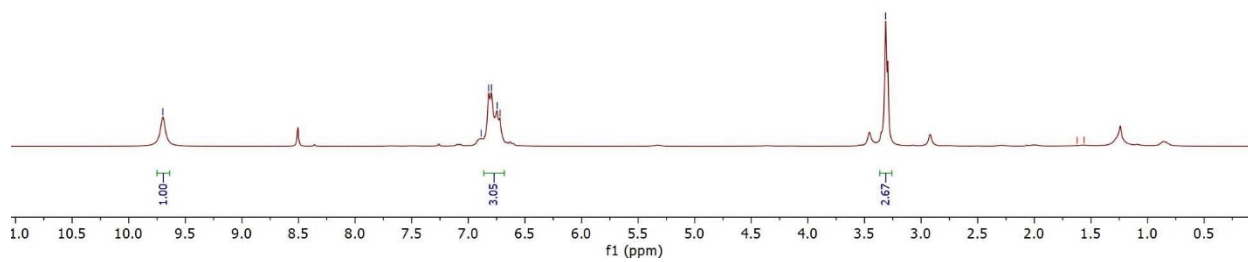

<sup>19</sup>F NMR (377 MHz, CDCl<sub>3</sub>)

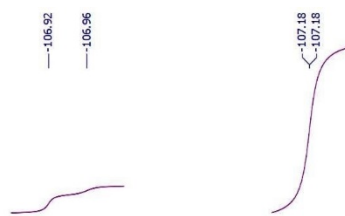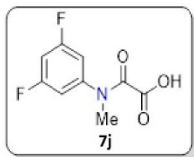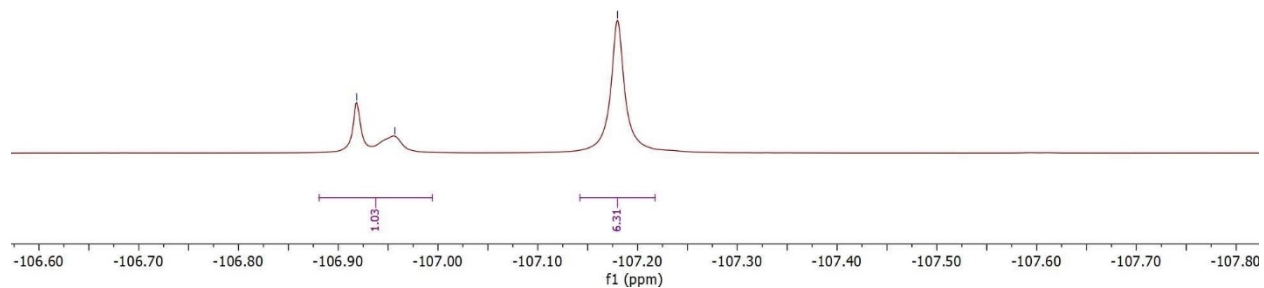



<sup>13</sup>C NMR (101 MHz, CDCl<sub>3</sub>)

164.47  
164.33  
163.16  
162.67  
161.98  
161.84

144.08  
143.97  
143.85  
143.73

109.98  
109.71  
105.39  
105.11  
104.54  
104.29  
104.04  
102.44  
101.95  
101.96

77.48 CDCl<sub>3</sub>  
77.16 CDCl<sub>3</sub>  
76.84 CDCl<sub>3</sub>

36.92

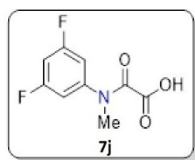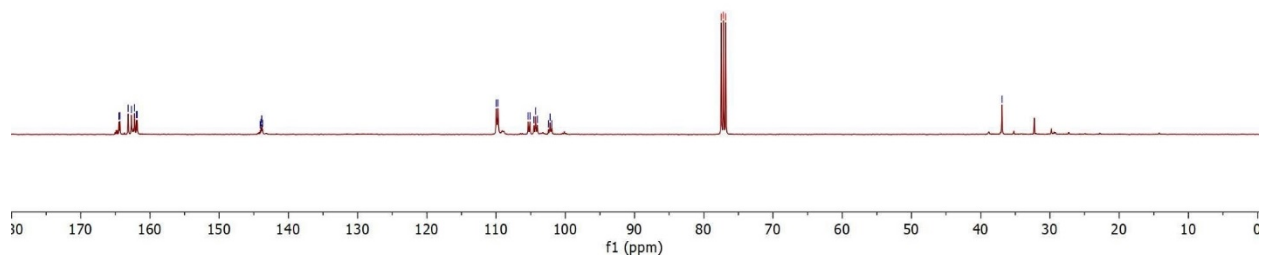

<sup>1</sup>H NMR (300 MHz, CDCl<sub>3</sub>)

7.50  
7.48  
7.46  
7.47  
7.35  
7.34  
7.34 CDCl<sub>3</sub>  
7.08  
7.08  
7.07  
7.07

3.35

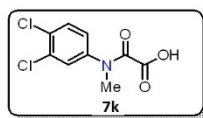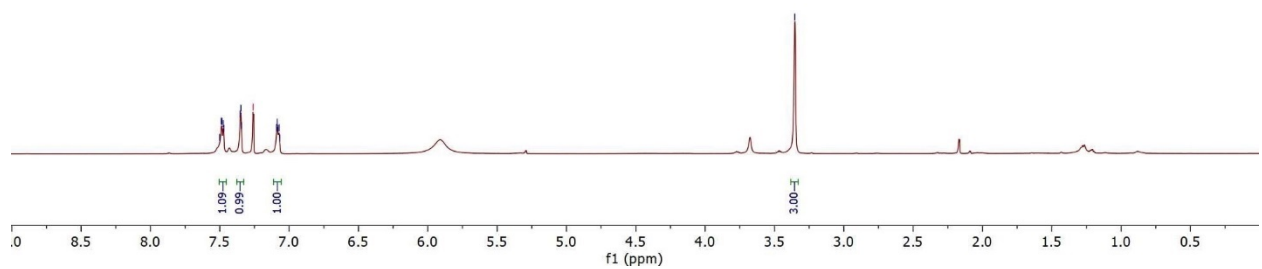

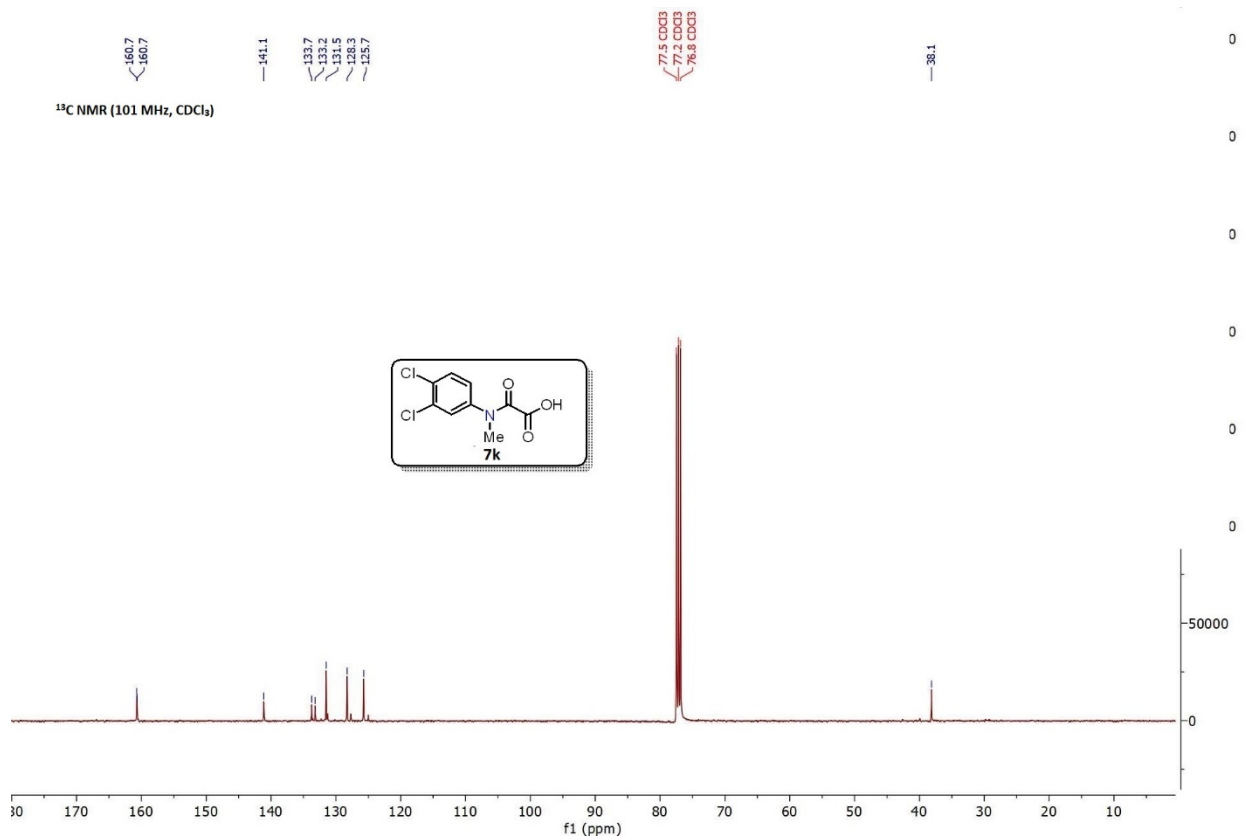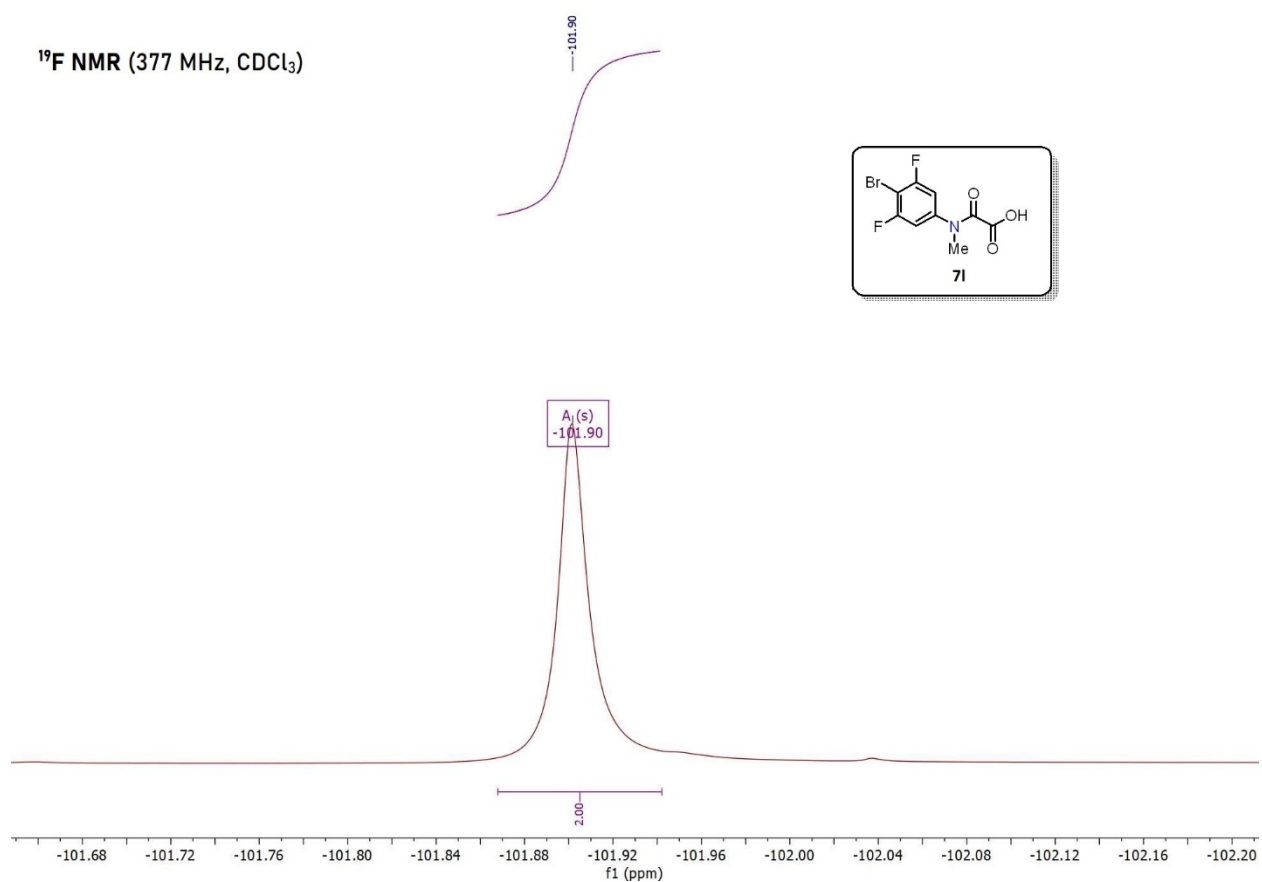

<sup>1</sup>H NMR (300 MHz, CDCl<sub>3</sub>)

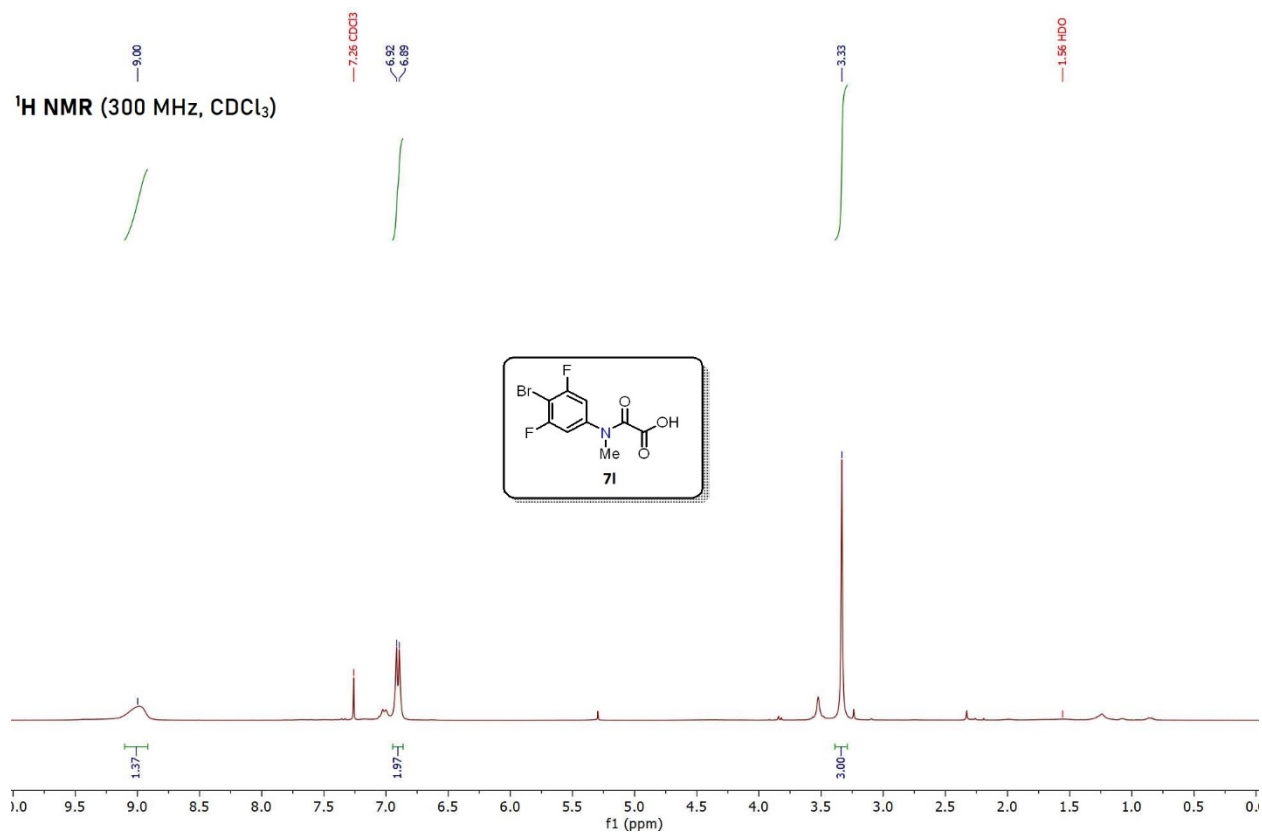

<sup>13</sup>C NMR (75 MHz, CDCl<sub>3</sub>)

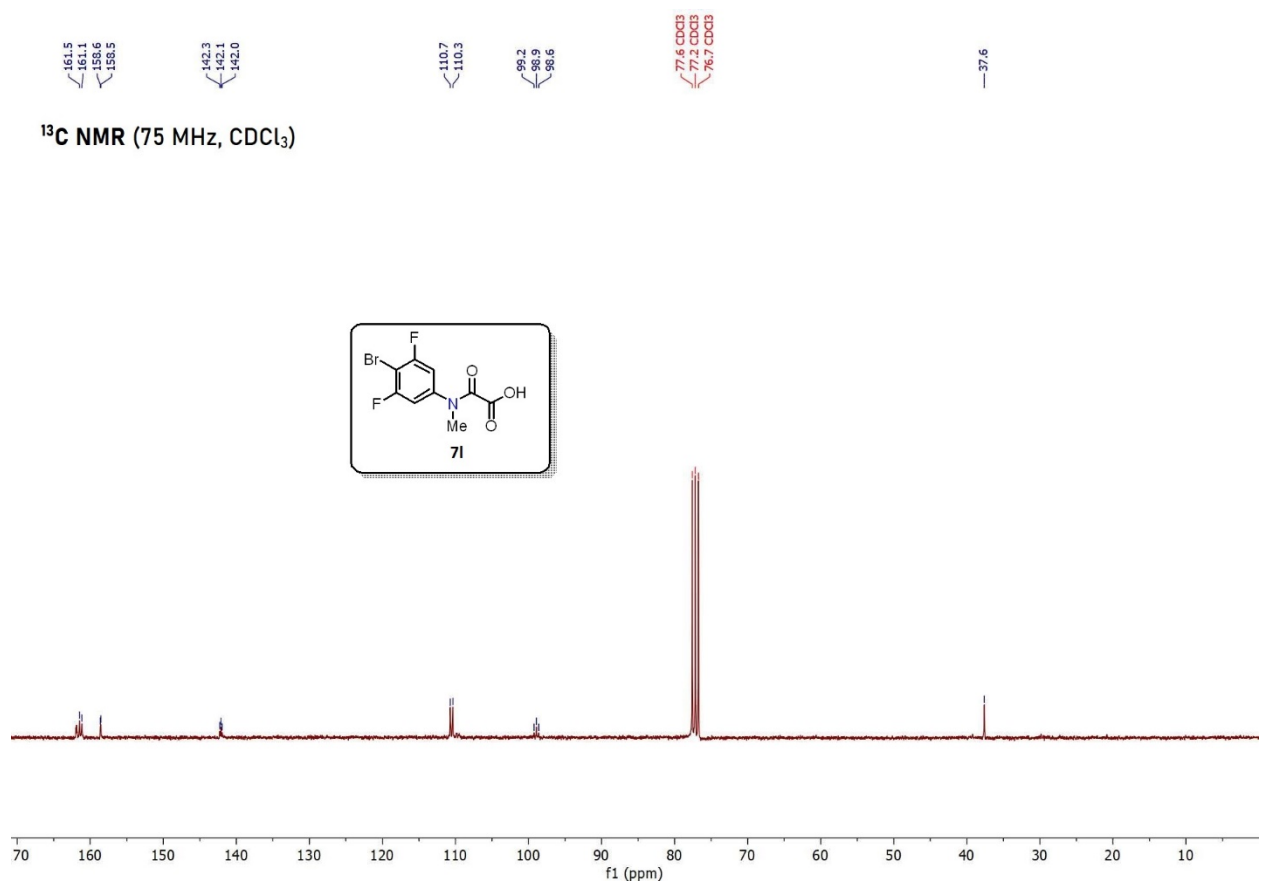

<sup>1</sup>H NMR (300 MHz, DMSO-*d*<sub>6</sub>)

7.38  
7.36  
7.33  
7.30  
7.28  
7.24  
7.20  
7.17  
7.00

4.94

3.98 H<sub>2</sub>O

2.50 DMSO

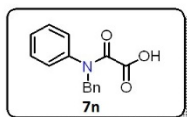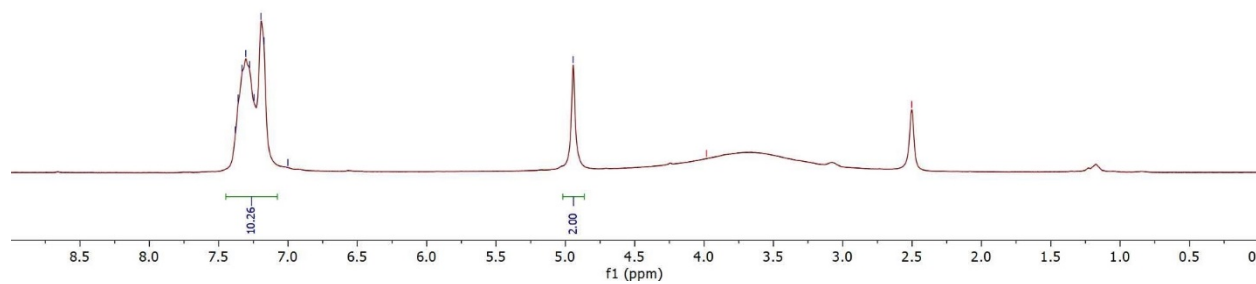

<sup>13</sup>C NMR (151 MHz, CDCl<sub>3</sub>)

162.1

161.2

139.8

135.4

135.4

128.8

128.7

128.6

127.9

127.4

77.2 CDCl<sub>3</sub>

77.0 CDCl<sub>3</sub>

76.8 CDCl<sub>3</sub>

53.4

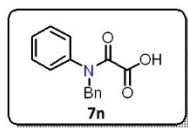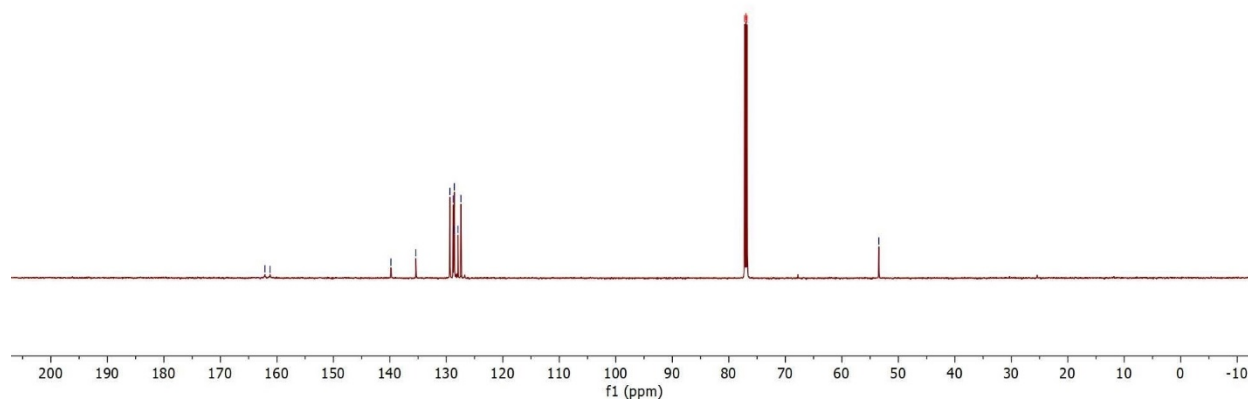

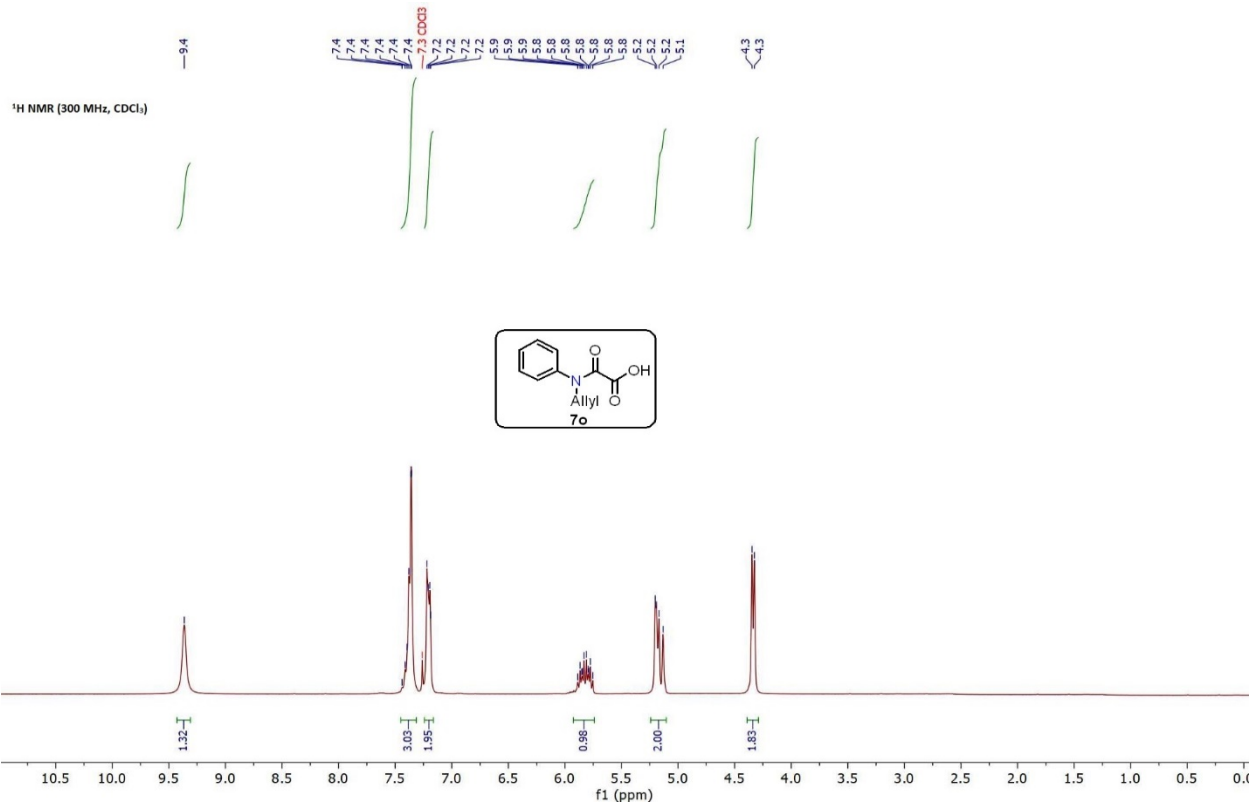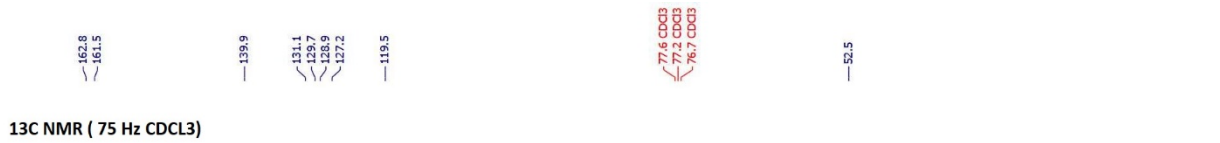

<sup>1</sup>H NMR (300 MHz, DMSO-*d*<sub>6</sub>)

7.48  
7.45  
7.43  
7.40  
7.39  
7.36  
7.33  
7.31  
7.28

2.50 DMSO

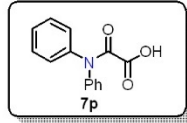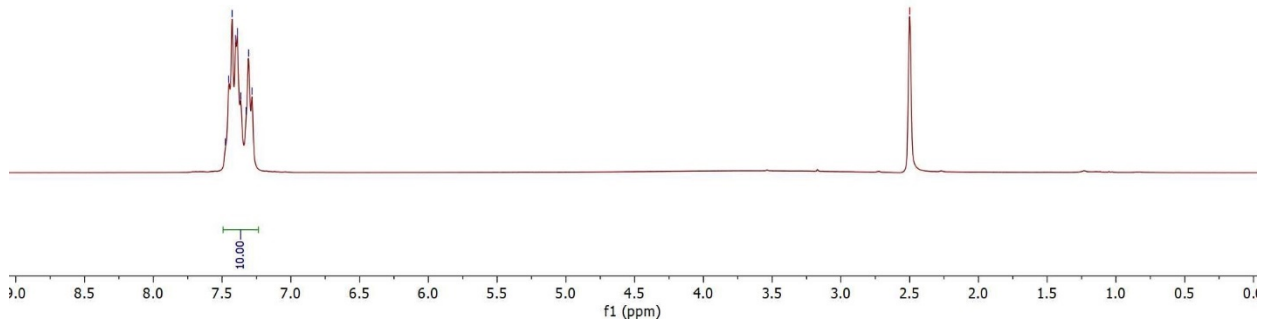

<sup>13</sup>C NMR (75 MHz, DMSO-*d*<sub>6</sub>)

164.1

162.4

140.6

140.5

129.7

129.3

128.5

128.1

127.2

126.5

40.4 DMSO  
39.8 DMSO  
39.5 DMSO  
39.2 DMSO  
39.0 DMSO  
38.7 DMSO

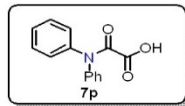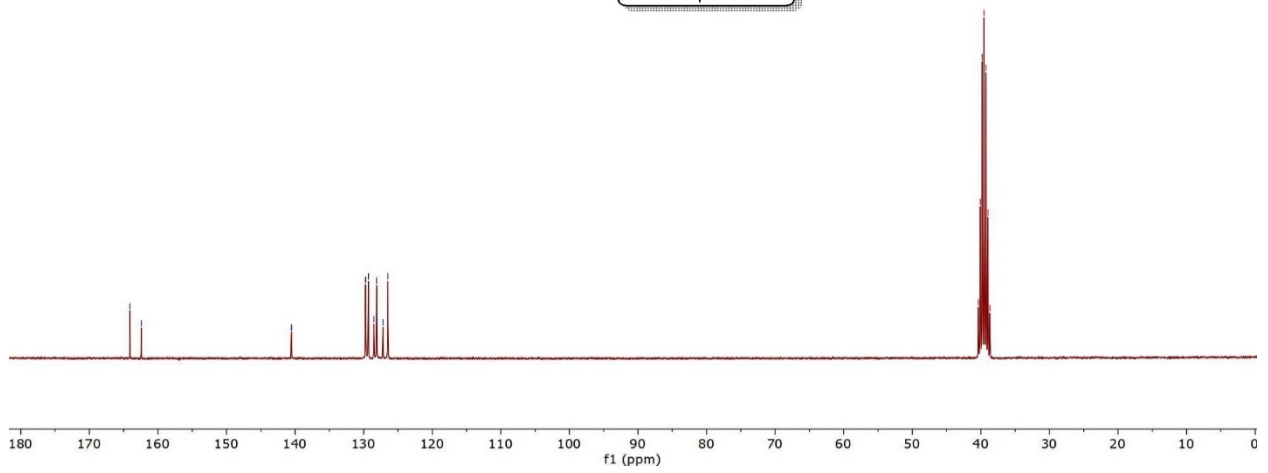

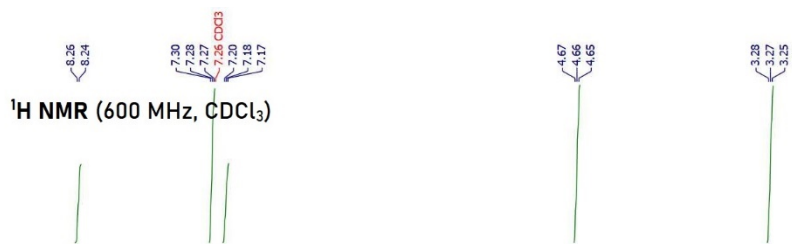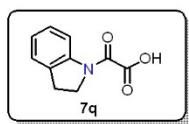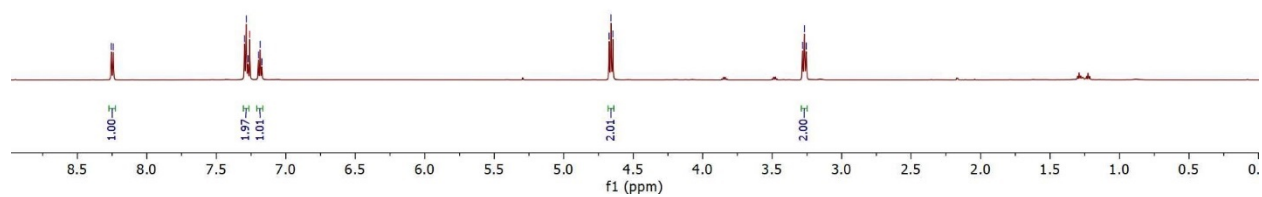

**<sup>13</sup>C NMR (151 MHz, CDCl<sub>3</sub>)**

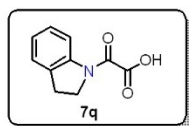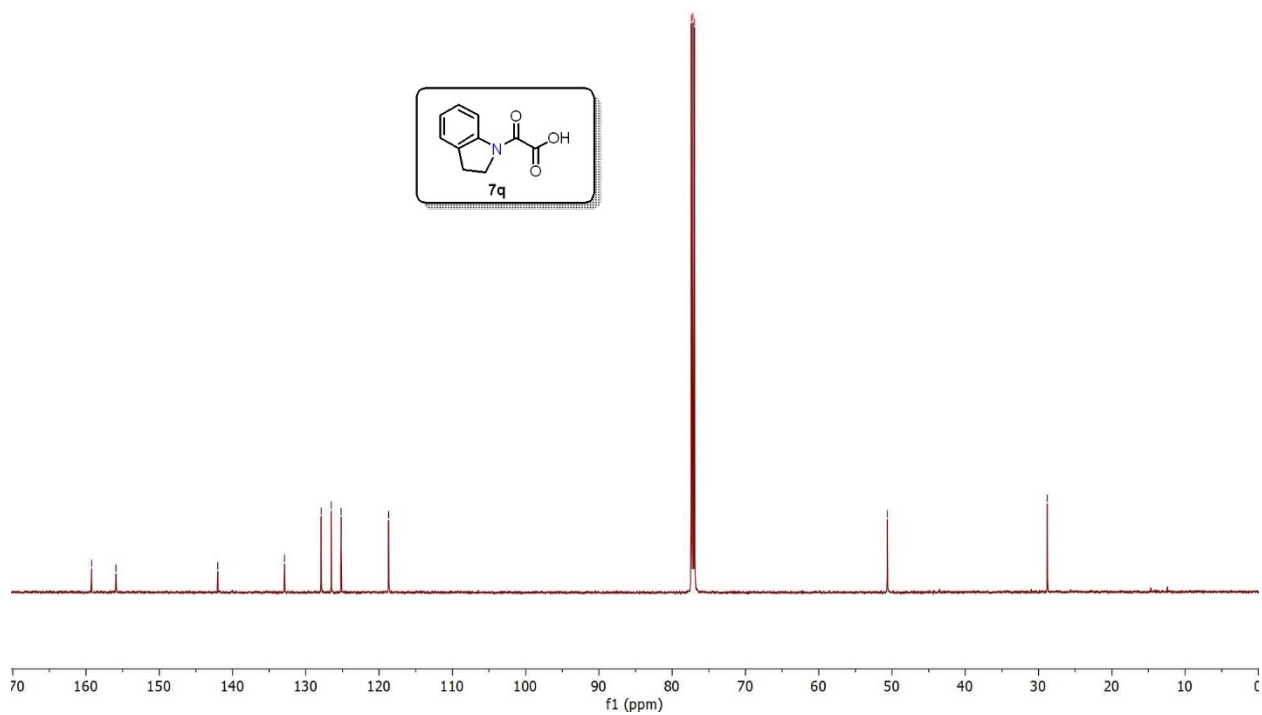

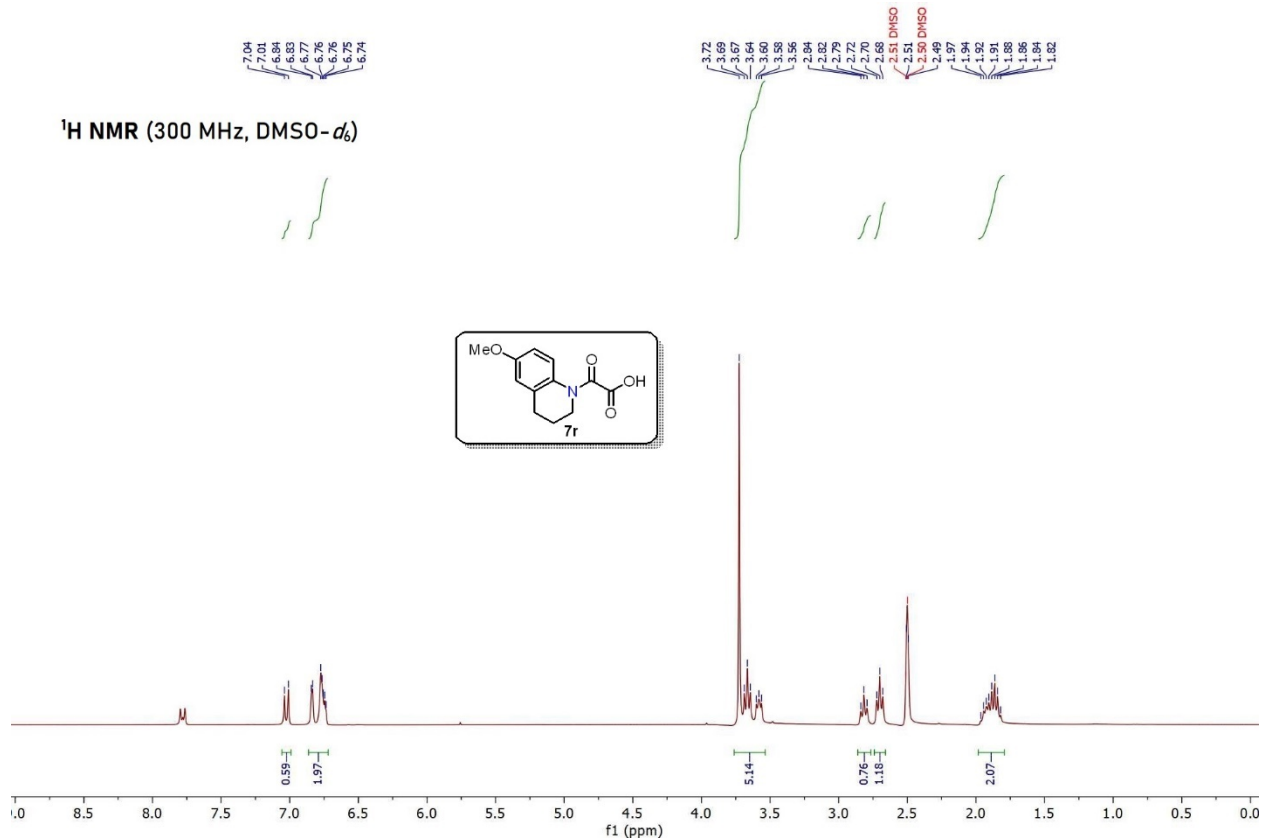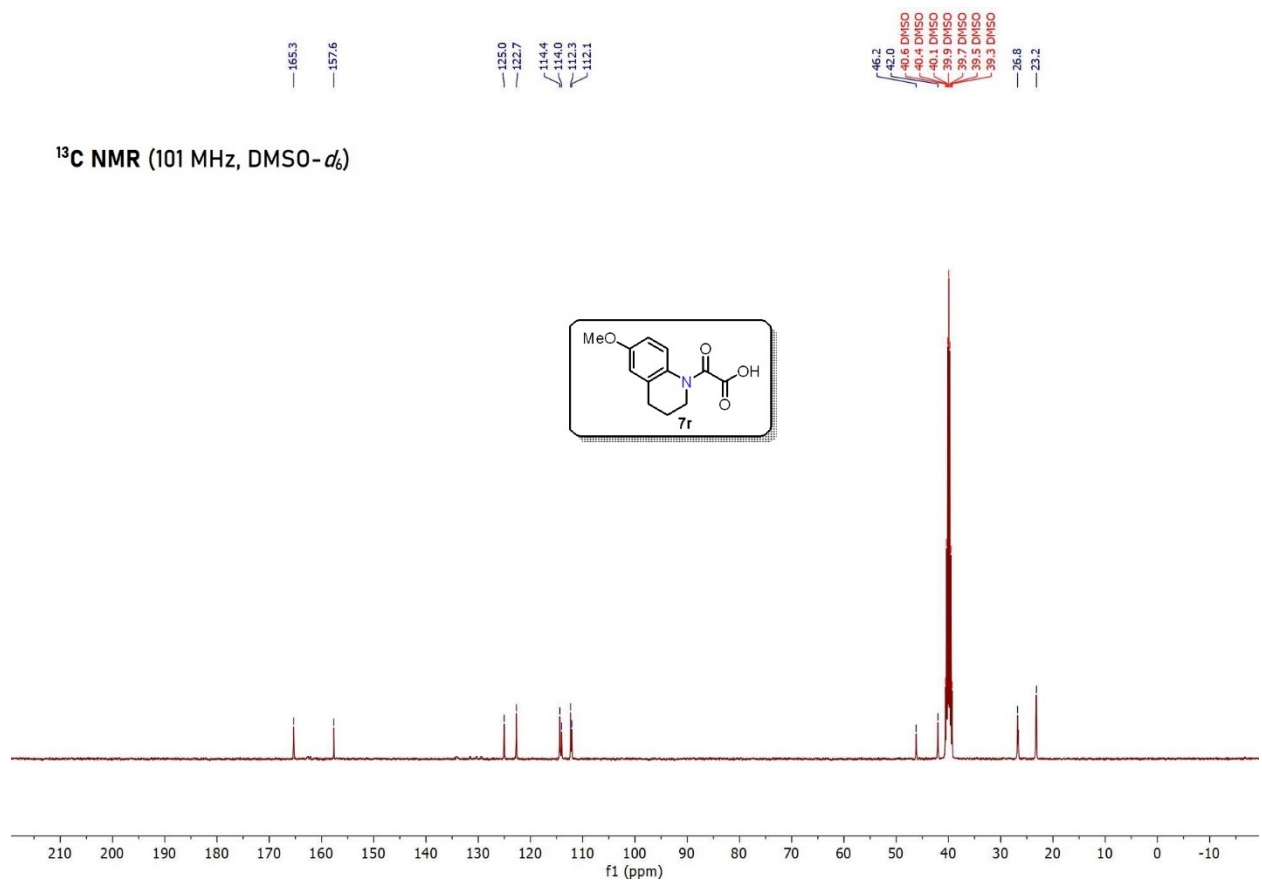



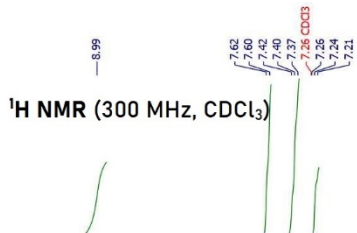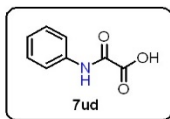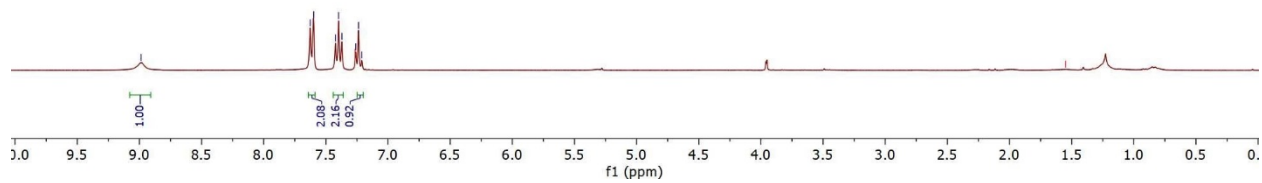

**<sup>13</sup>C NMR (101 MHz, CDCl<sub>3</sub>)**

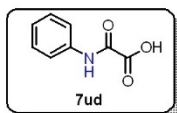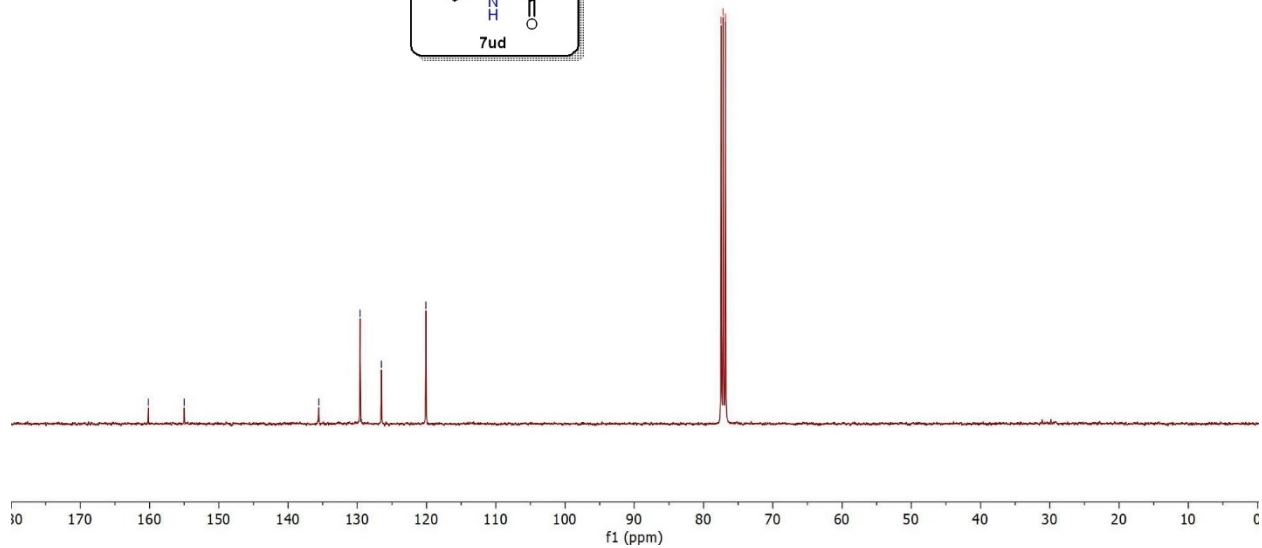

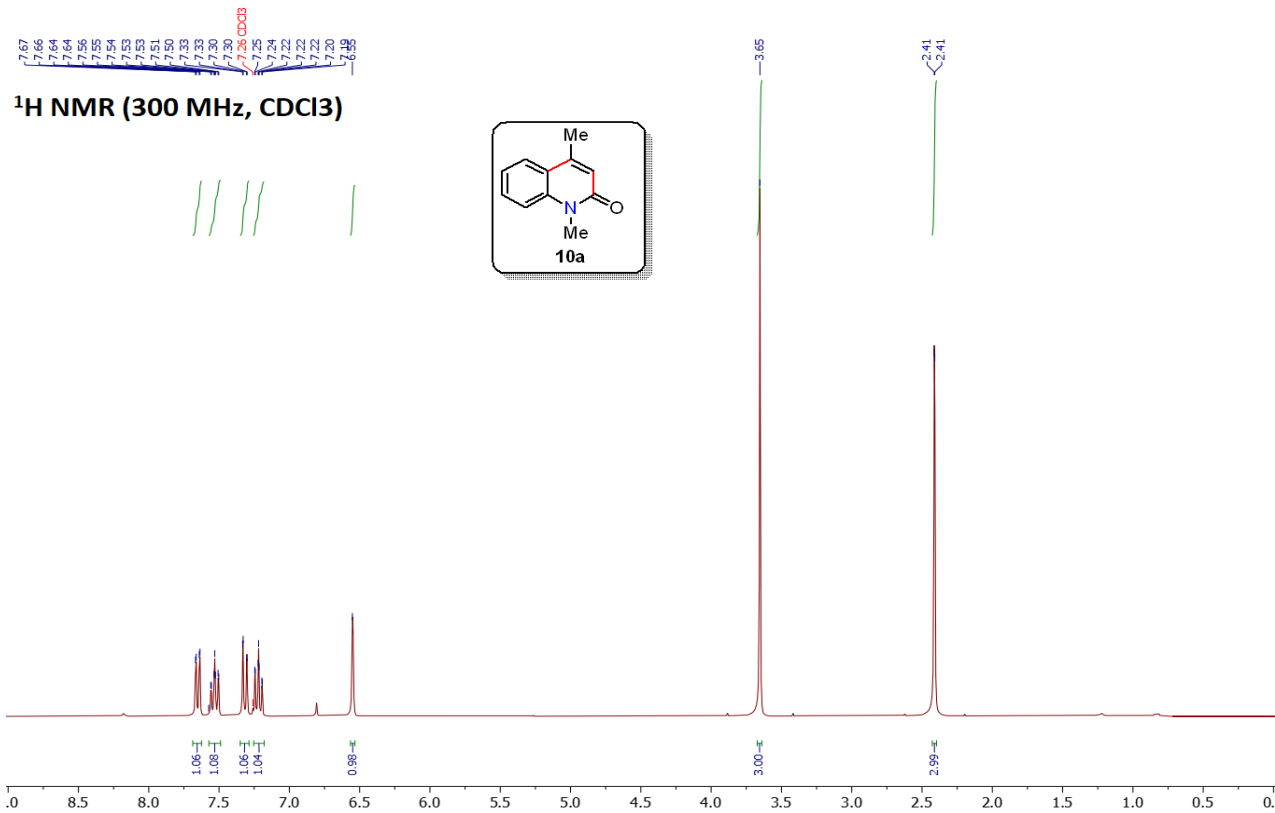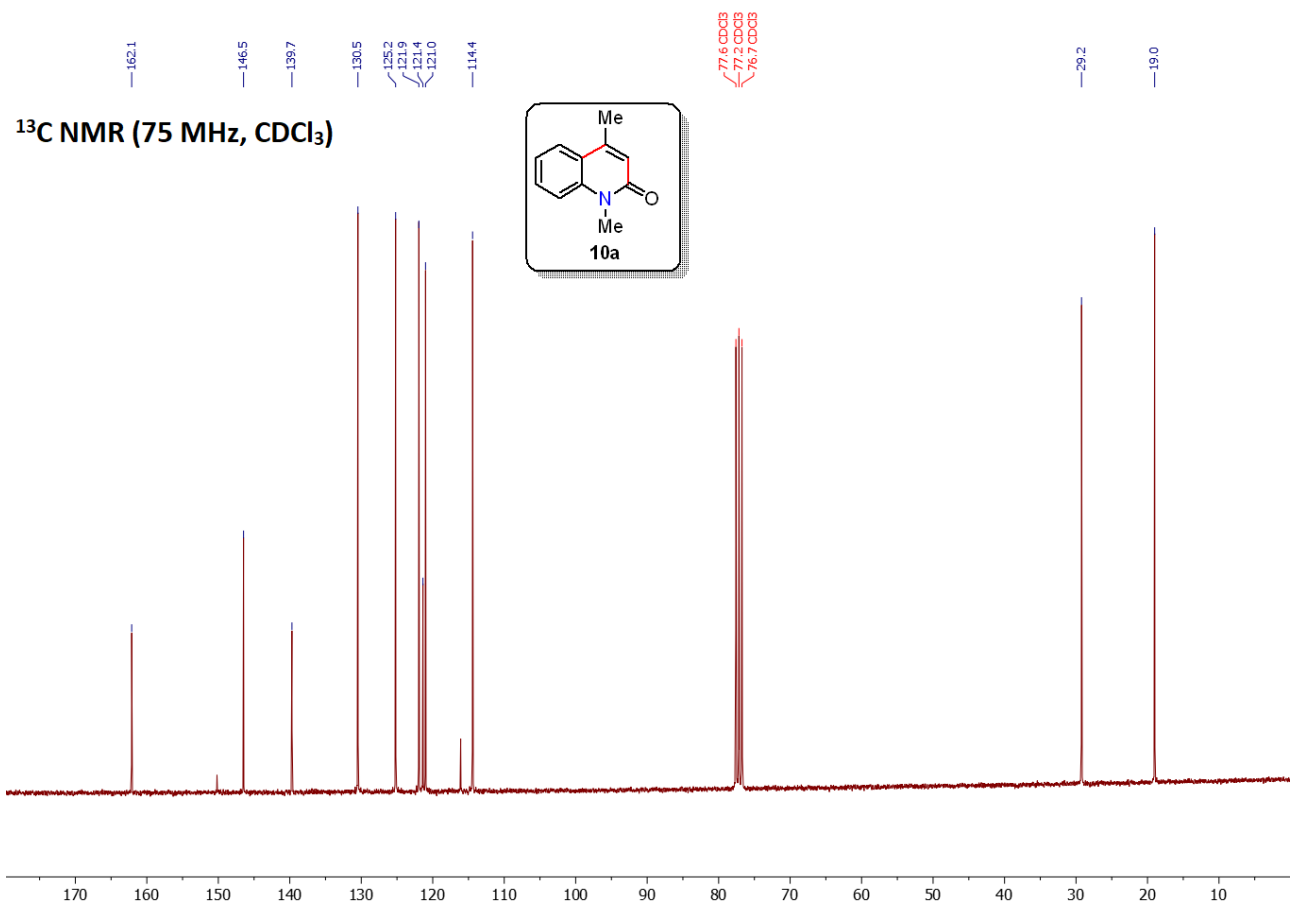

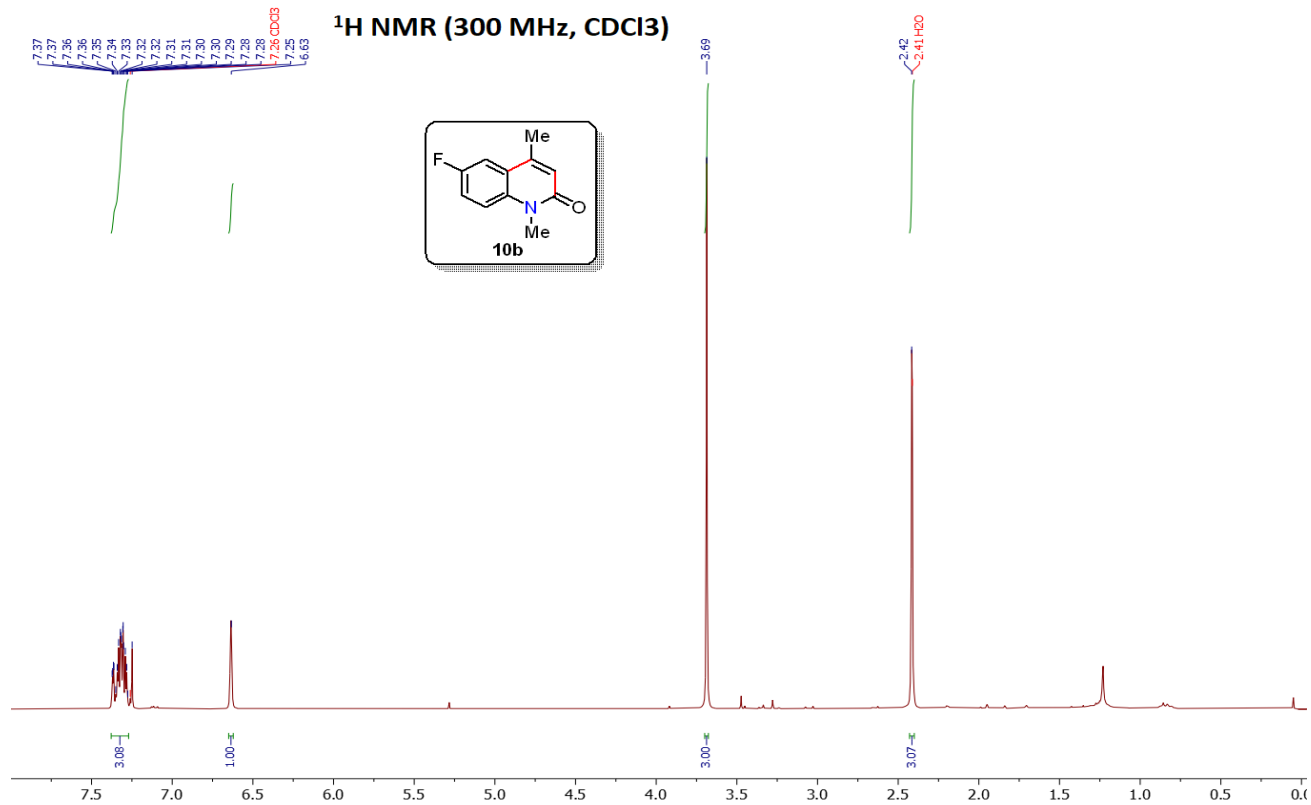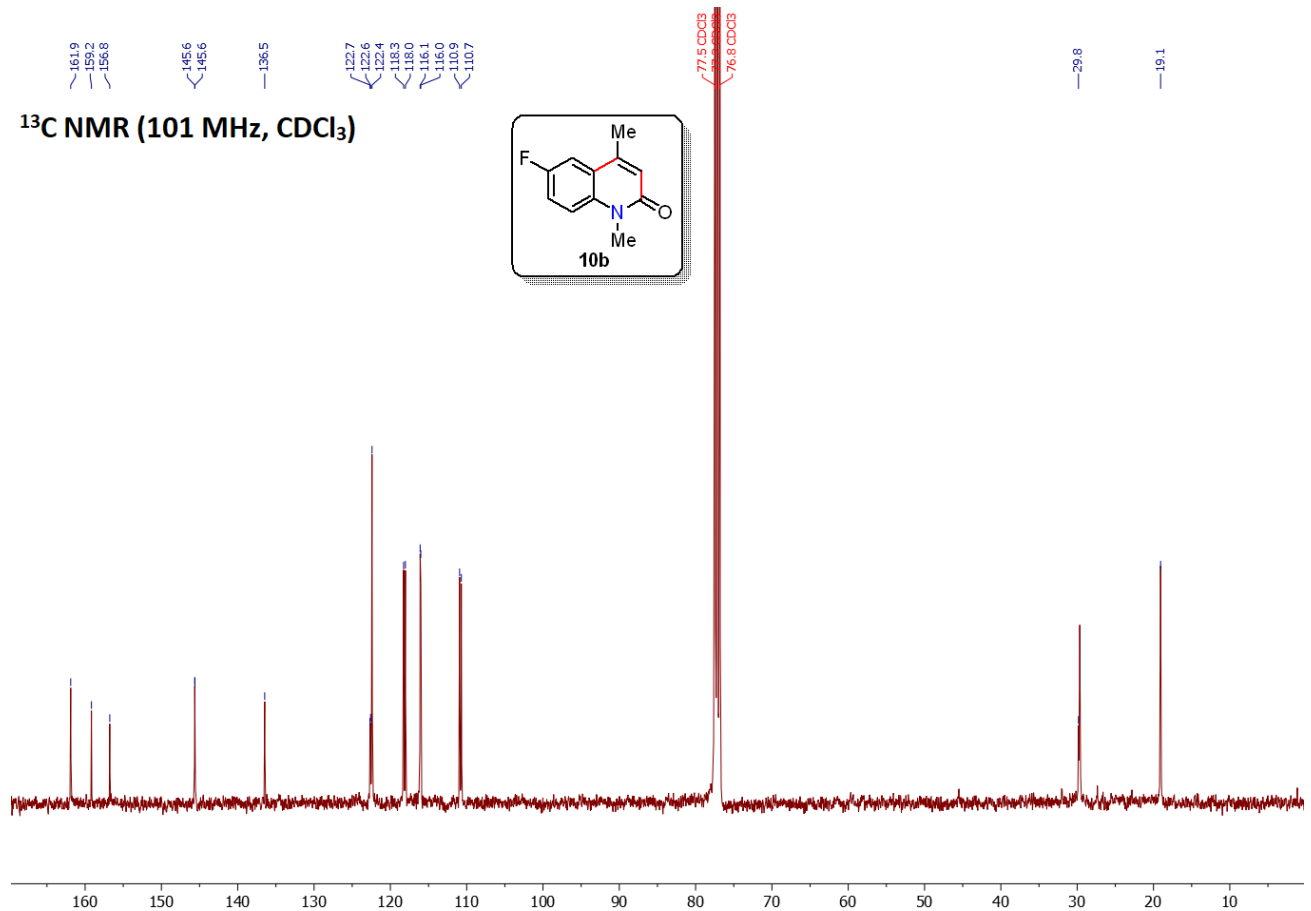

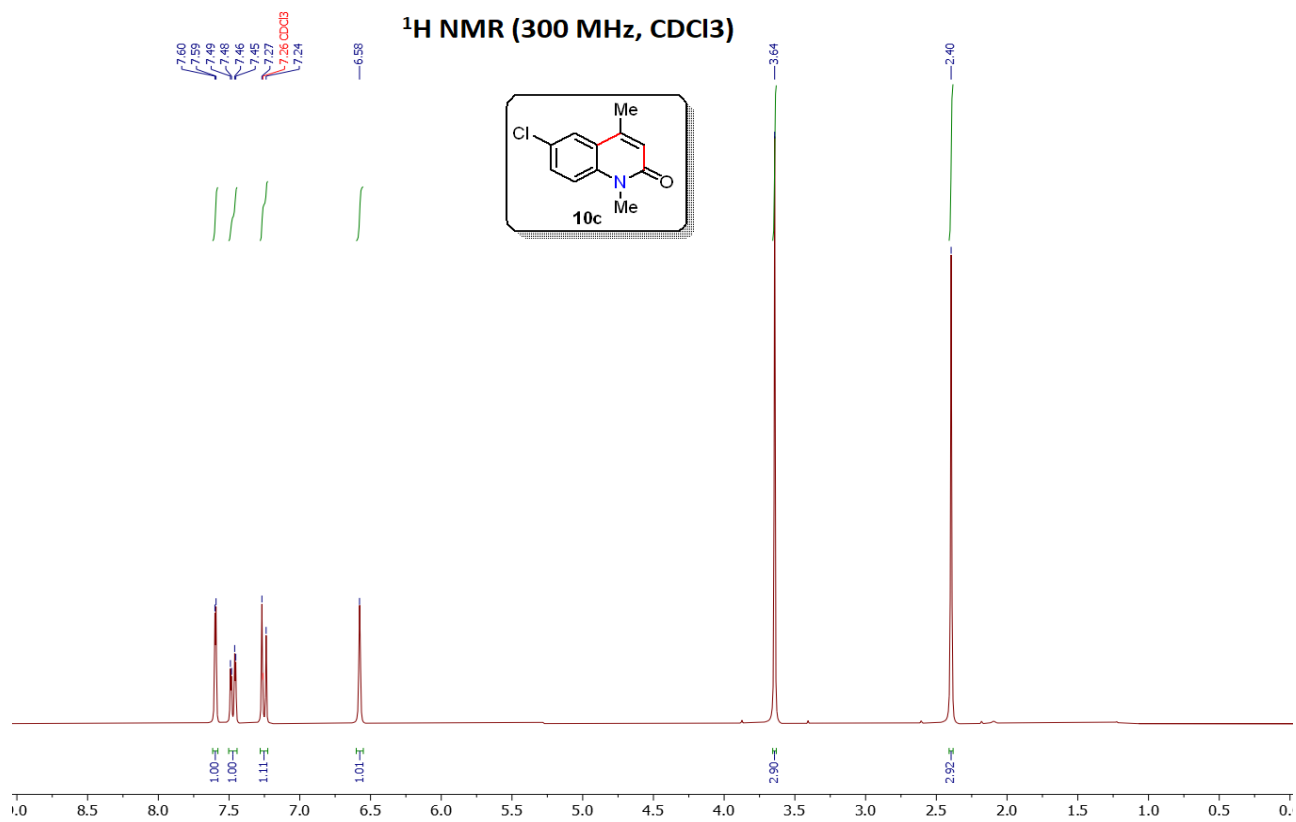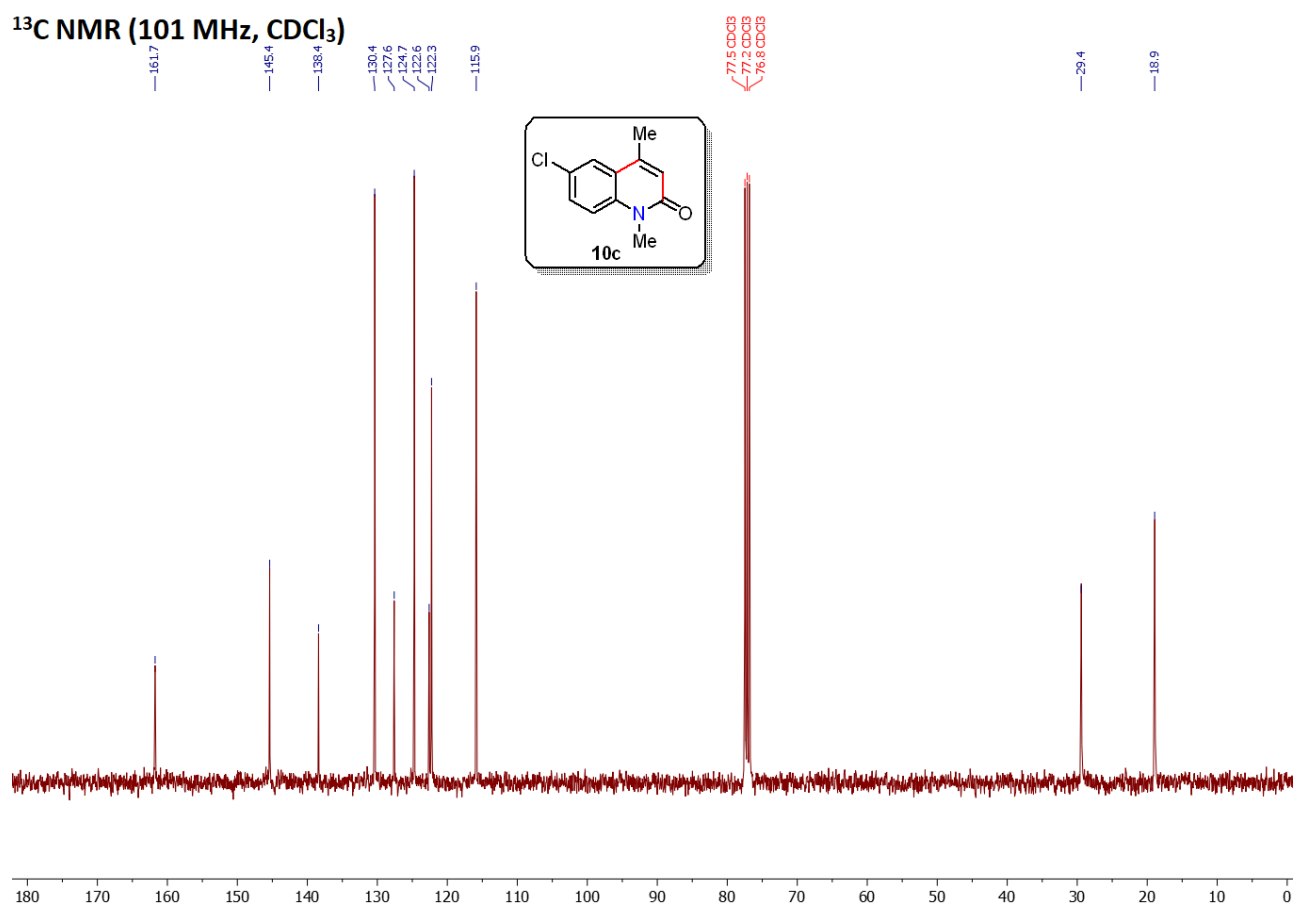

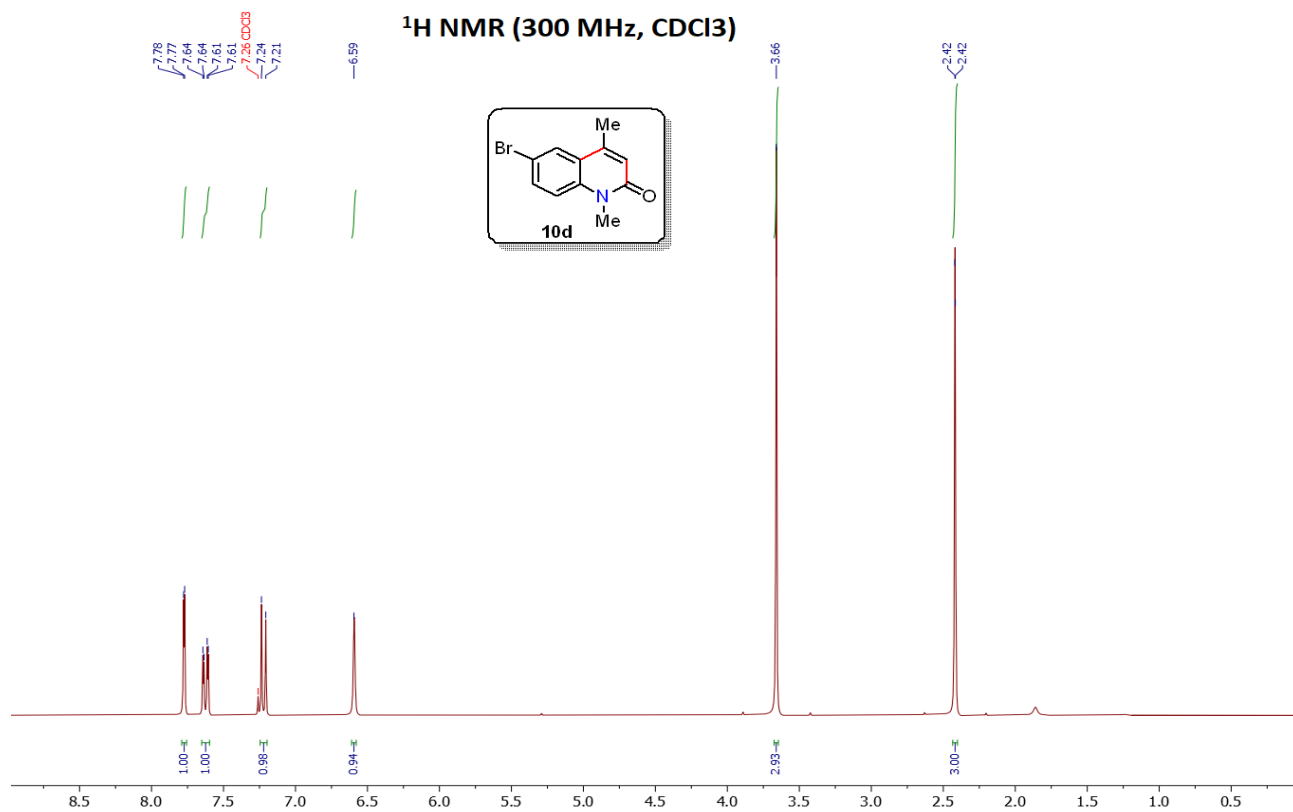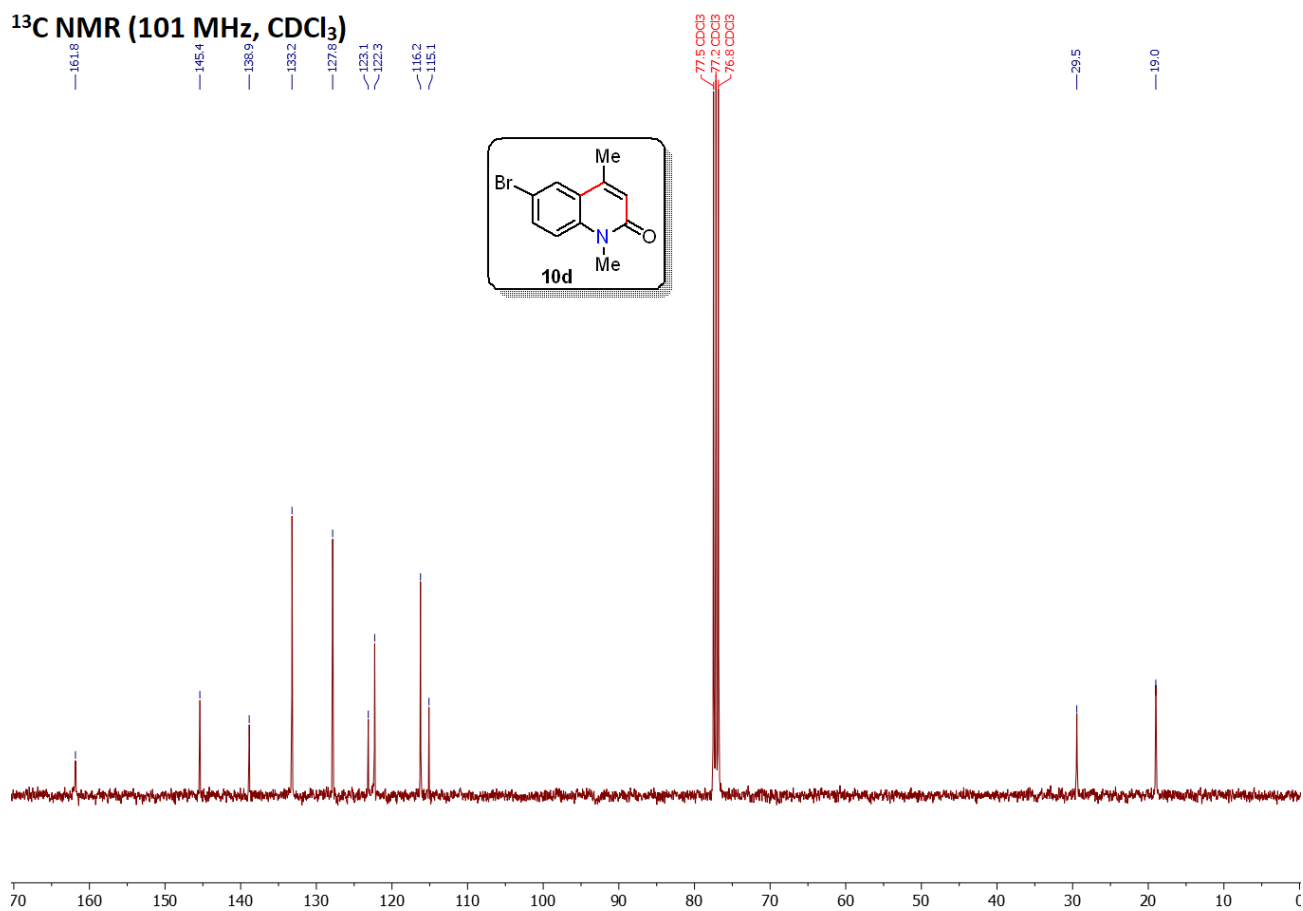

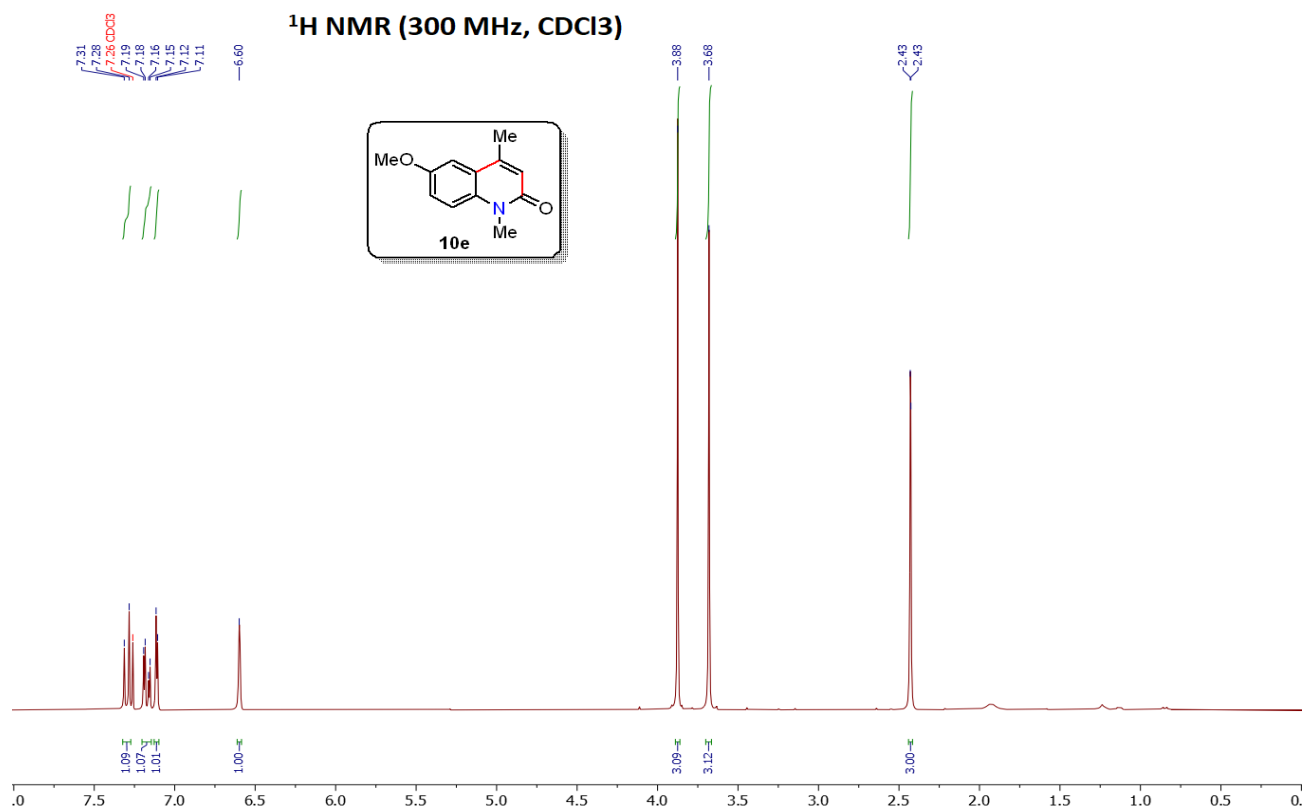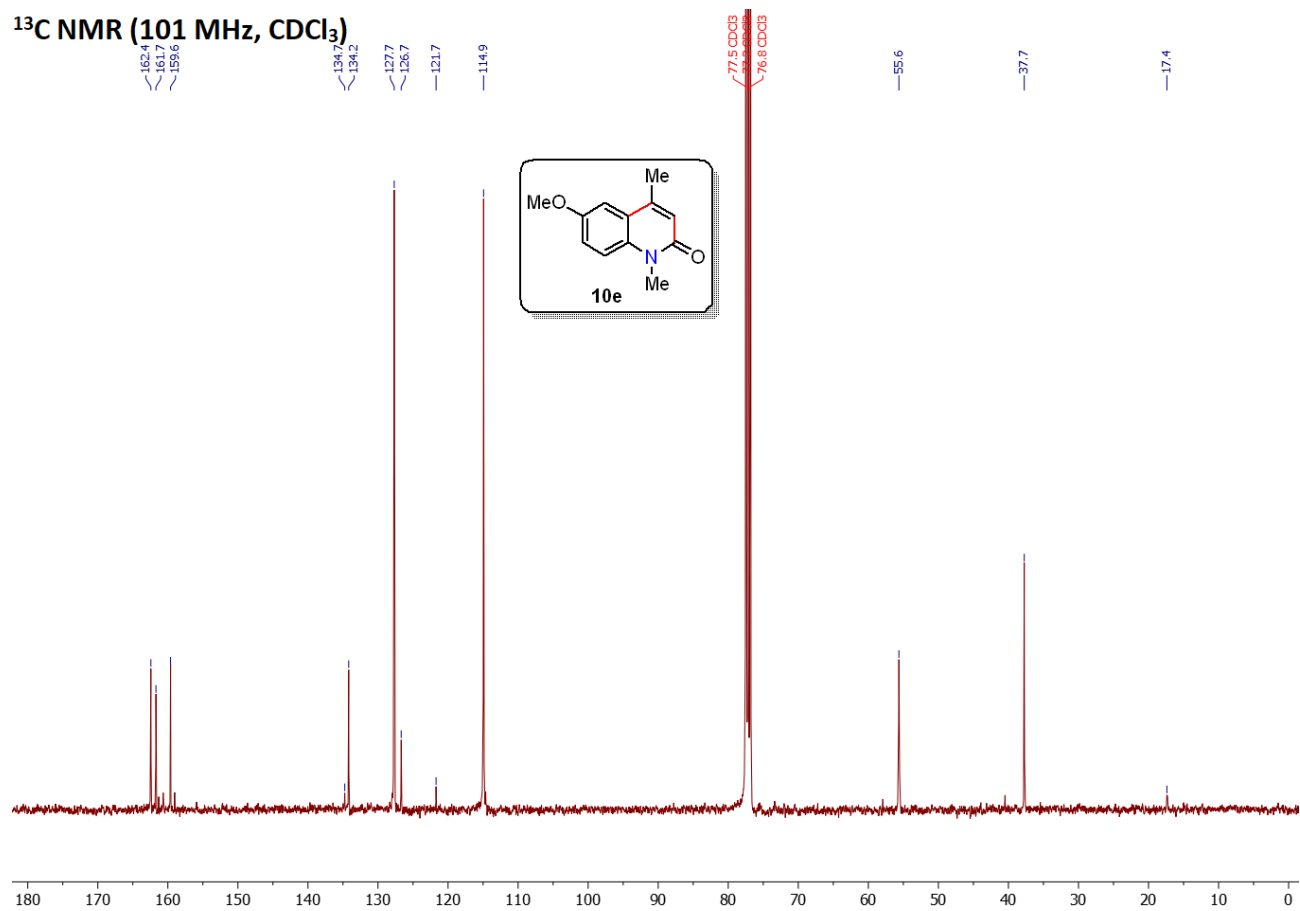

**<sup>1</sup>H NMR (300 MHz, DMSO-d<sub>6</sub>)**

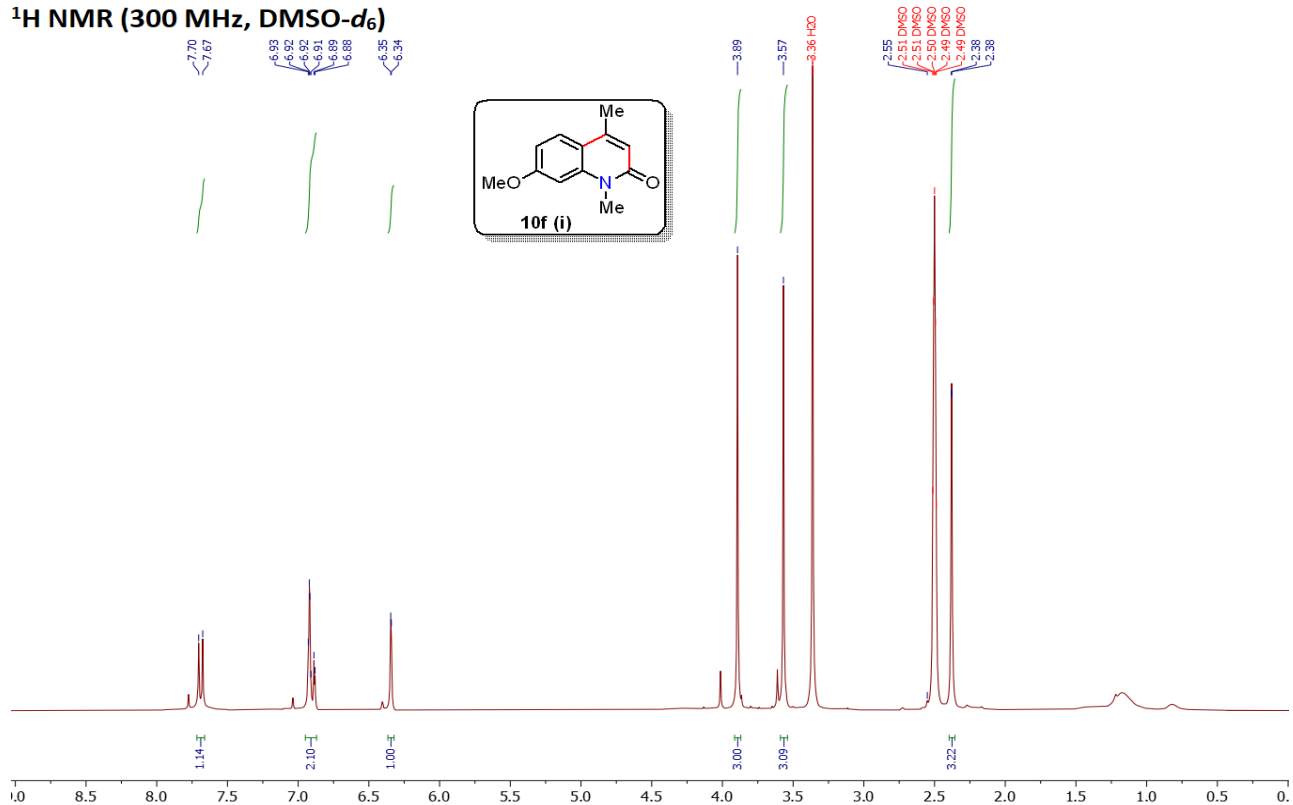

**<sup>13</sup>C NMR (151 MHz, DMSO-d<sub>6</sub>)**

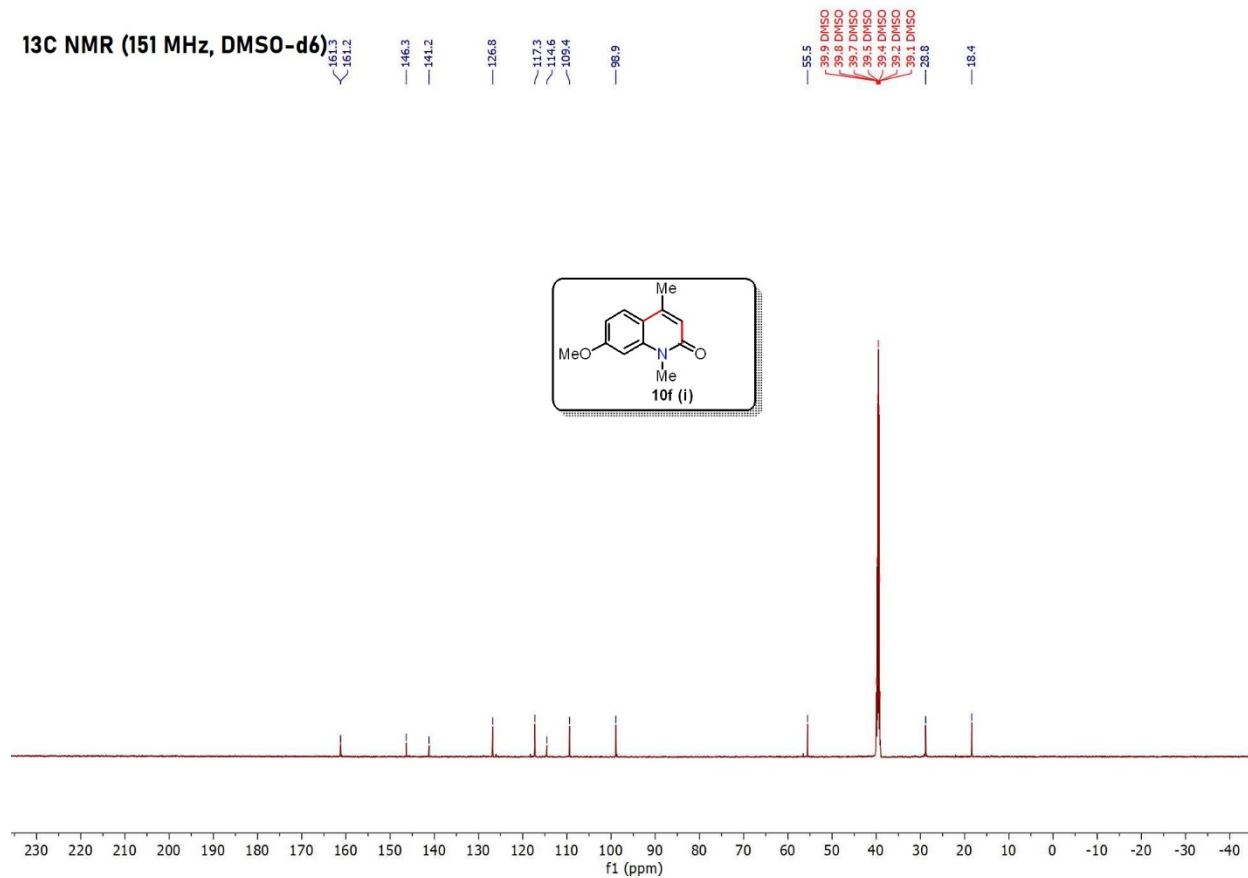

**<sup>1</sup>H NMR (300 MHz, DMSO-d<sub>6</sub>)**

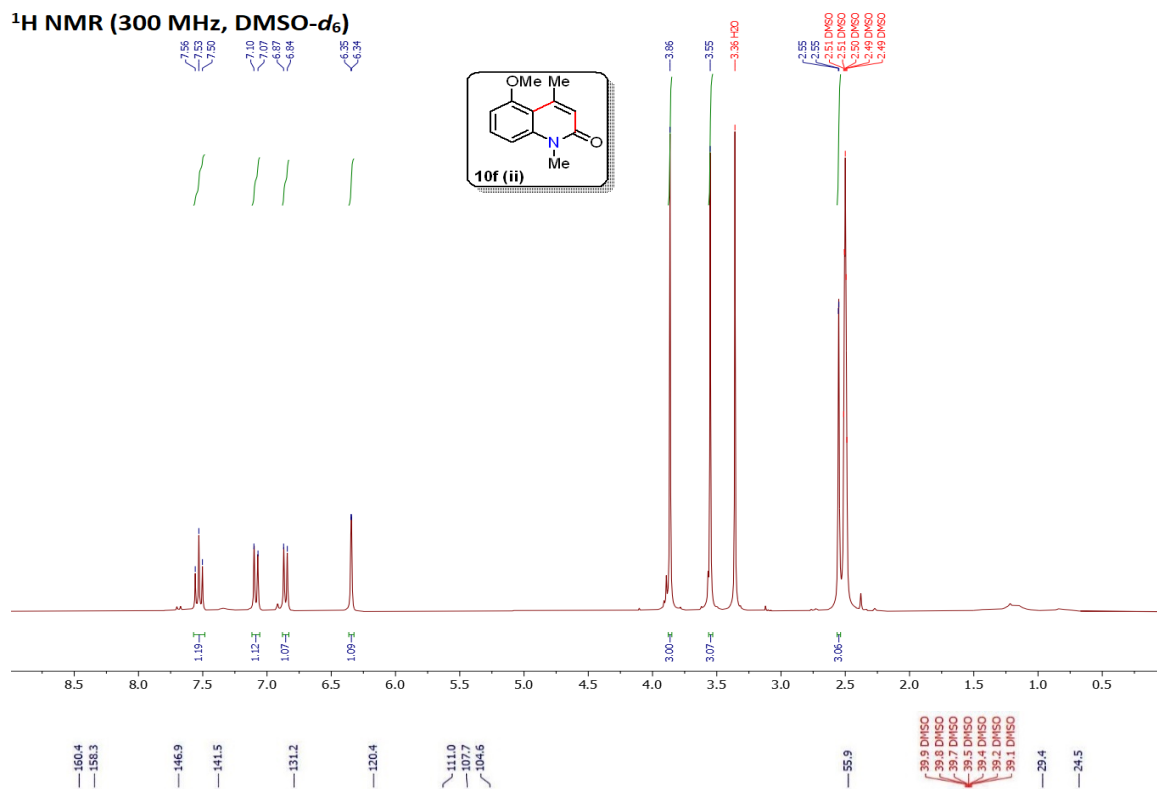

**<sup>13</sup>C NMR (151 MHz, DMSO-d<sub>6</sub>)**

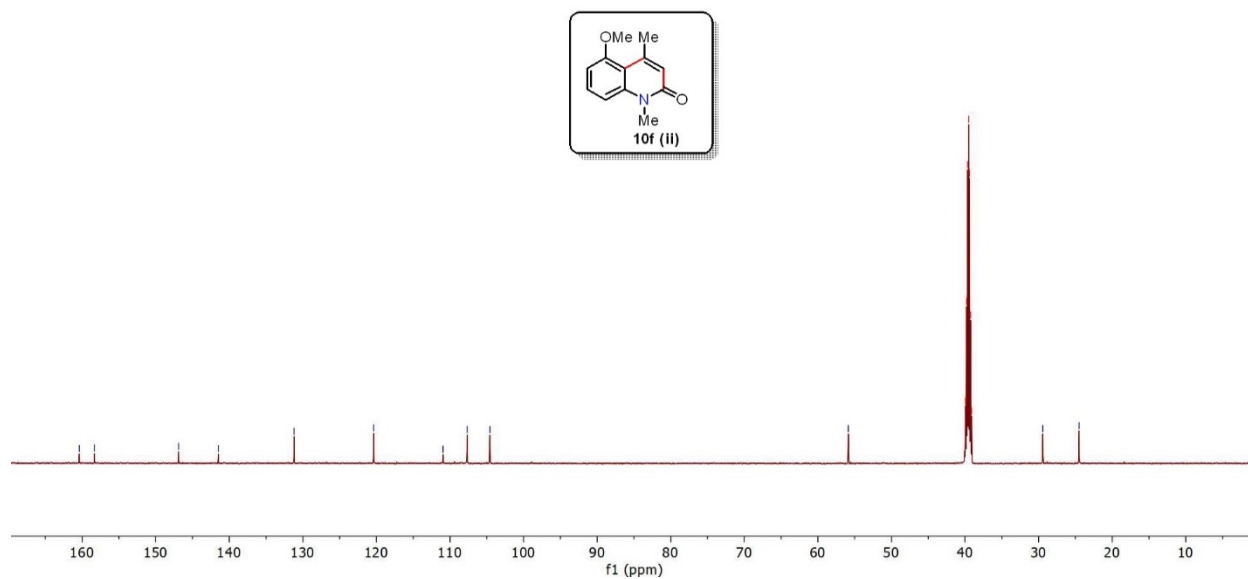



<sup>1</sup>H NMR (300 MHz, CDCl<sub>3</sub>)

8.26  
8.26  
8.12  
8.11  
8.09  
8.08

7.38  
7.35  
7.26 CDCl<sub>3</sub>

6.60

3.67

2.63  
2.48

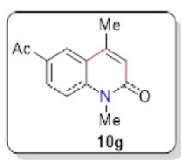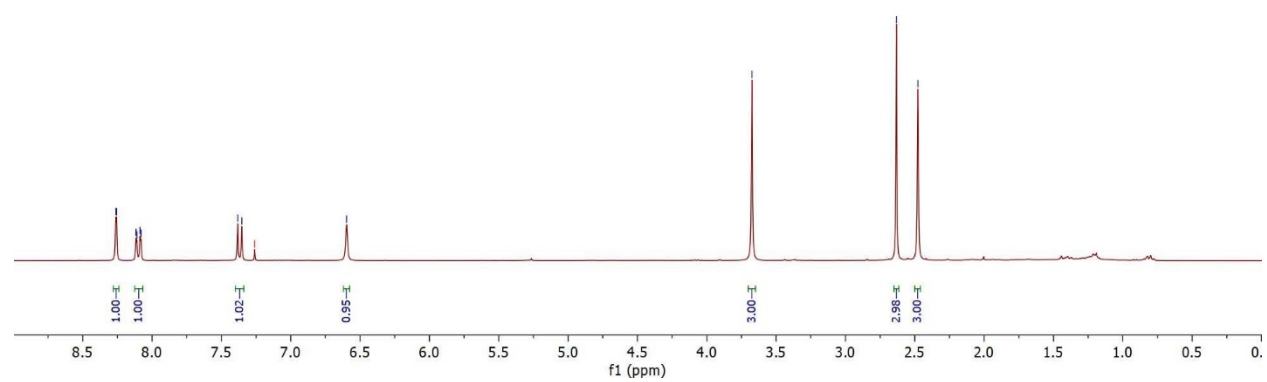

<sup>13</sup>C NMR (101 MHz, CDCl<sub>3</sub>)

196.67

162.11

146.96

142.90

130.79

130.31

128.97

121.78

121.04

114.53

77.48 CDCl<sub>3</sub>  
77.16 CDCl<sub>3</sub>  
76.84 CDCl<sub>3</sub>

29.59

26.57

19.04

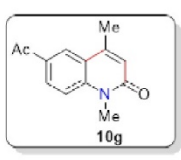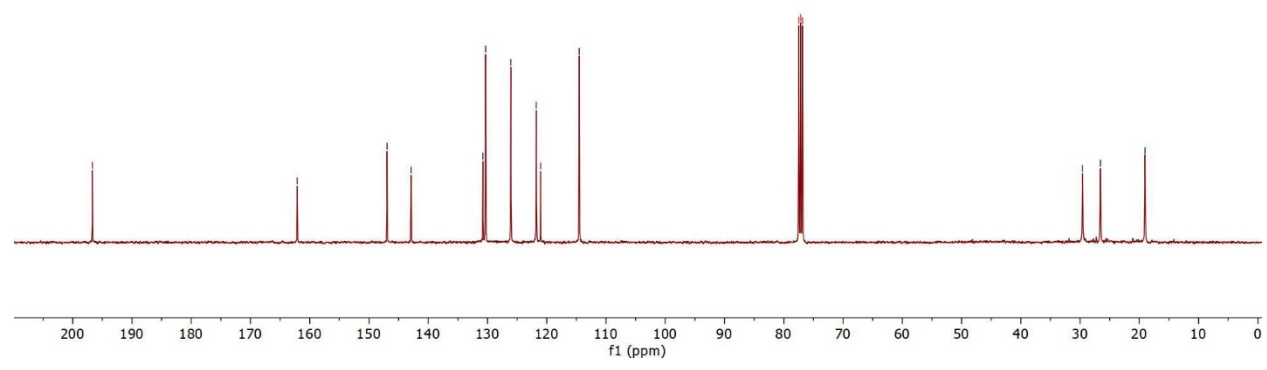

<sup>1</sup>H NMR (300 MHz, CDCl<sub>3</sub>)

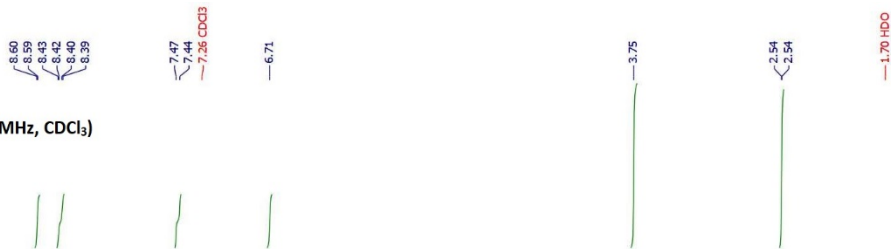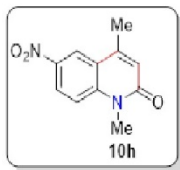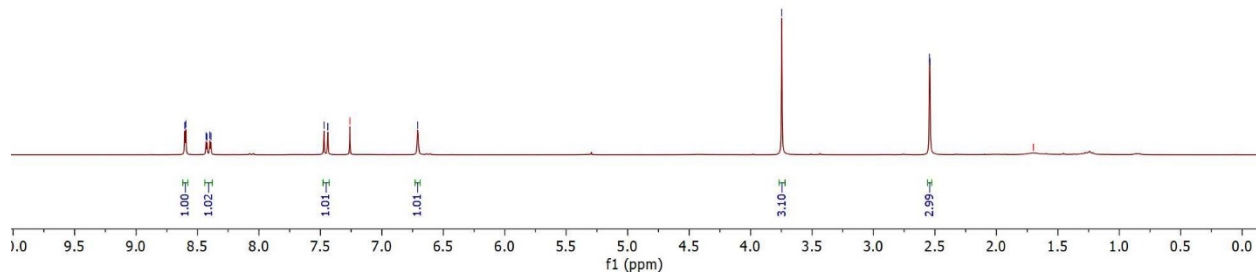

<sup>13</sup>C NMR (101 MHz, CDCl<sub>3</sub>)

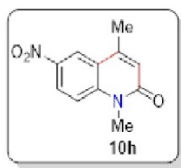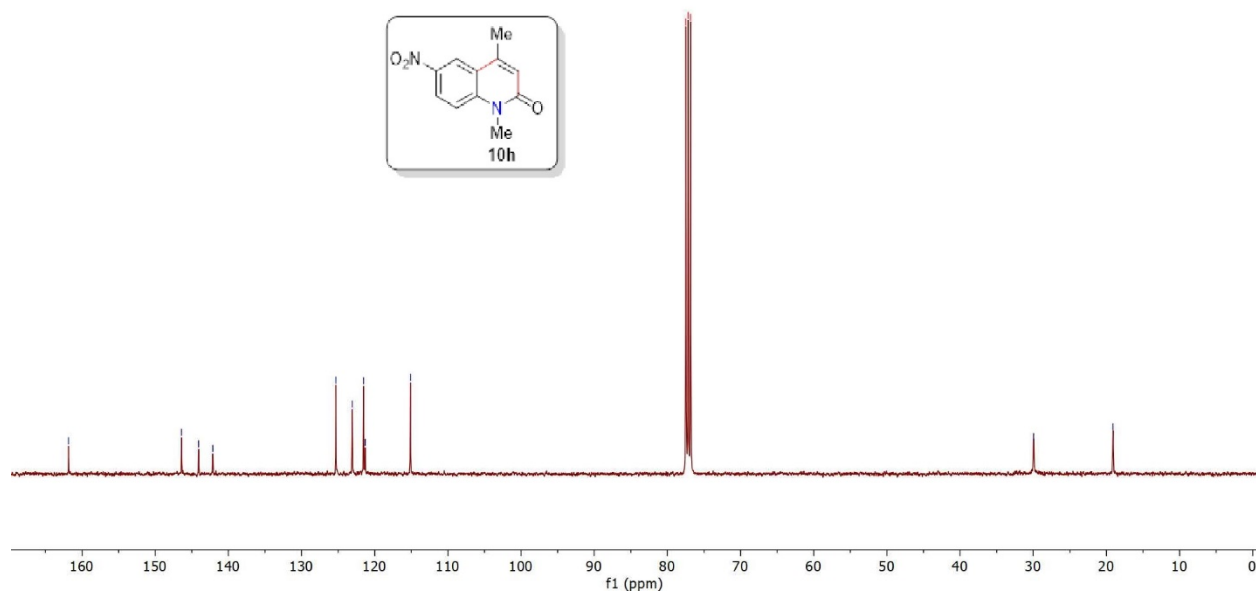

<sup>1</sup>H NMR (300 MHz, CDCl<sub>3</sub>)

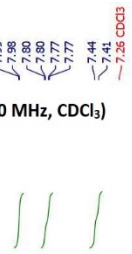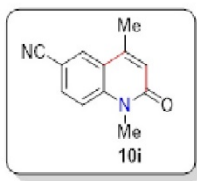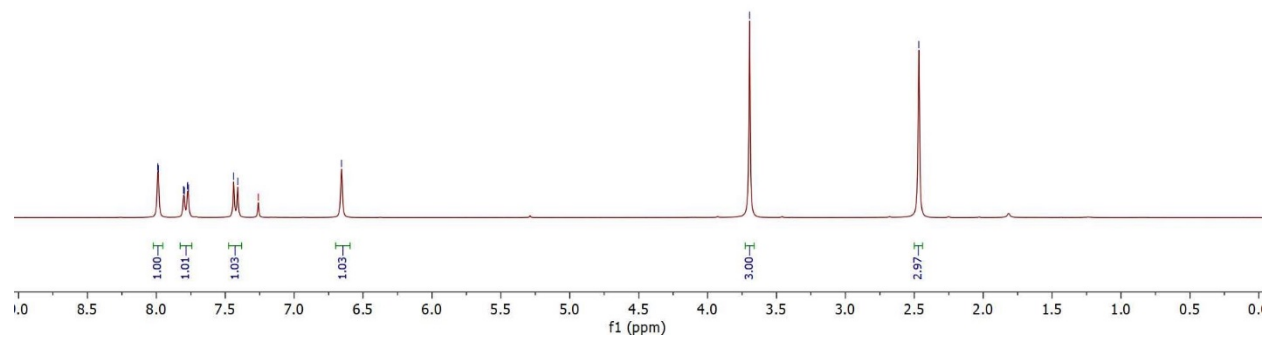

<sup>13</sup>C NMR (101 MHz, CDCl<sub>3</sub>)

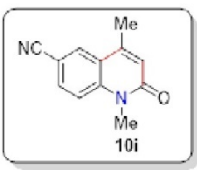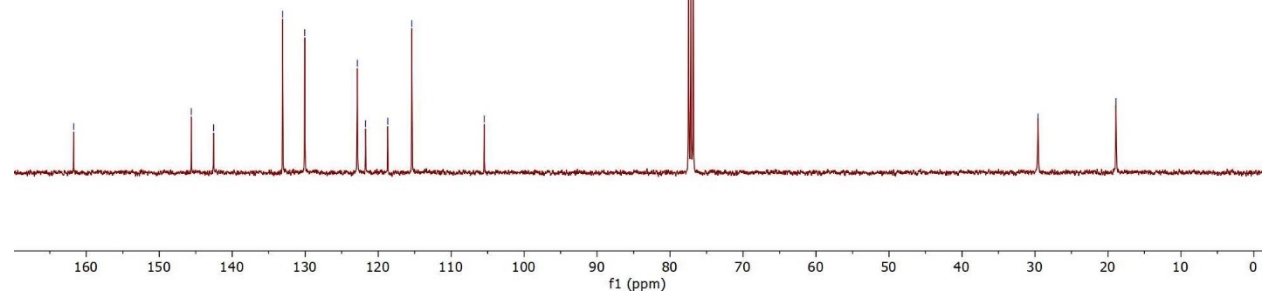

<sup>19</sup>F NMR (377 MHz, CDCl<sub>3</sub>)

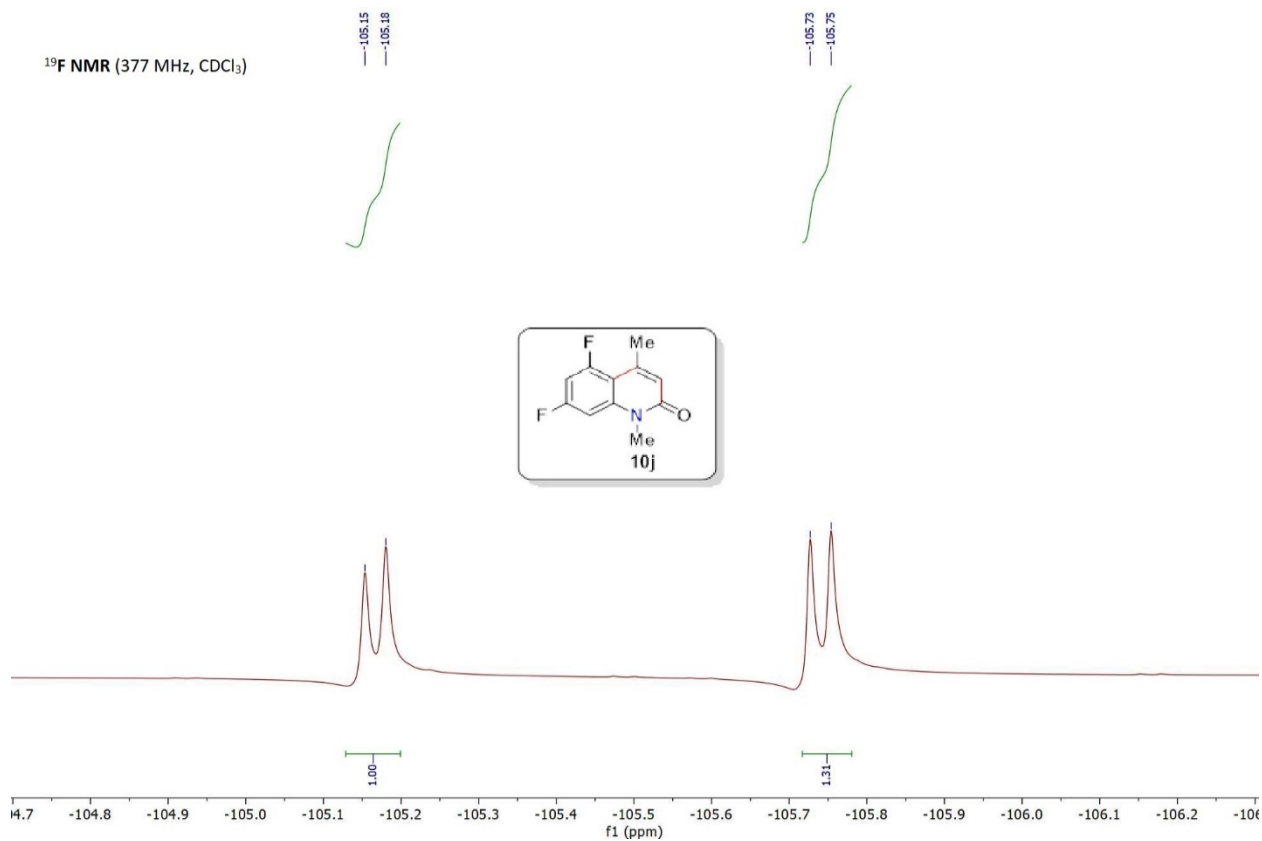

<sup>1</sup>H NMR (300 MHz, CDCl<sub>3</sub>)

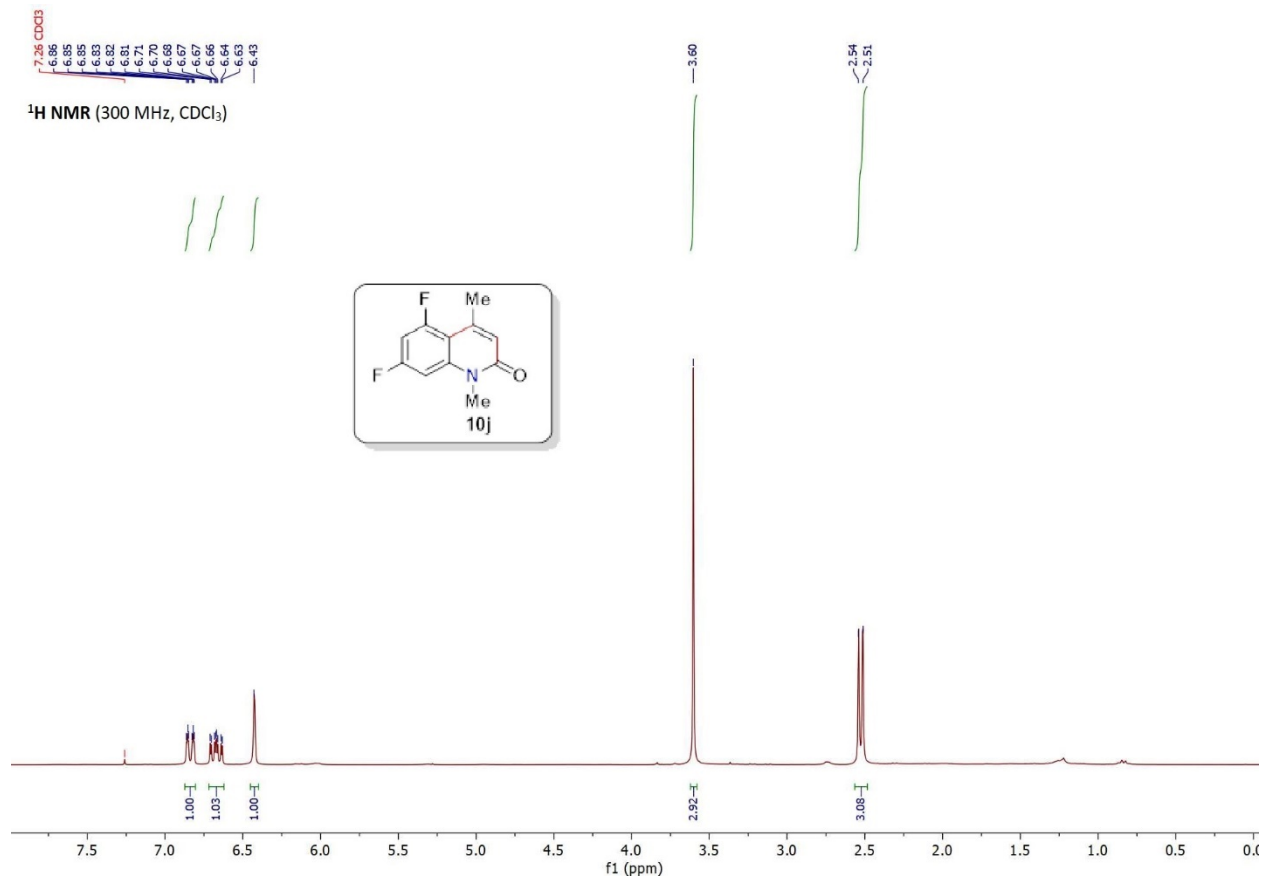

<sup>13</sup>C NMR (75 MHz, CDCl<sub>3</sub>)

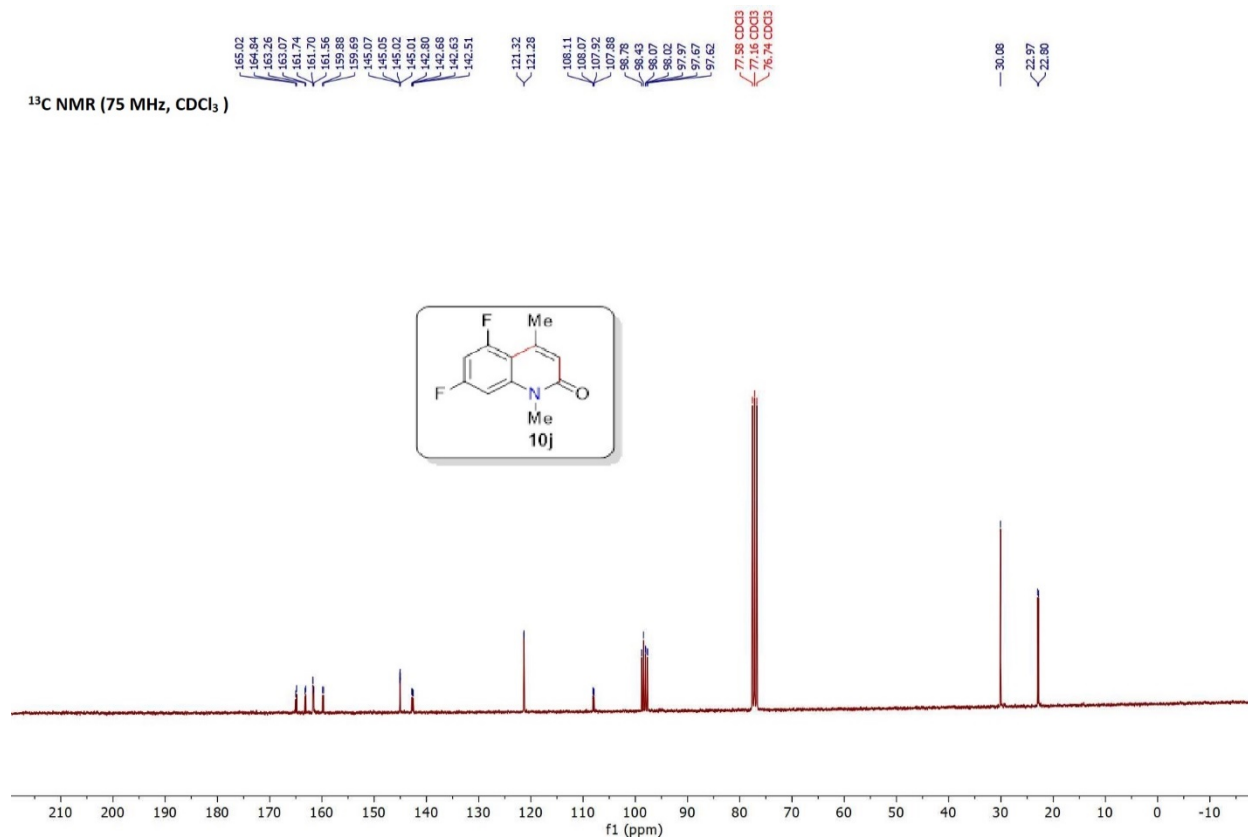

<sup>1</sup>H NMR (300 MHz, CDCl<sub>3</sub>)

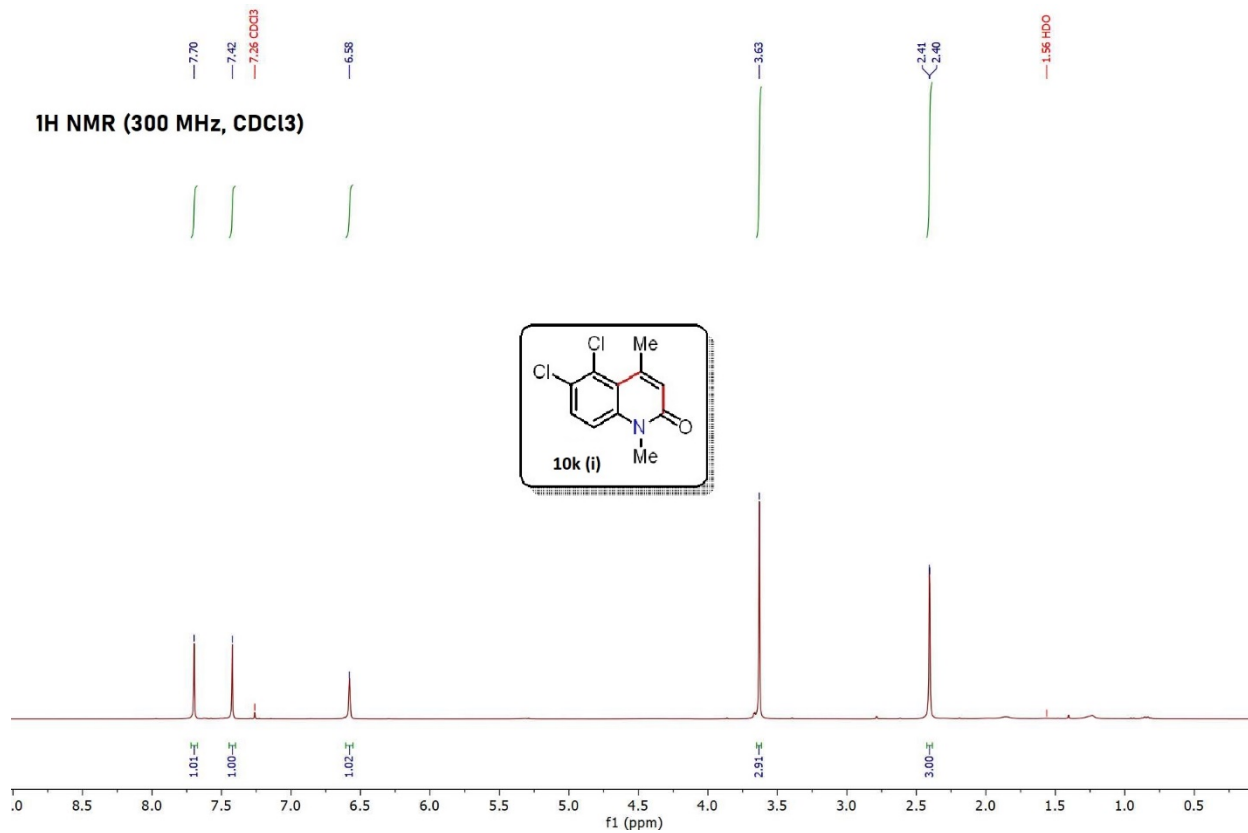

**<sup>13</sup>C NMR (151 MHz, CDCl<sub>3</sub>)**

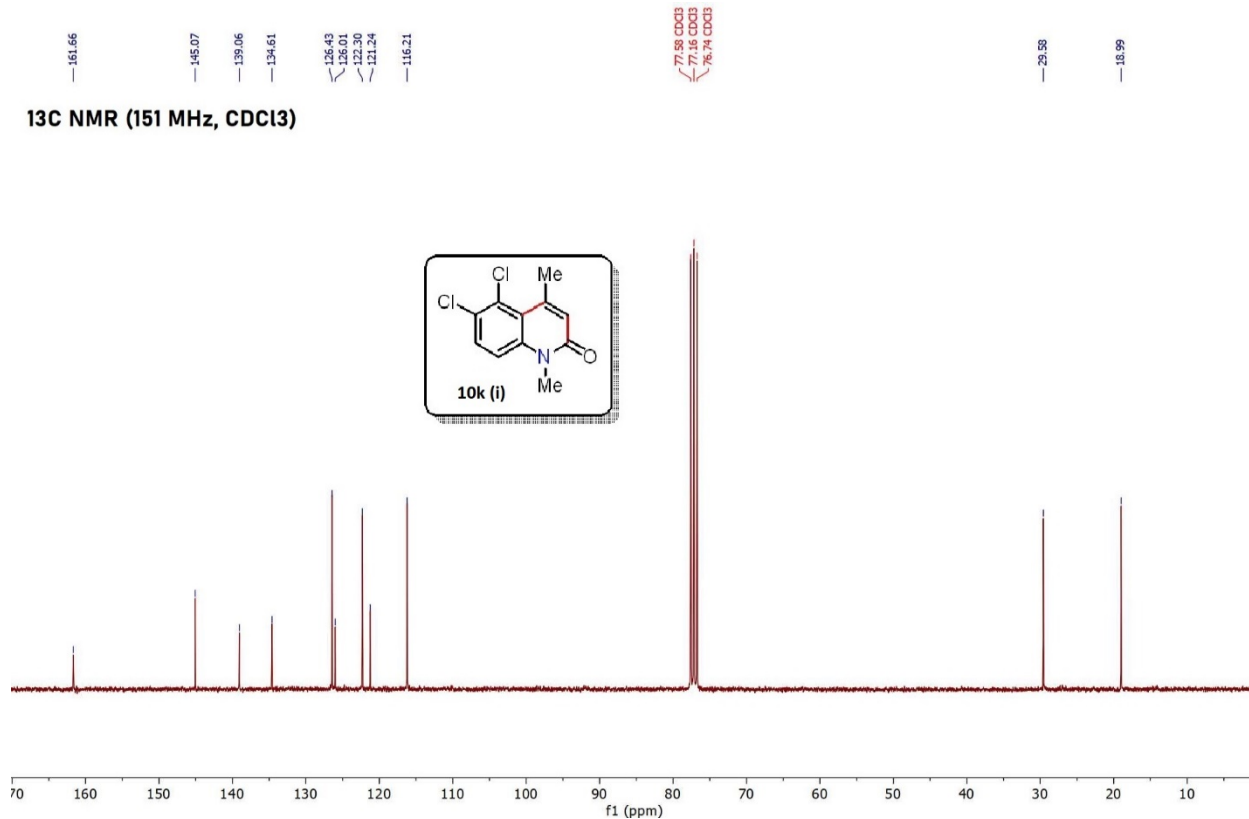

FEB 22.323.fid  
CMM0932/2X

**<sup>1</sup>H NMR (300 MHz, CDCl<sub>3</sub>)**

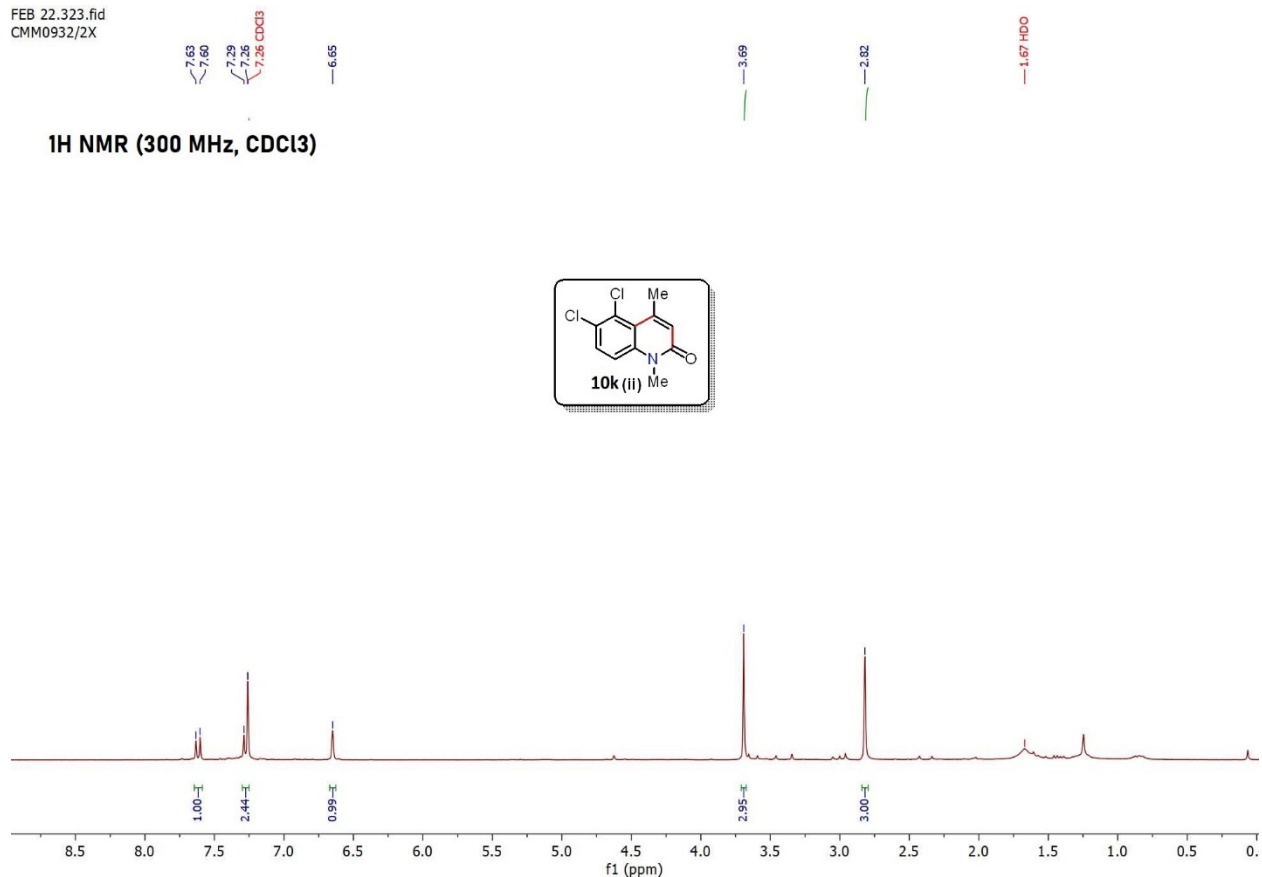

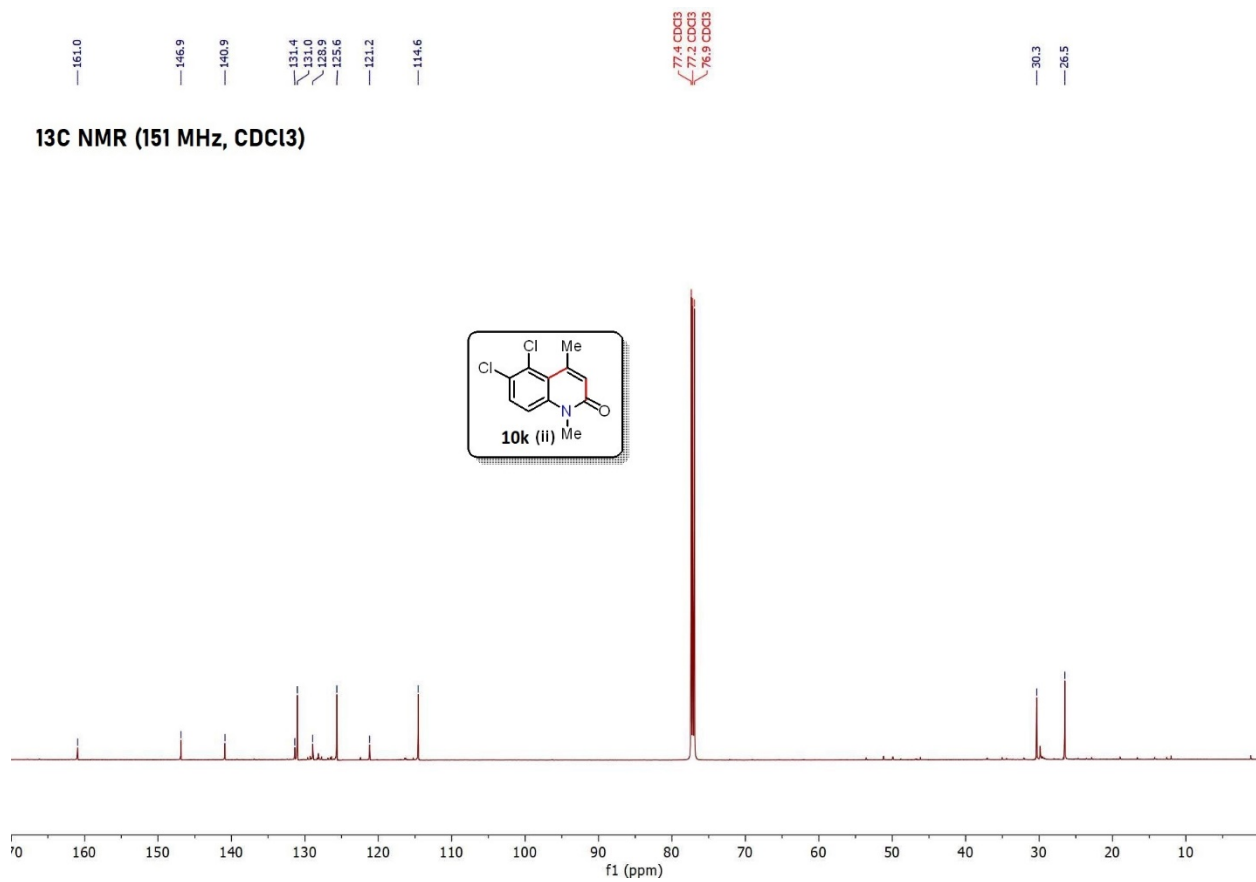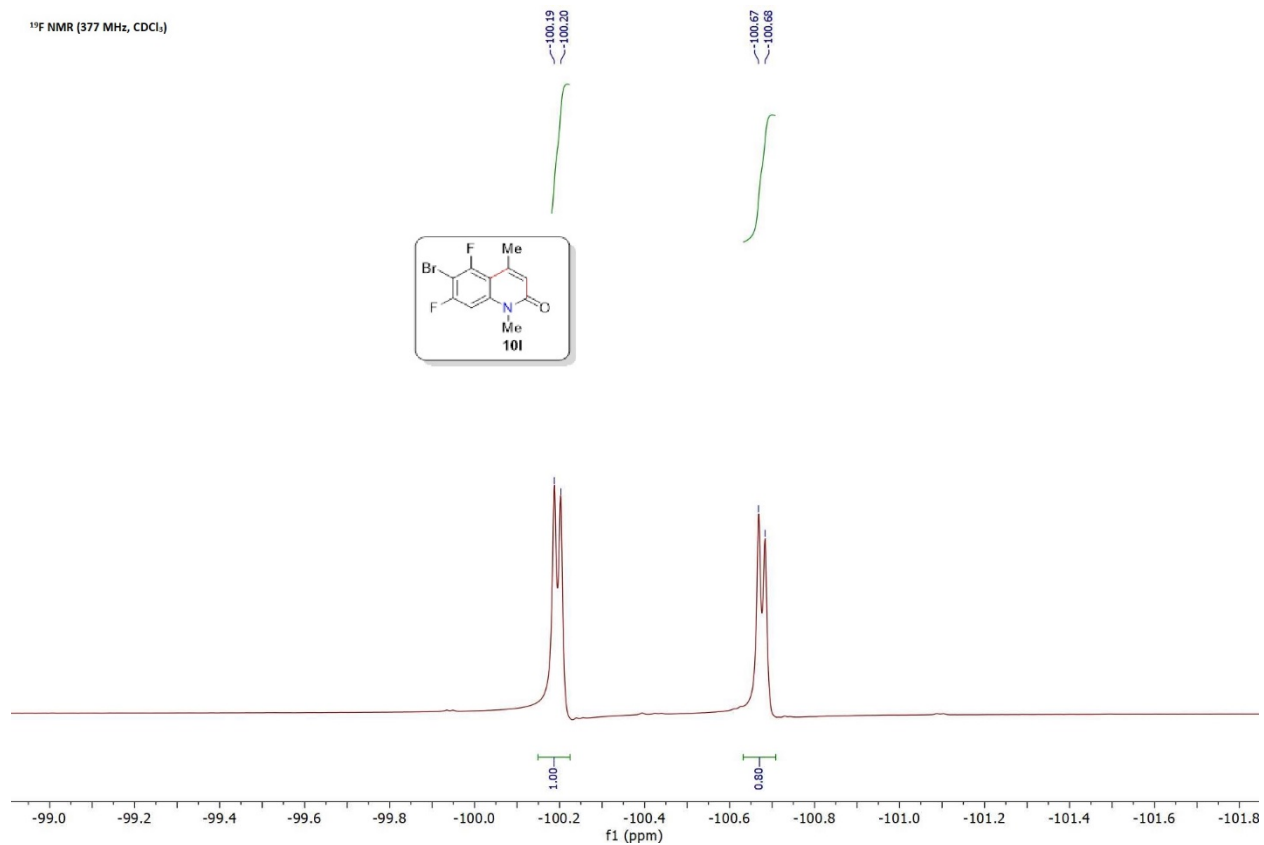

<sup>1</sup>H NMR (300 MHz, CDCl<sub>3</sub>)

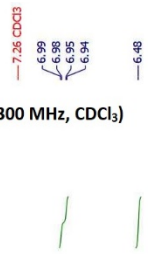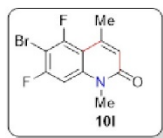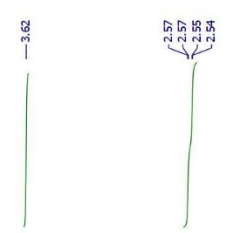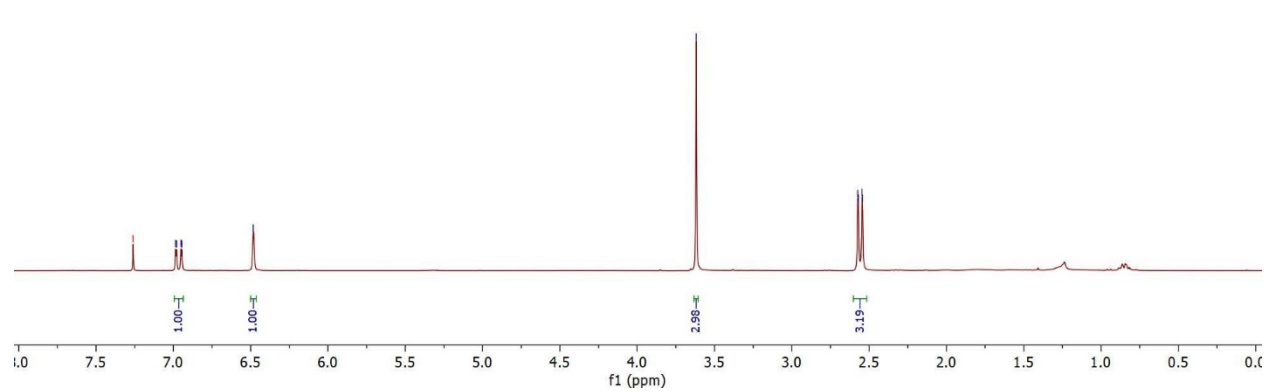

<sup>13</sup>C NMR (101 MHz, CDCl<sub>3</sub>)

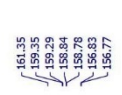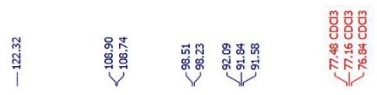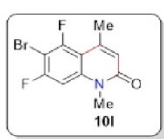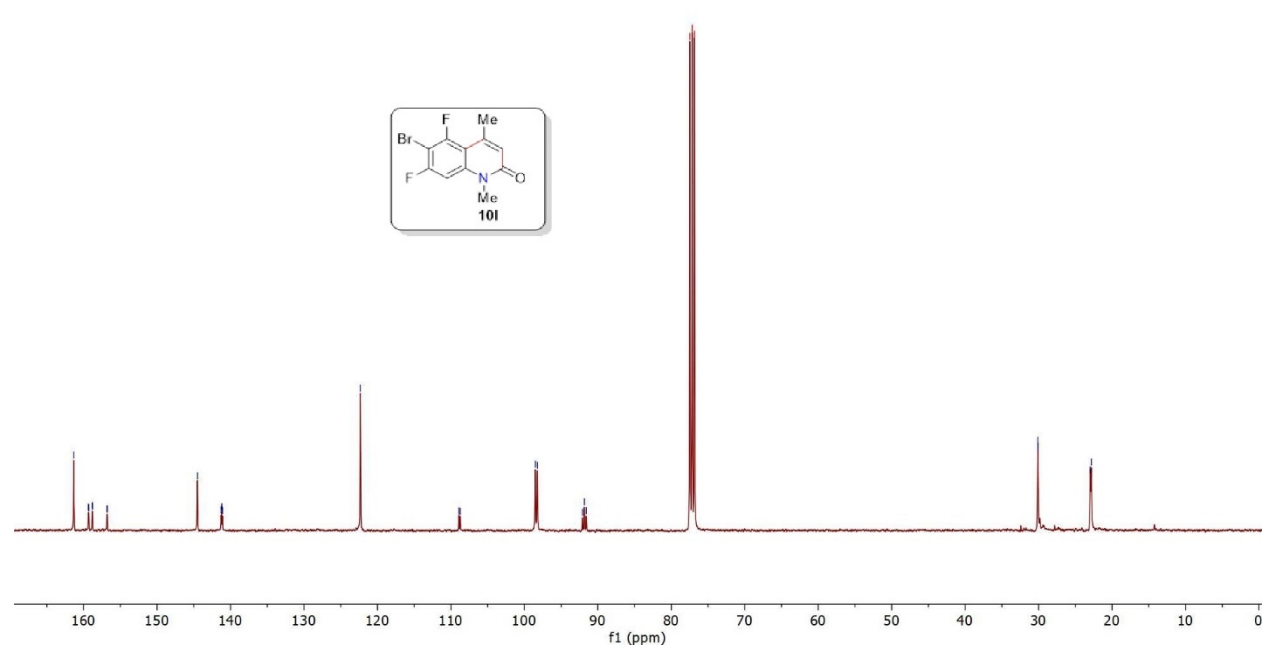



<sup>19</sup>F NMR (377 MHz, CDCl<sub>3</sub>)

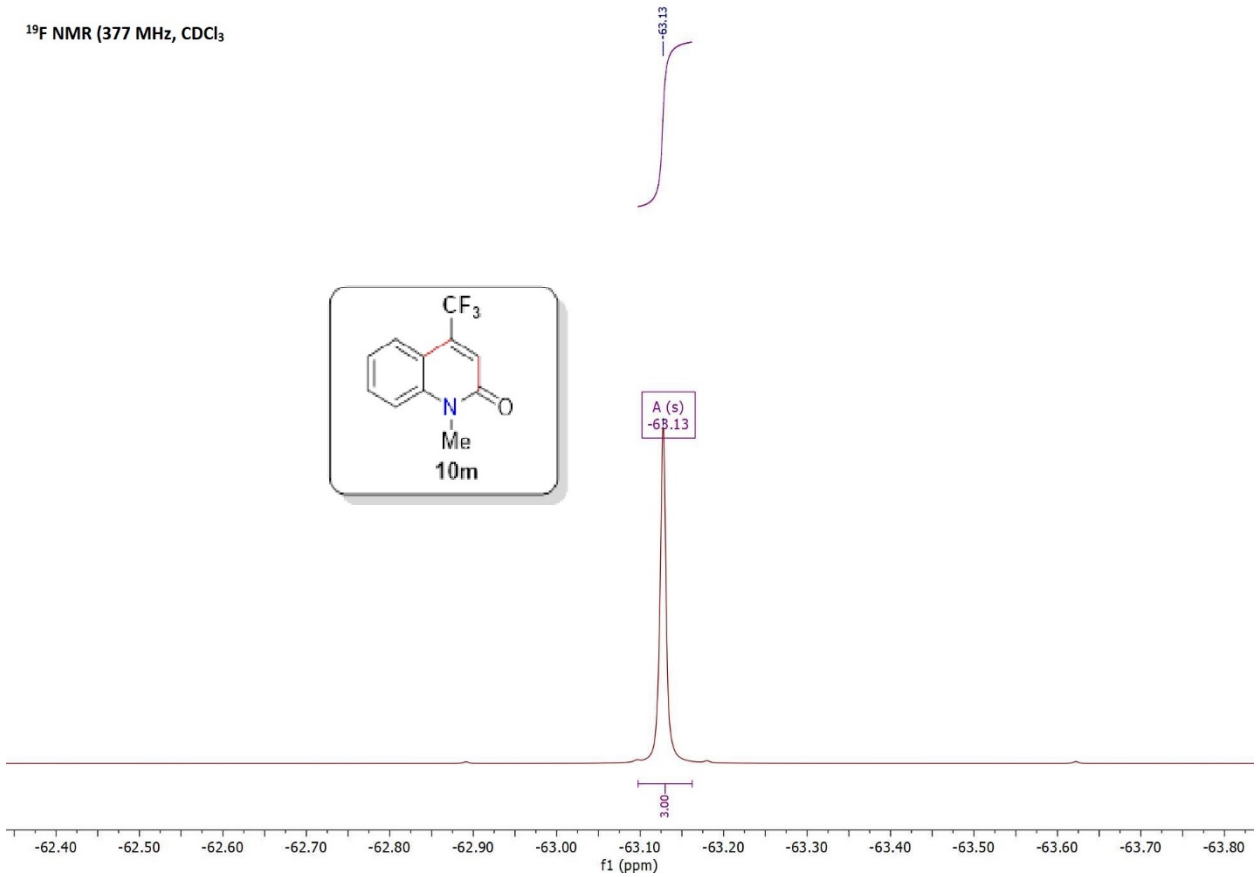

<sup>1</sup>H NMR (300 MHz, CDCl<sub>3</sub>)

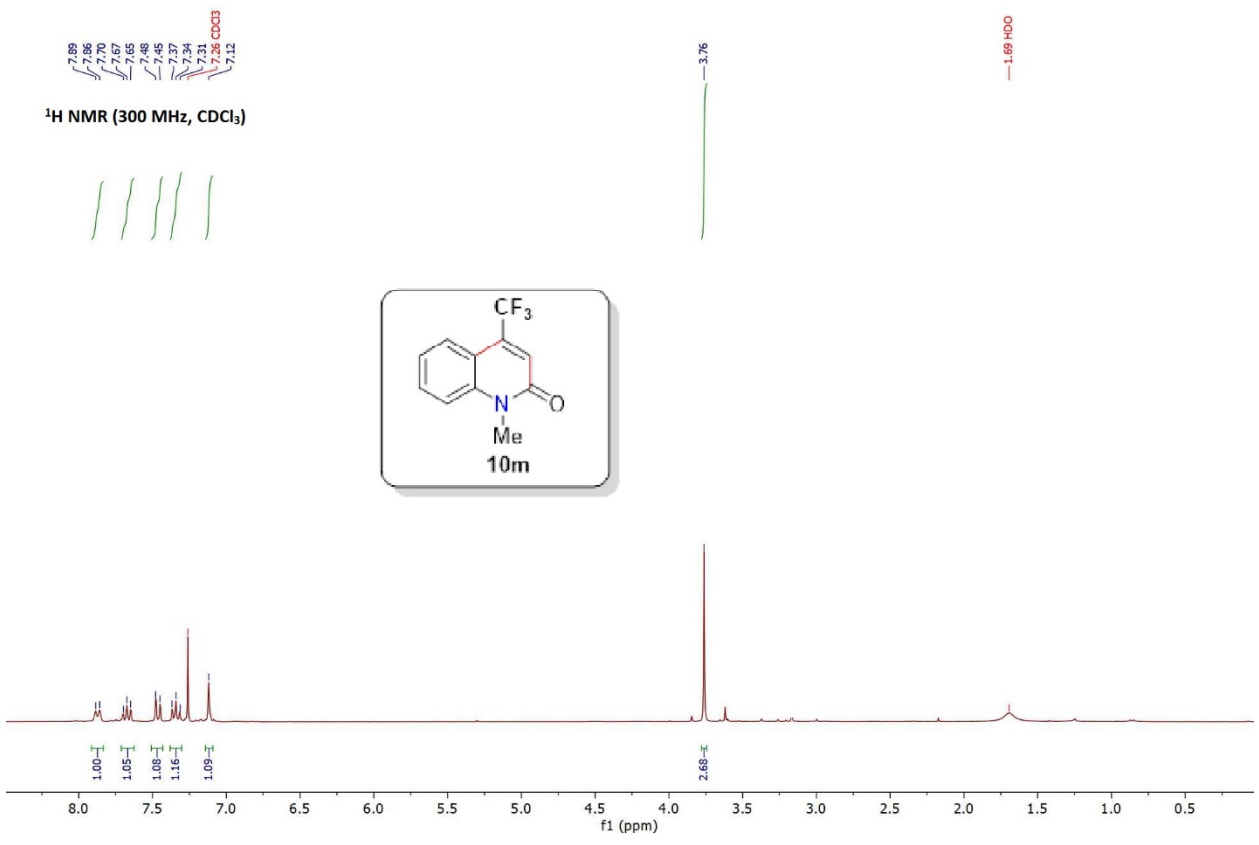

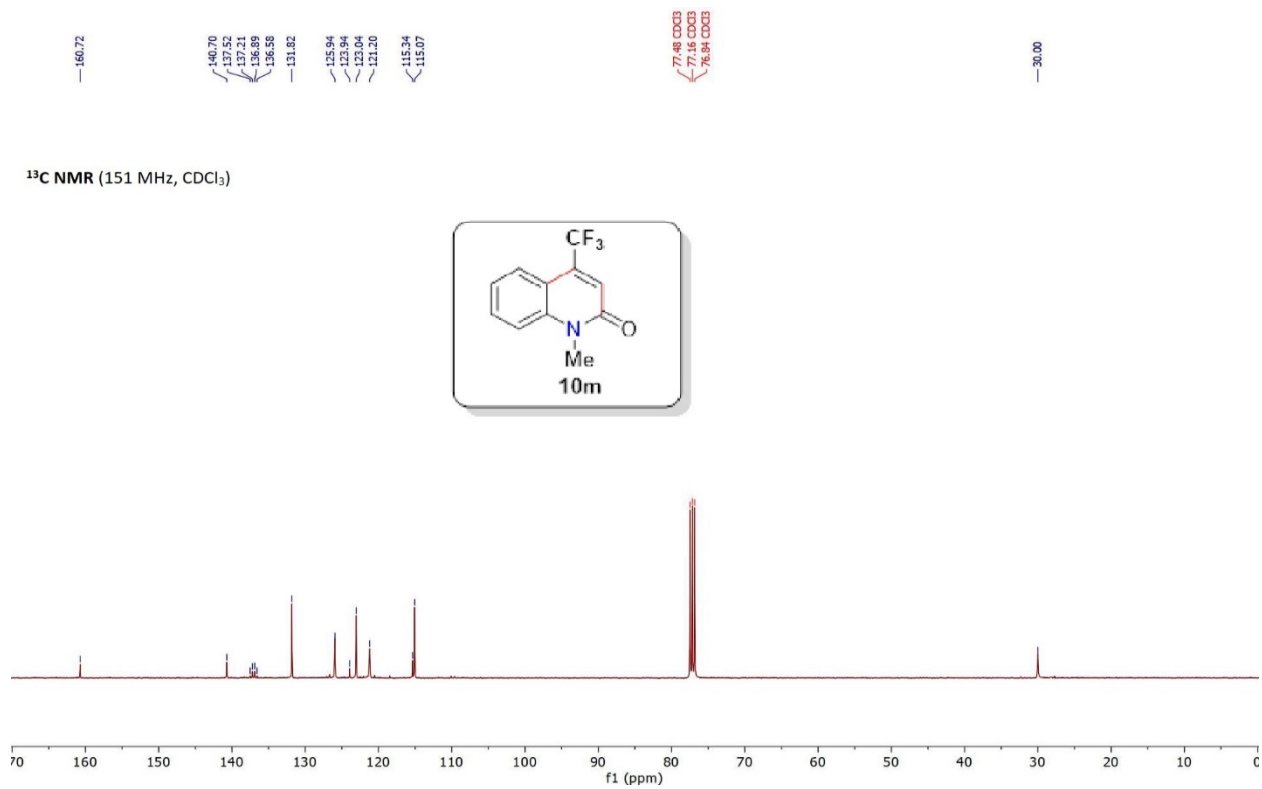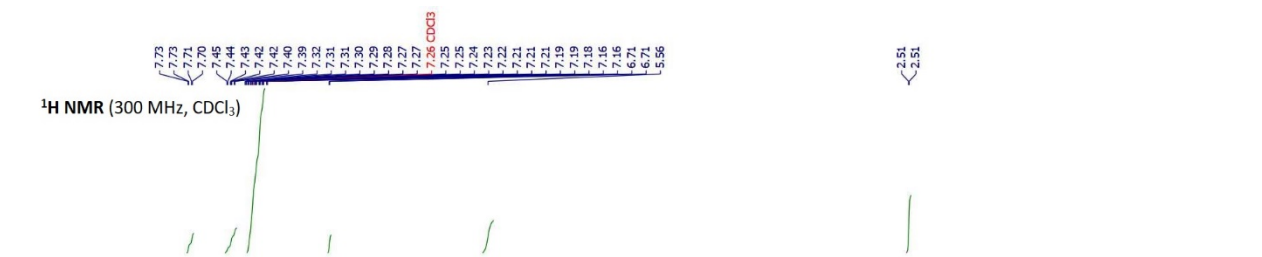

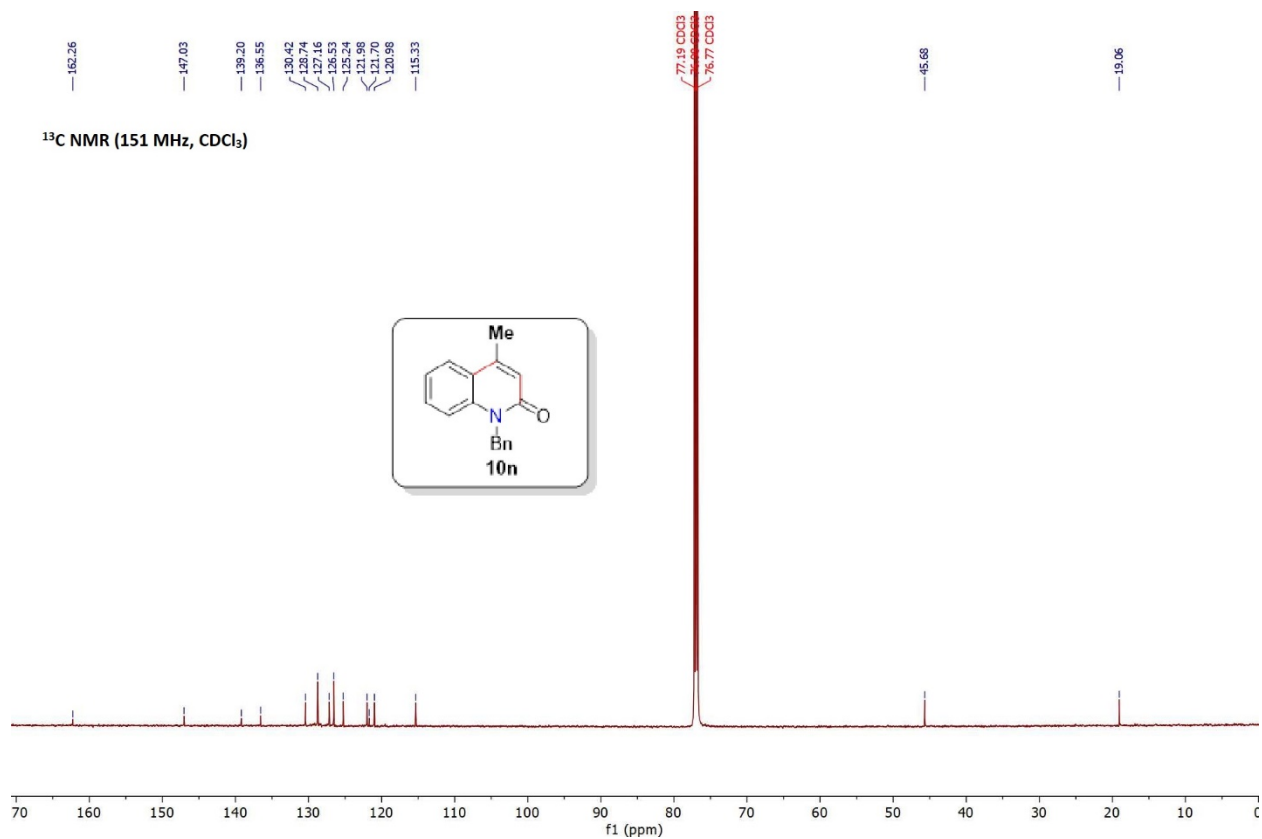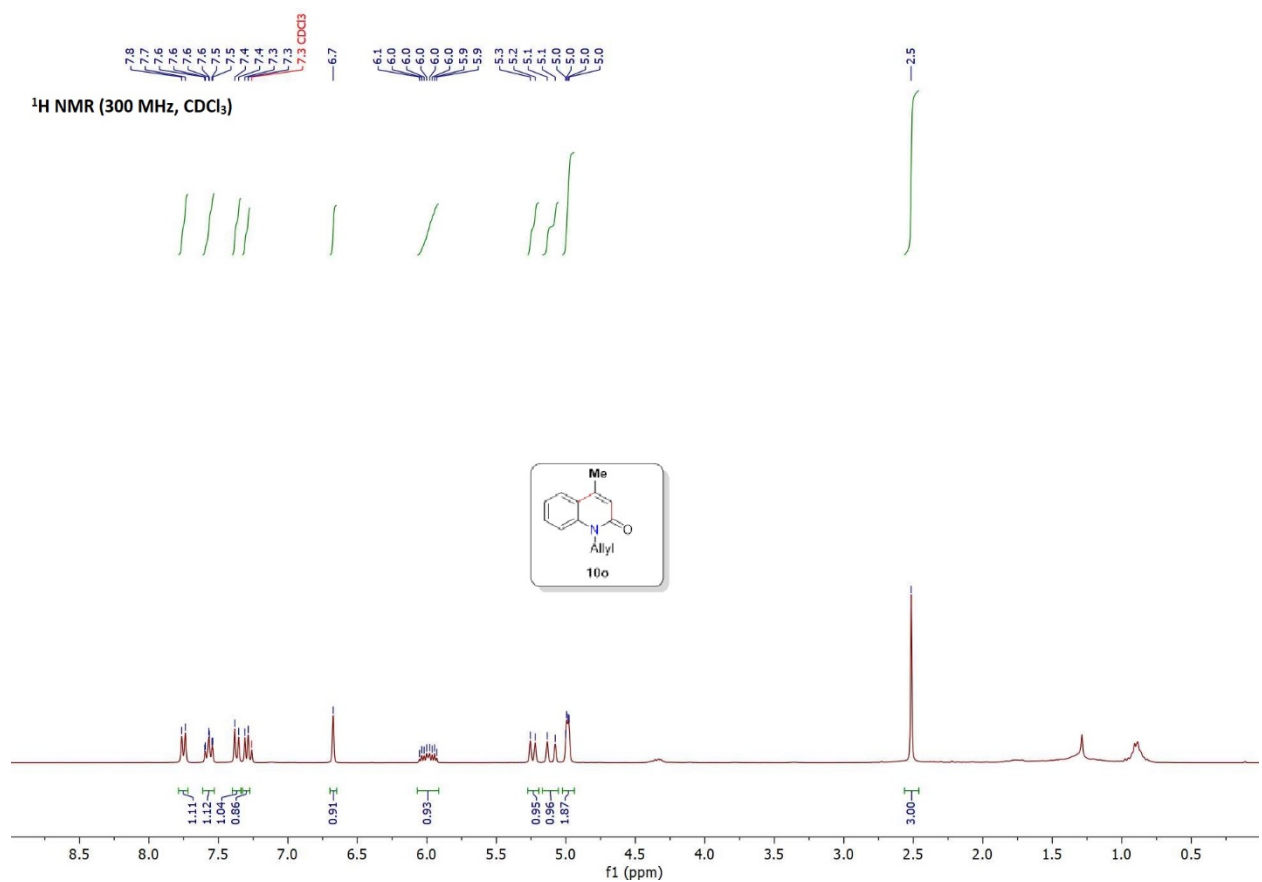

<sup>13</sup>C NMR (75 MHz, CDCl<sub>3</sub>)

161.9  
147.0  
139.1  
132.0  
130.5  
125.3  
122.1  
121.6  
121.0  
118.9  
113.2

77.6 CDCl<sub>3</sub>  
77.2 CDCl<sub>3</sub>  
76.7 CDCl<sub>3</sub>

44.4

19.2

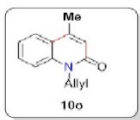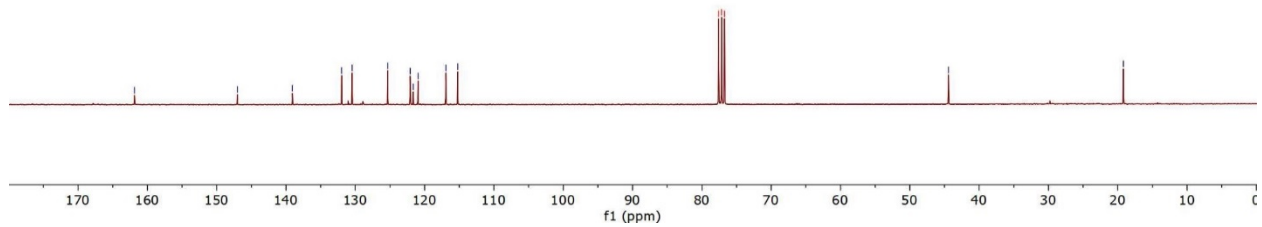

<sup>1</sup>H NMR (300 MHz, CDCl<sub>3</sub>)

7.75  
7.75  
7.73  
7.72  
7.62  
7.60  
7.57  
7.54  
7.54  
7.53  
7.52  
7.34  
7.33  
7.31  
7.31  
7.29  
7.28  
7.27  
7.26  
7.25  
7.23  
7.08  
6.88  
6.68  
6.65

2.54  
2.54

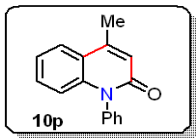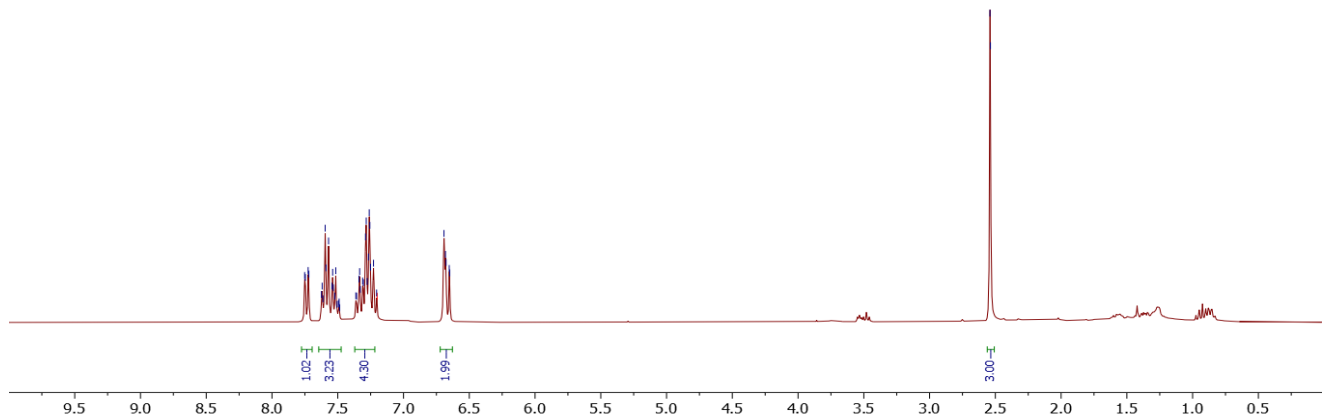

**<sup>13</sup>C NMR (101 MHz, CDCl<sub>3</sub>)**

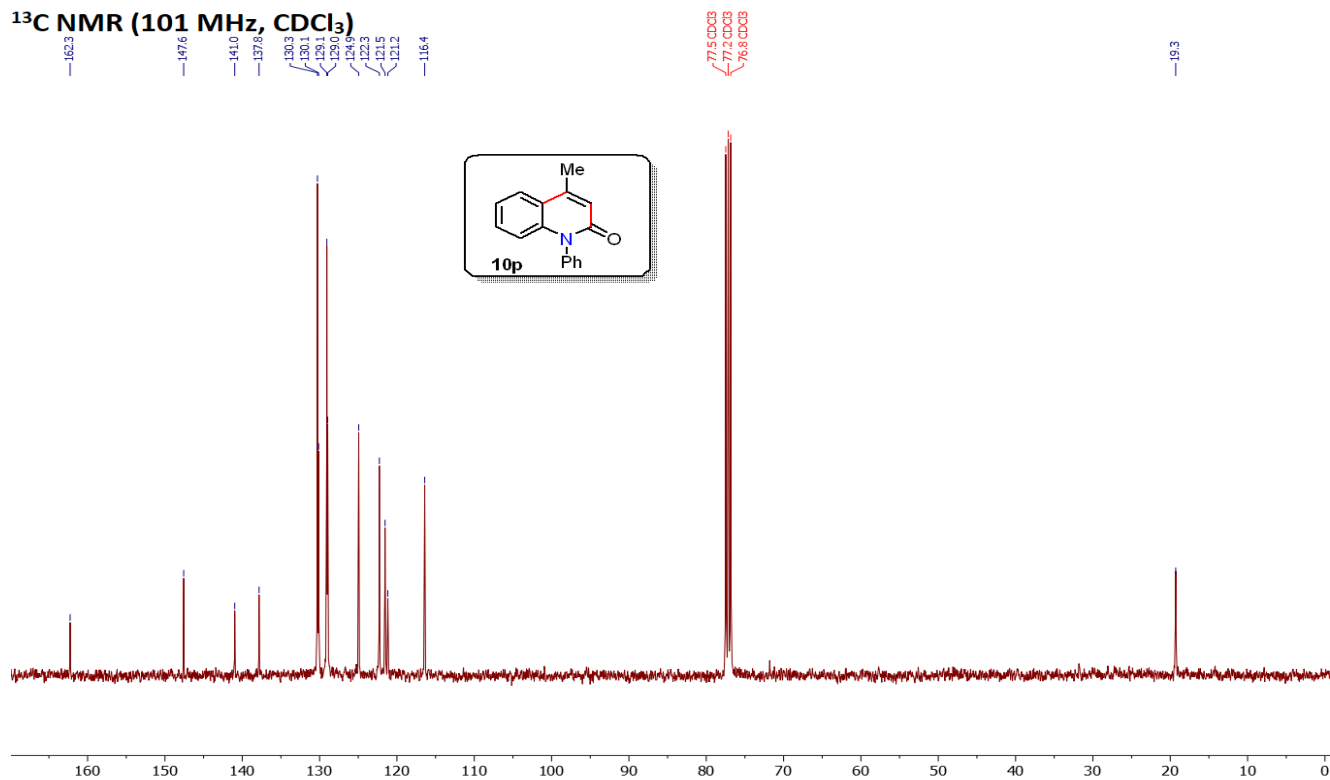

**<sup>1</sup>H NMR (300 MHz, CDCl<sub>3</sub>)**

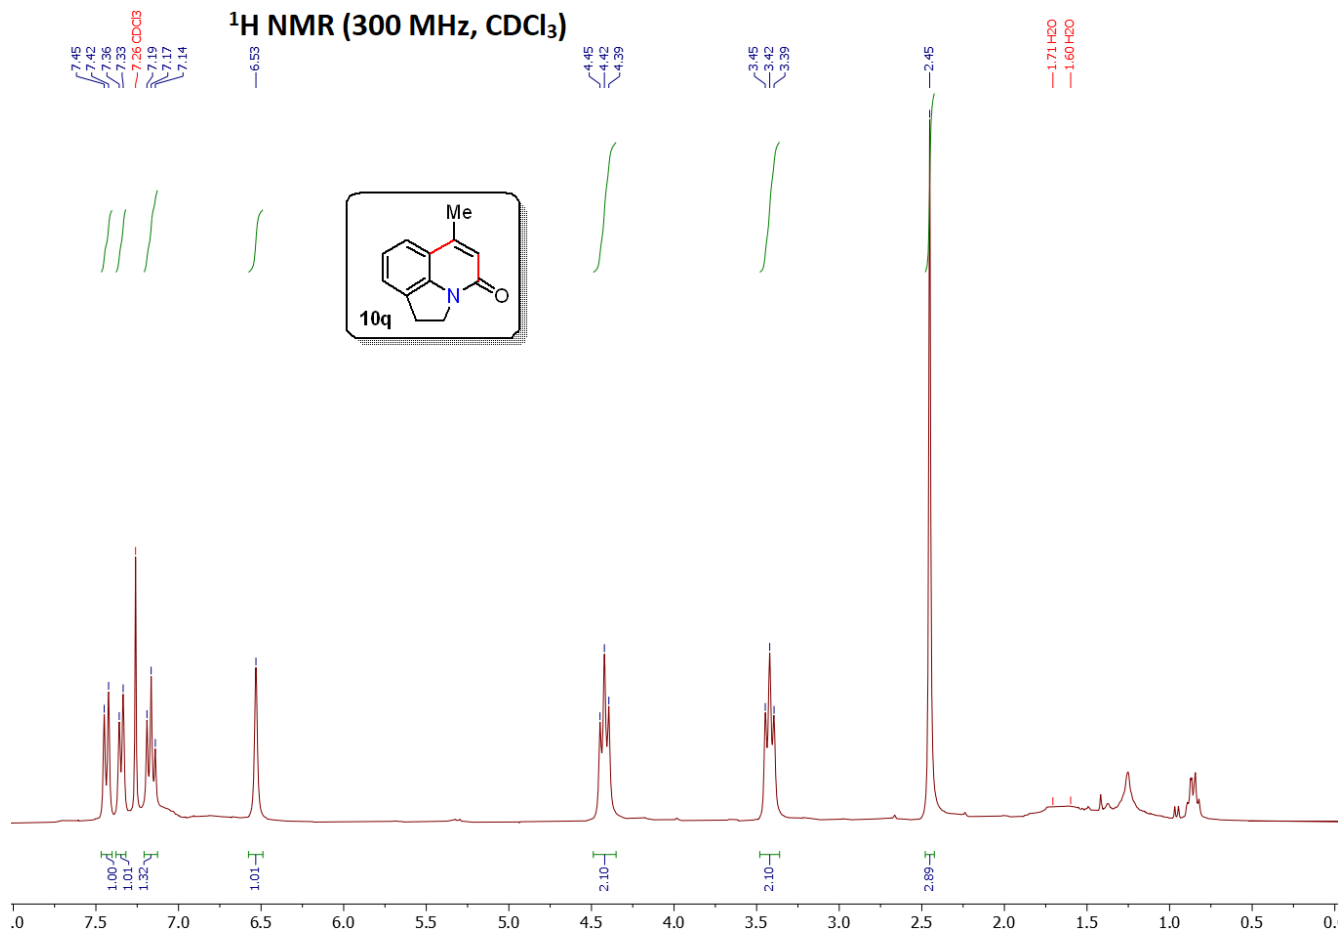

**<sup>13</sup>C NMR (101 MHz, CDCl<sub>3</sub>)**

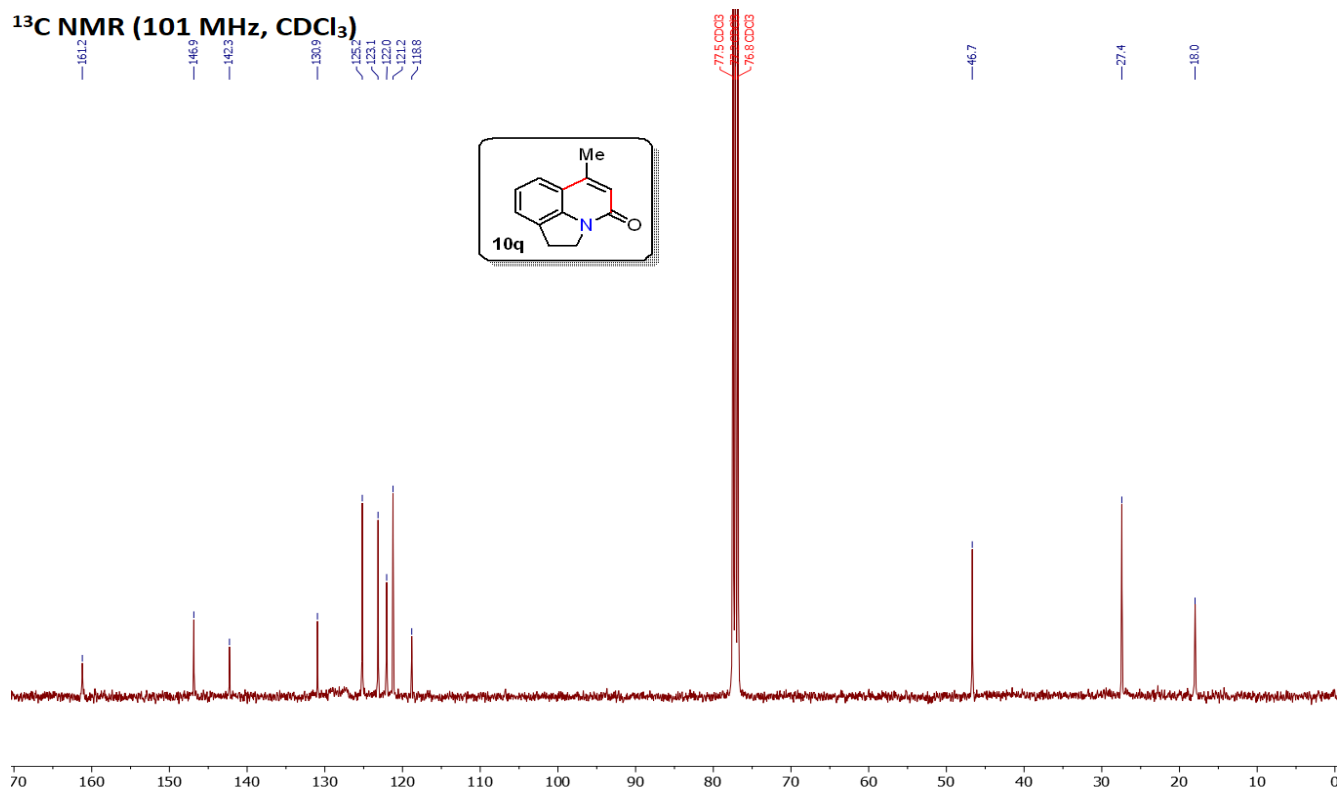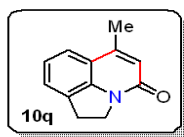

**<sup>1</sup>H NMR (300 MHz, CDCl<sub>3</sub>)**

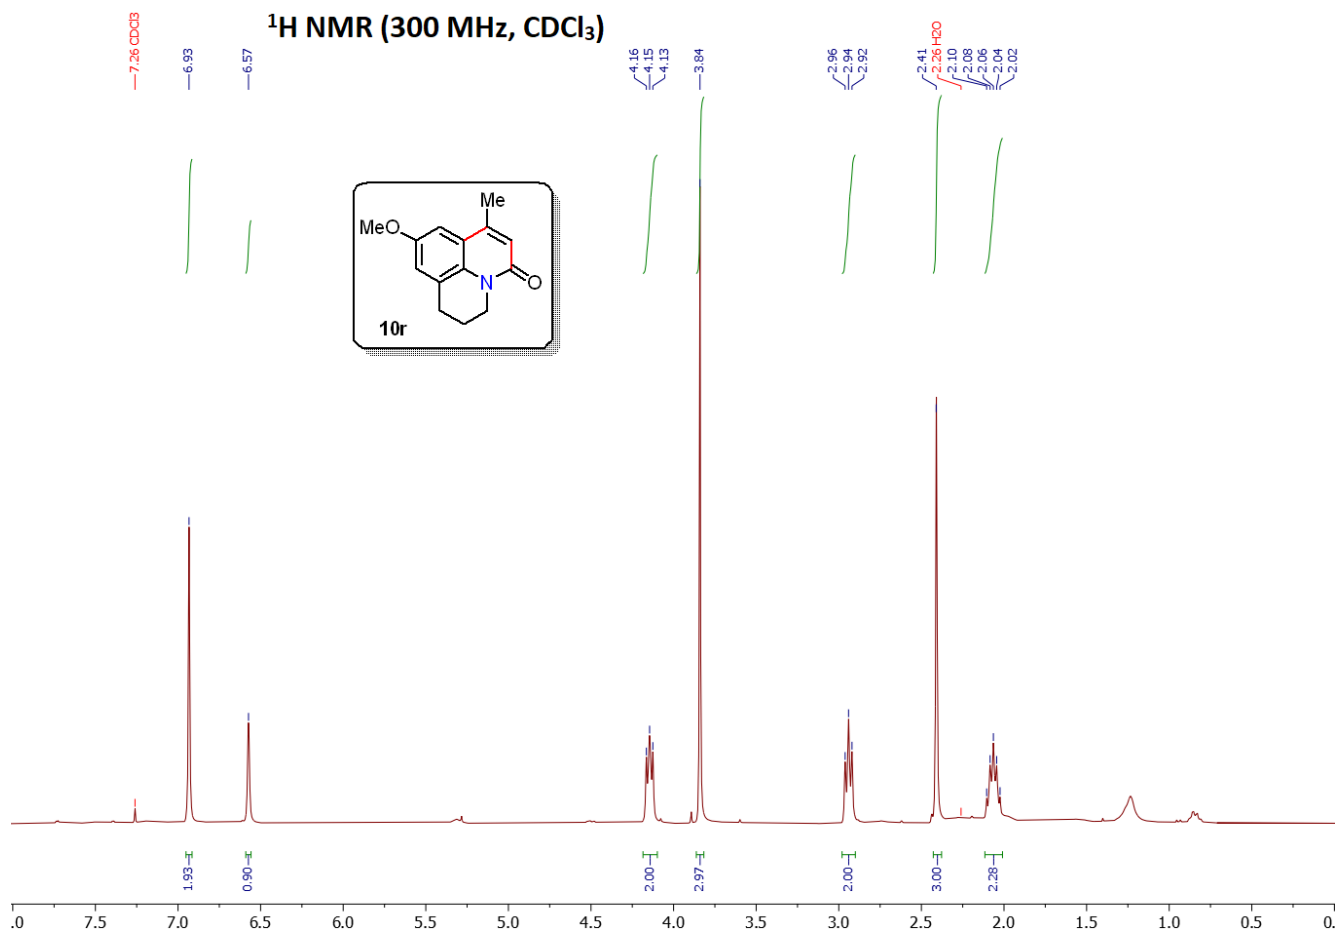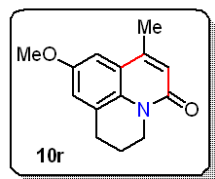

**<sup>13</sup>C NMR (101 MHz, CDCl<sub>3</sub>)**

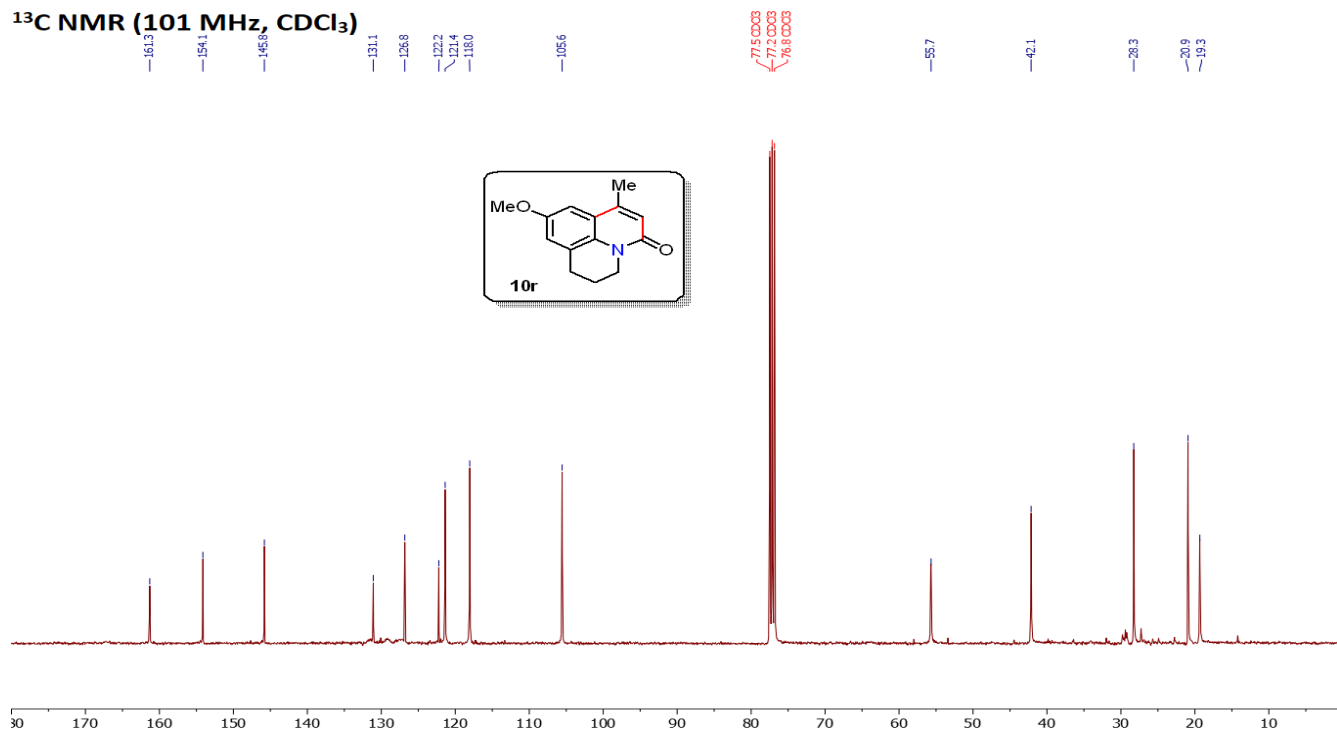

**<sup>1</sup>H NMR (300 MHz, CDCl<sub>3</sub>)**

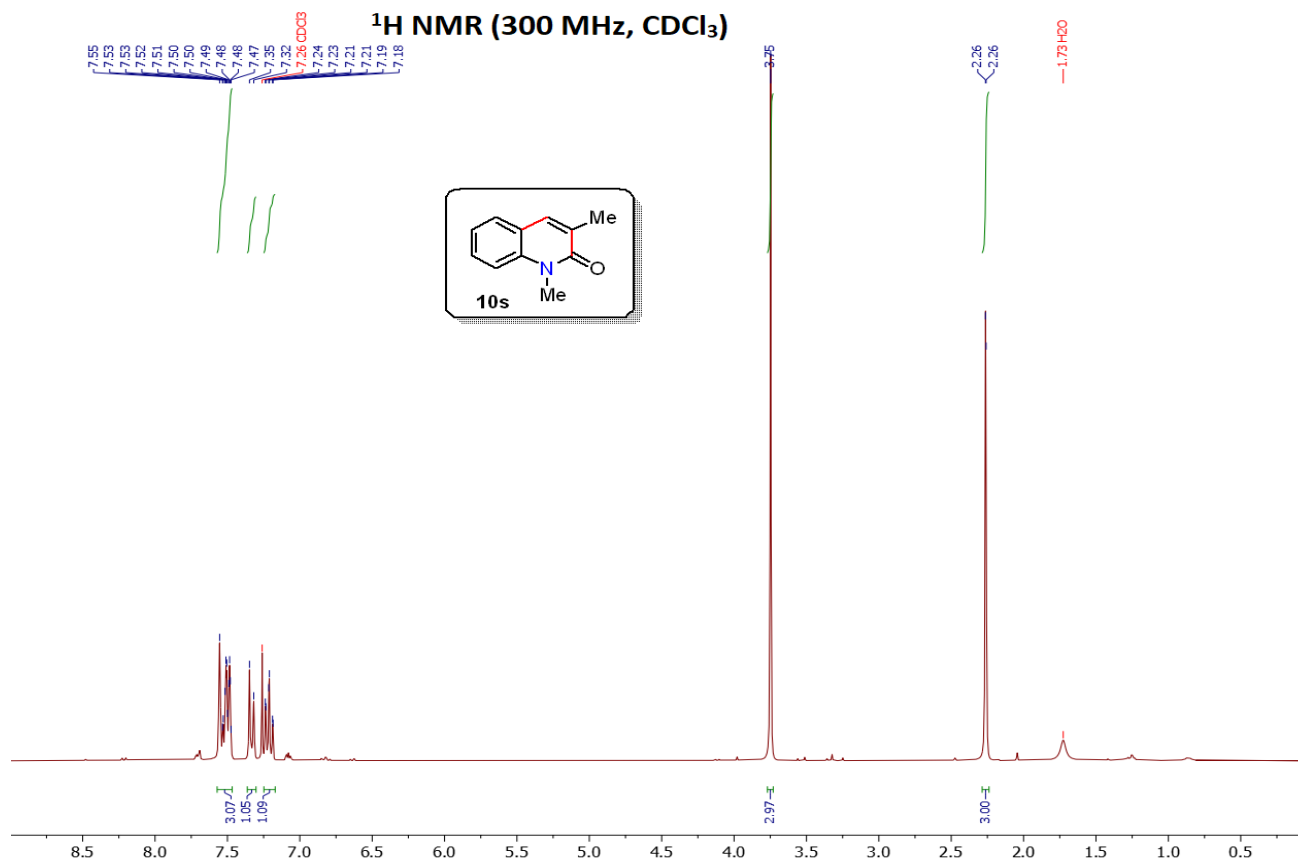

**<sup>13</sup>C NMR (151 MHz, CDCl<sub>3</sub>)**

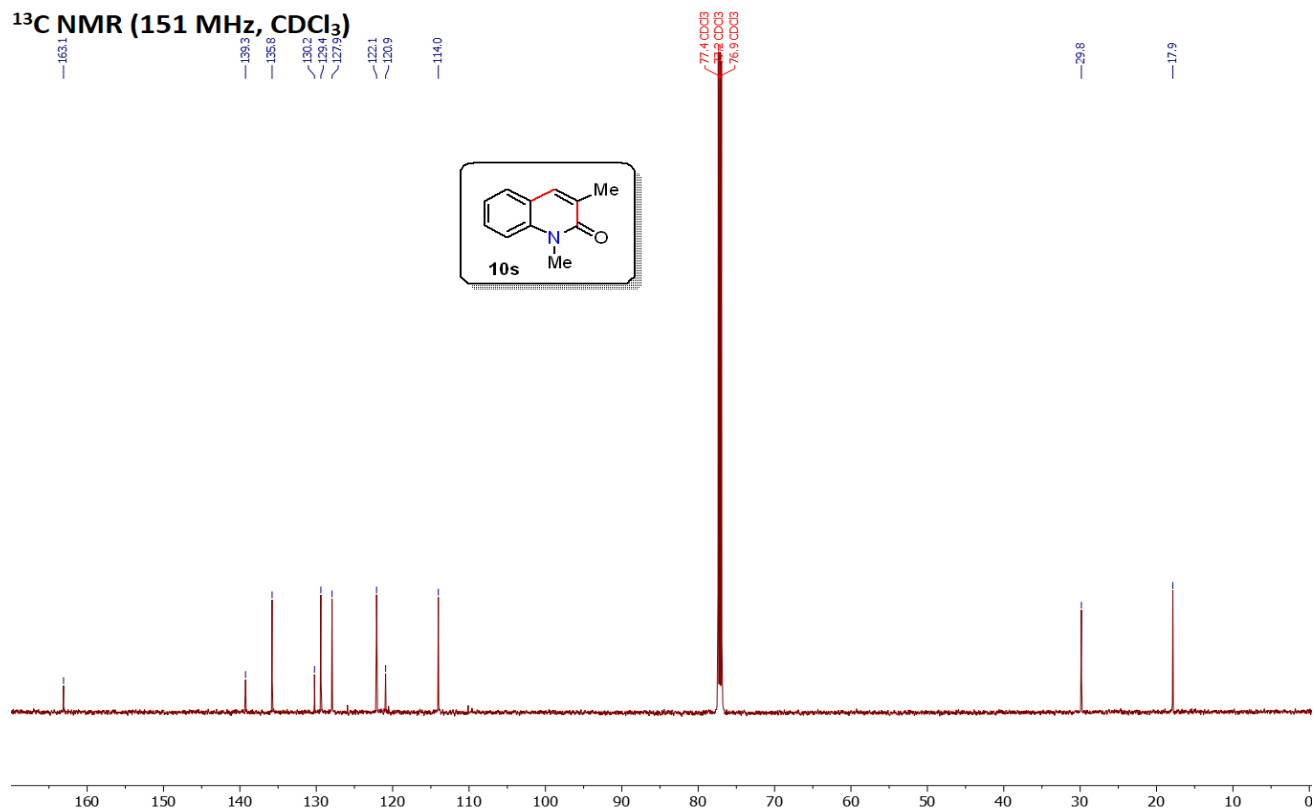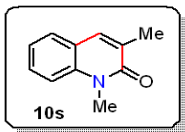

<sup>1</sup>H NMR (300 MHz, CDCl<sub>3</sub>)

| Chemical Shift (ppm)   |
|------------------------|
| 7.77                   |
| 7.76                   |
| 7.74                   |
| 7.74                   |
| 7.54                   |
| 7.54                   |
| 7.52                   |
| 7.51                   |
| 7.49                   |
| 7.39                   |
| 7.34                   |
| 7.27                   |
| 7.26 CDCl <sub>3</sub> |
| 7.25                   |
| 7.25                   |
| 7.24                   |
| 7.22                   |
| 3.75                   |
| 2.46                   |
| 2.29                   |
| 1.72 H <sub>2</sub> O  |

**<sup>1</sup>H NMR (300 MHz, CDCl<sub>3</sub>)**

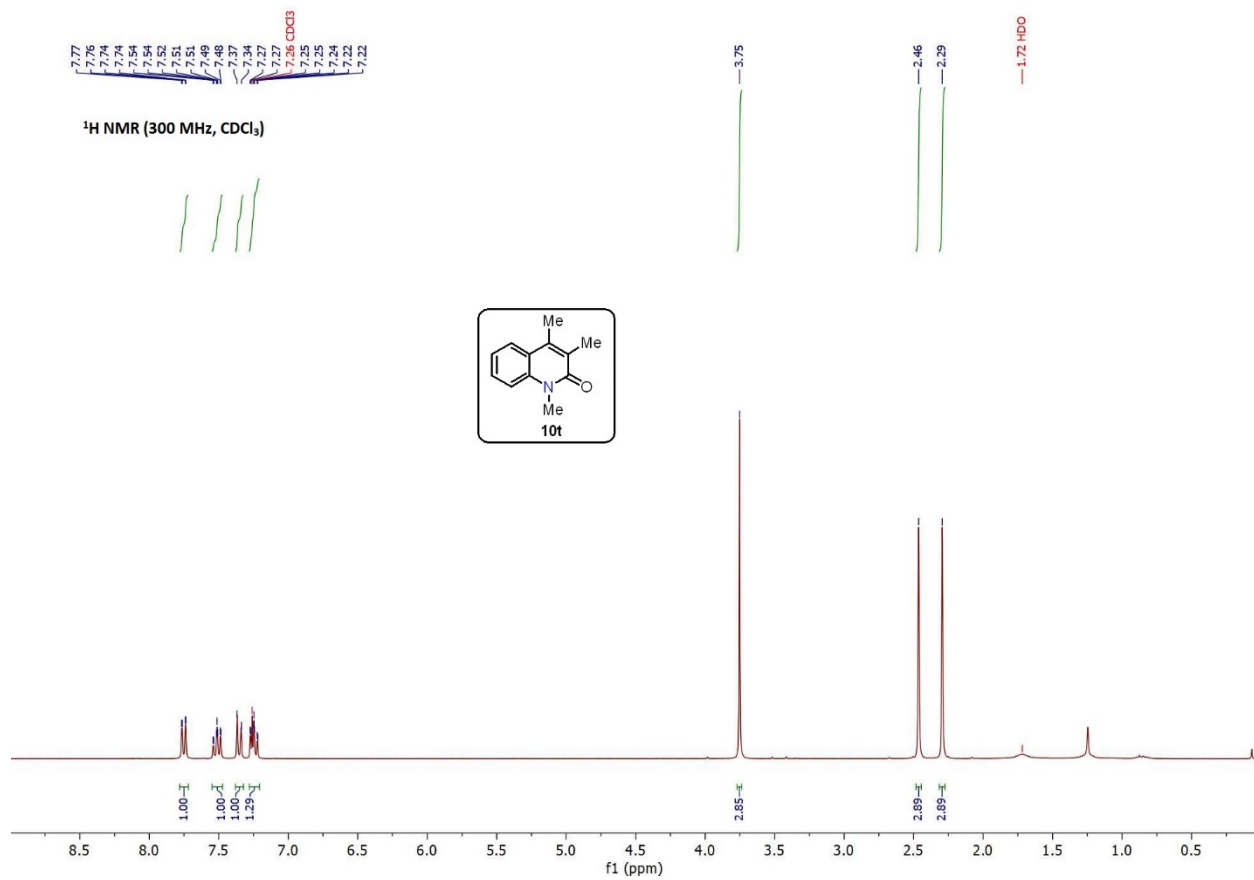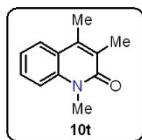



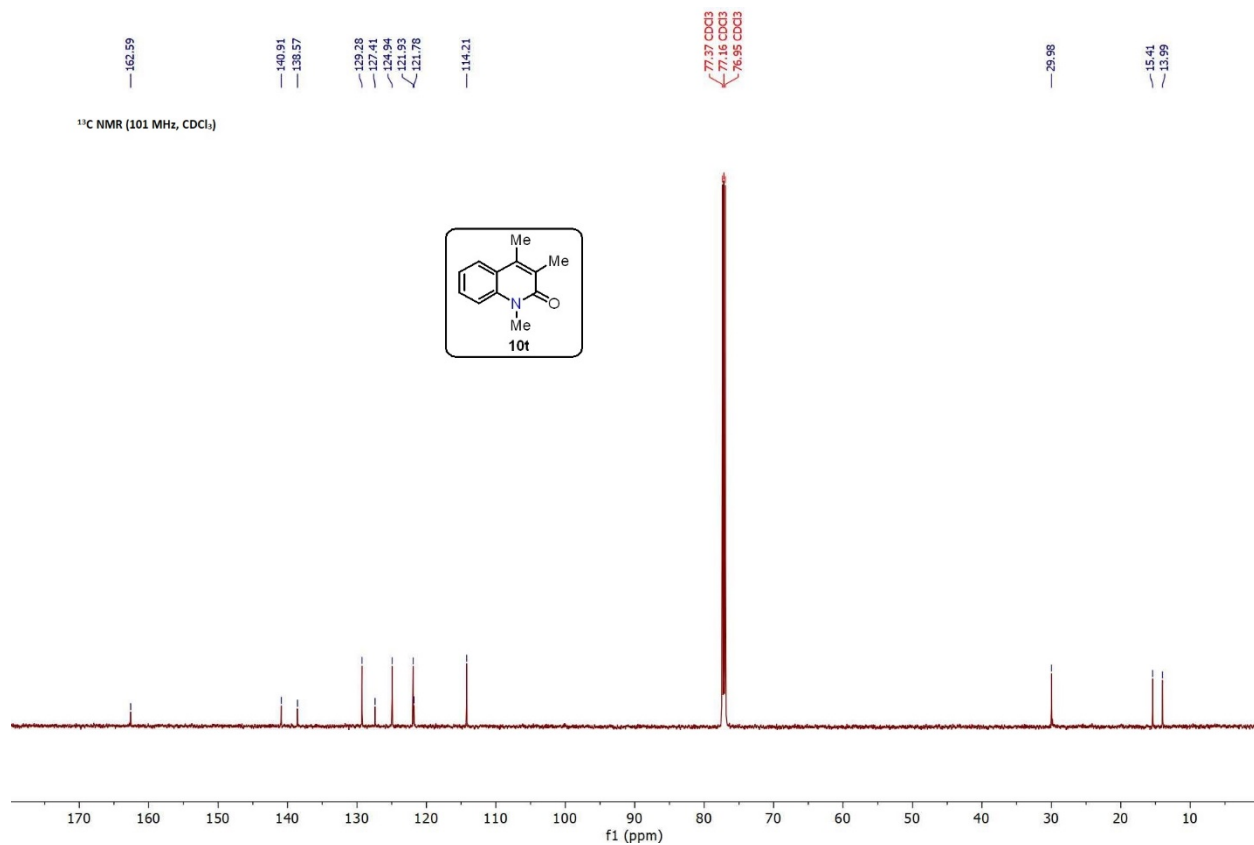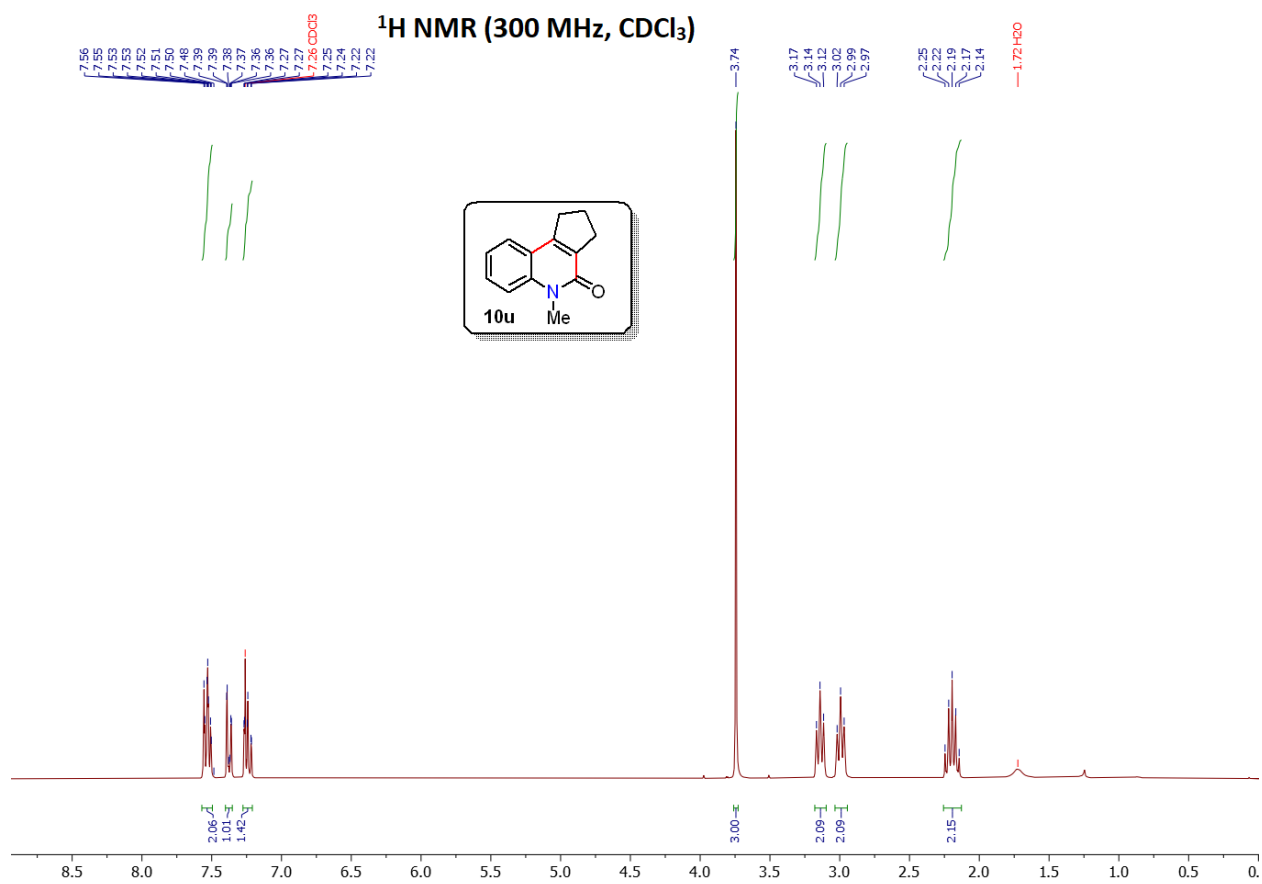

**<sup>13</sup>C NMR (151 MHz, CDCl<sub>3</sub>)**

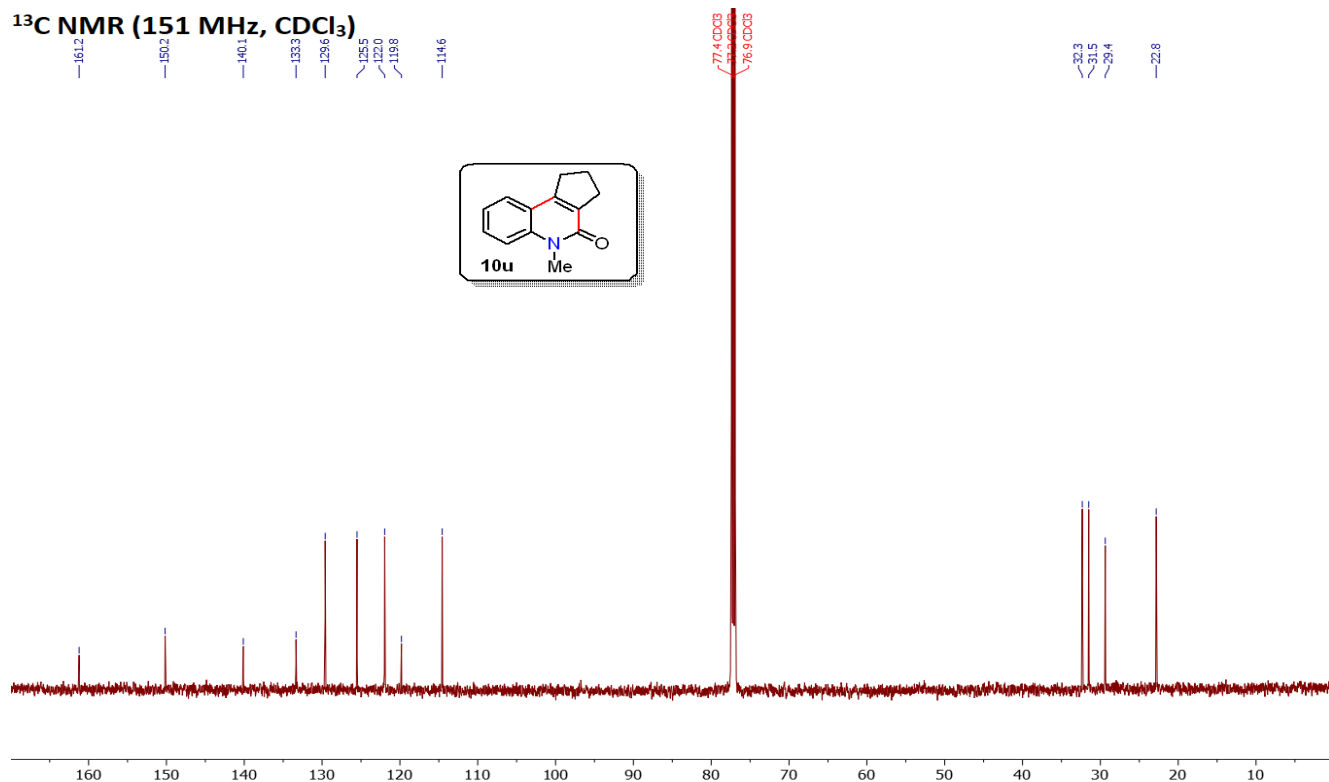

**<sup>1</sup>H NMR (300 MHz, CDCl<sub>3</sub>)**

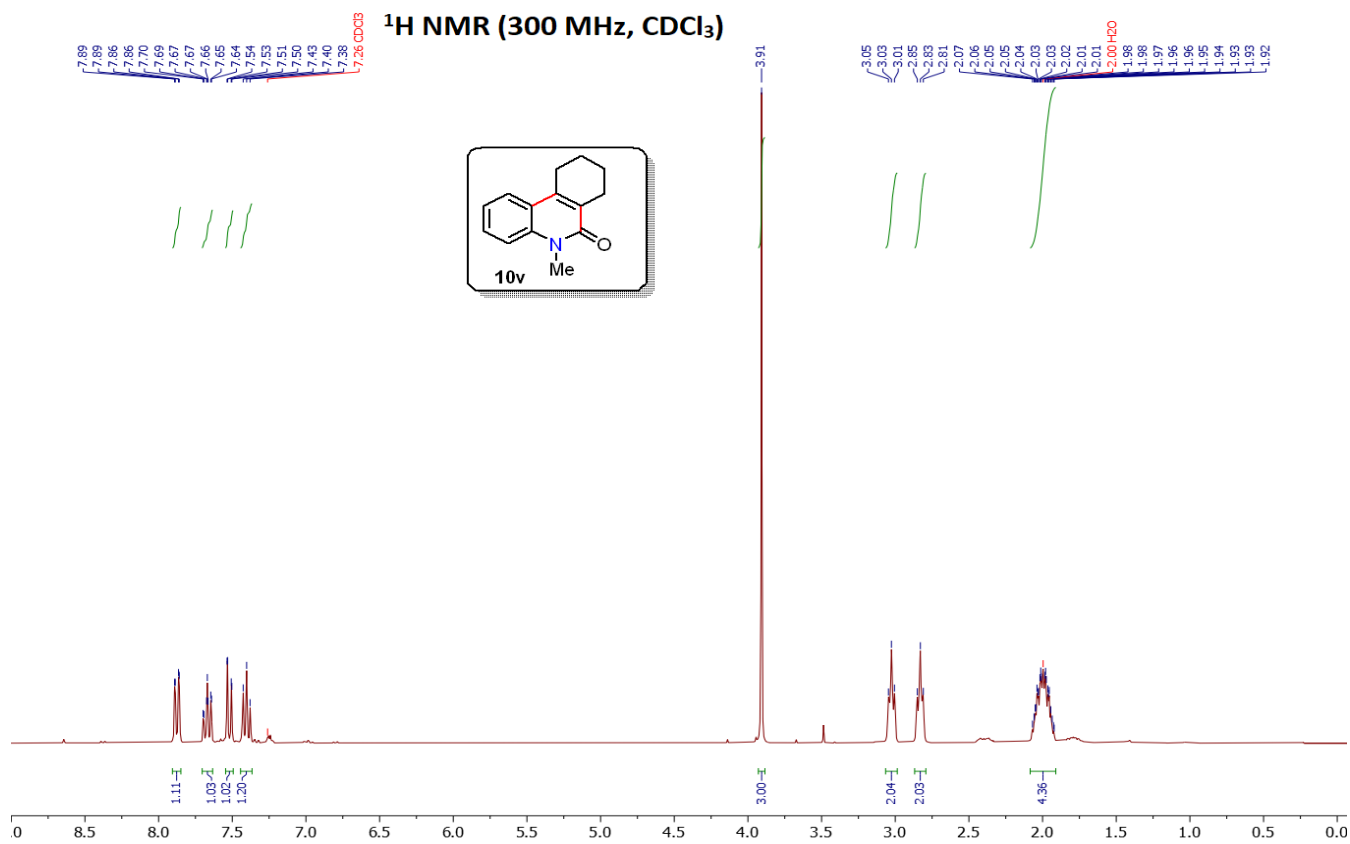

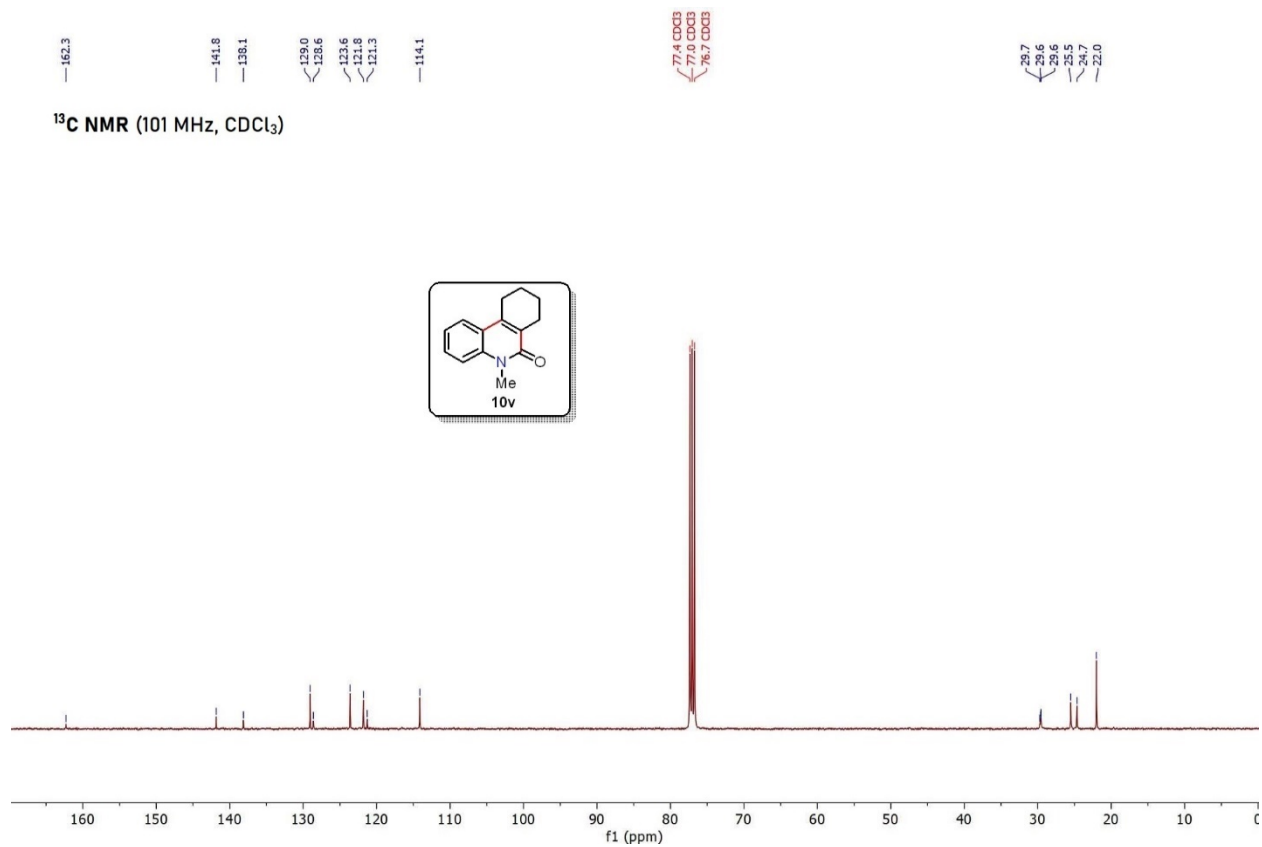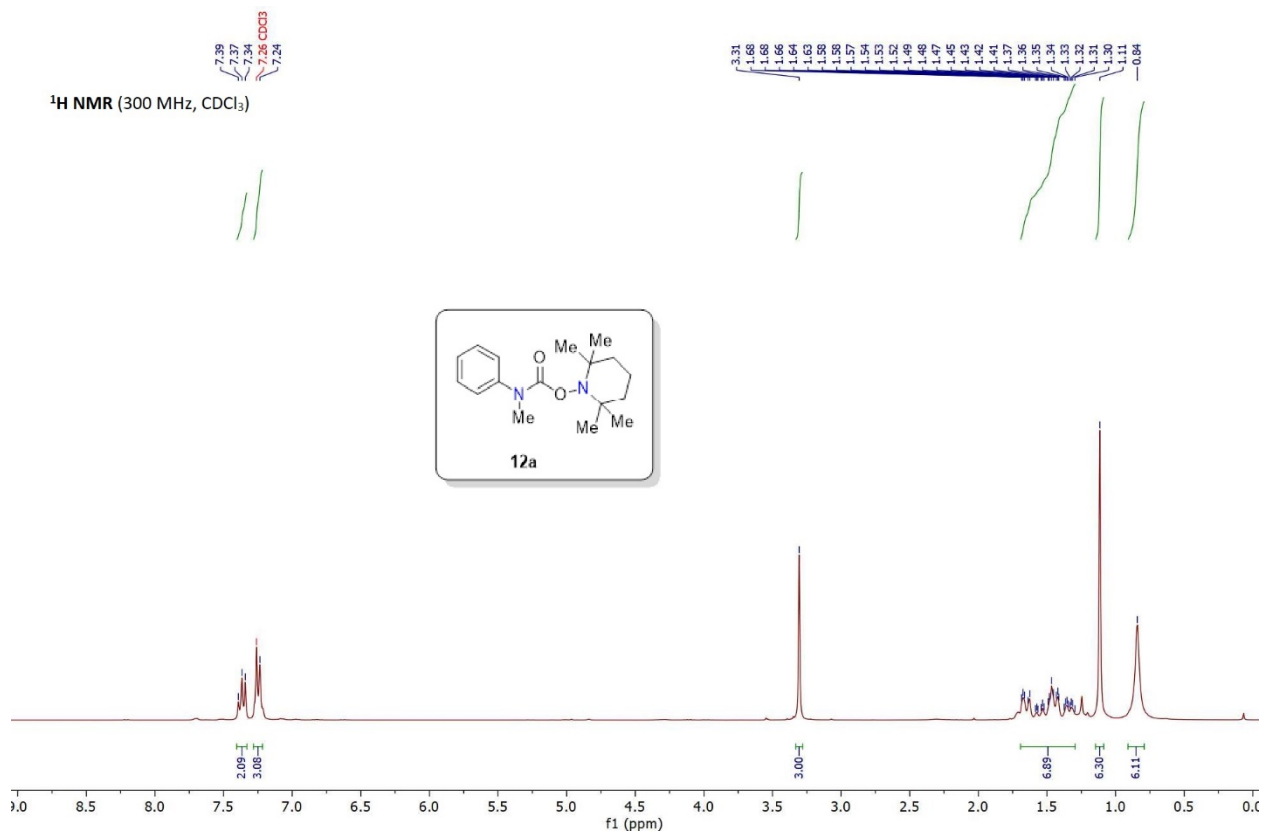

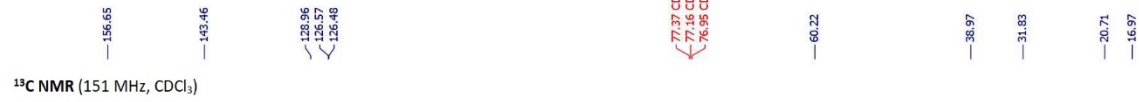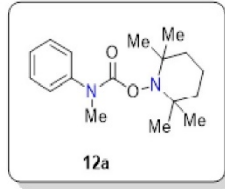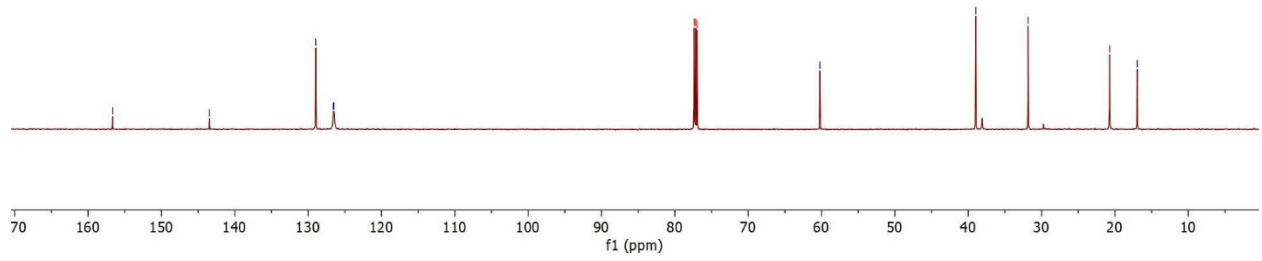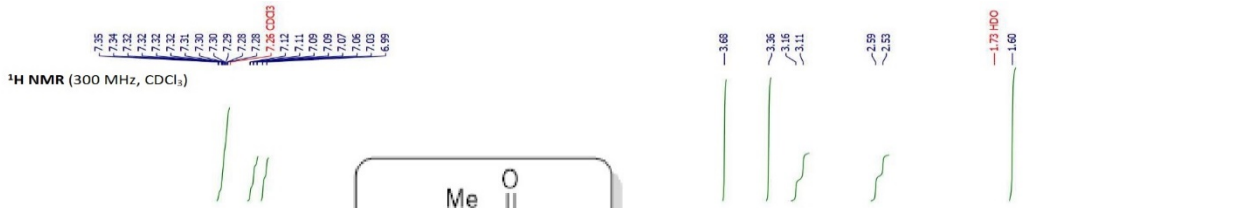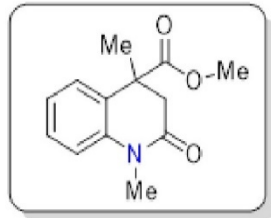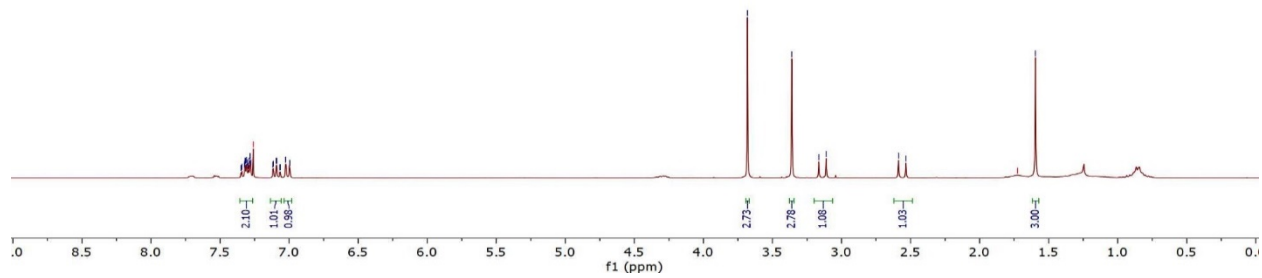

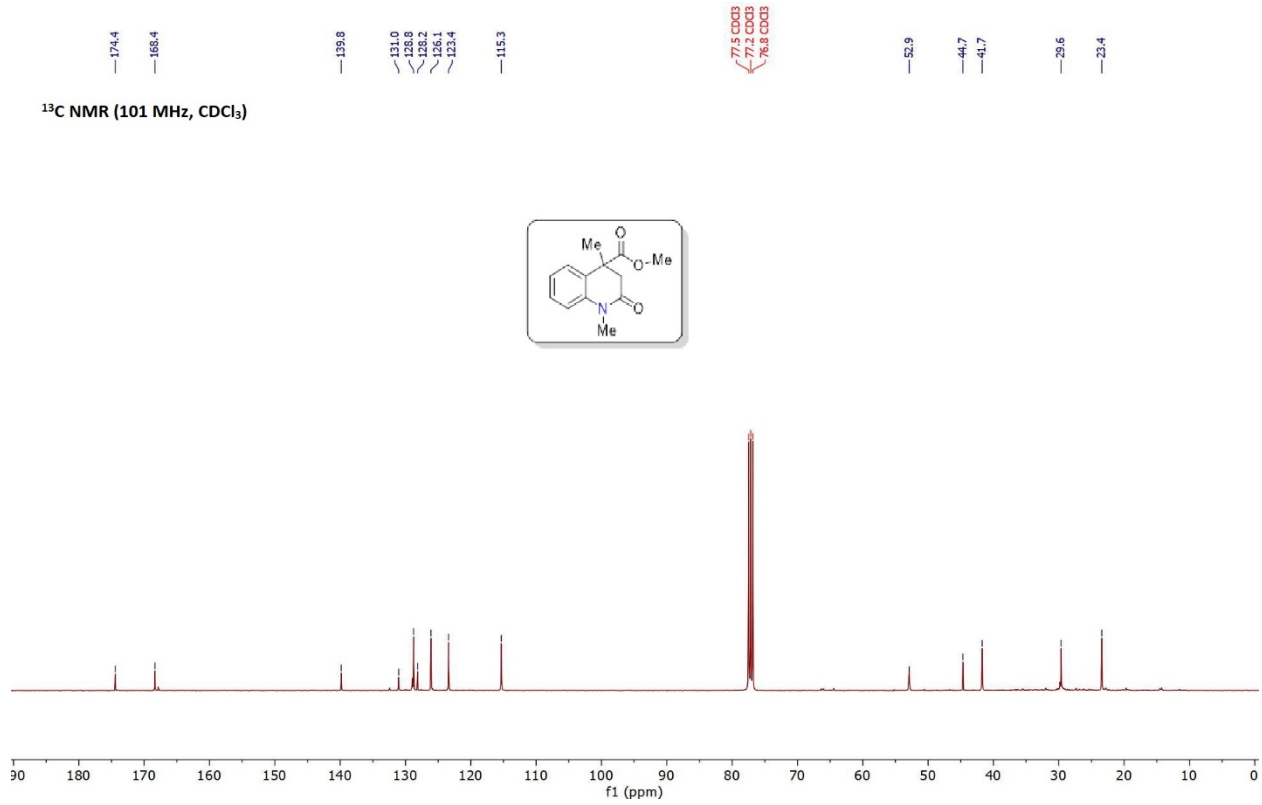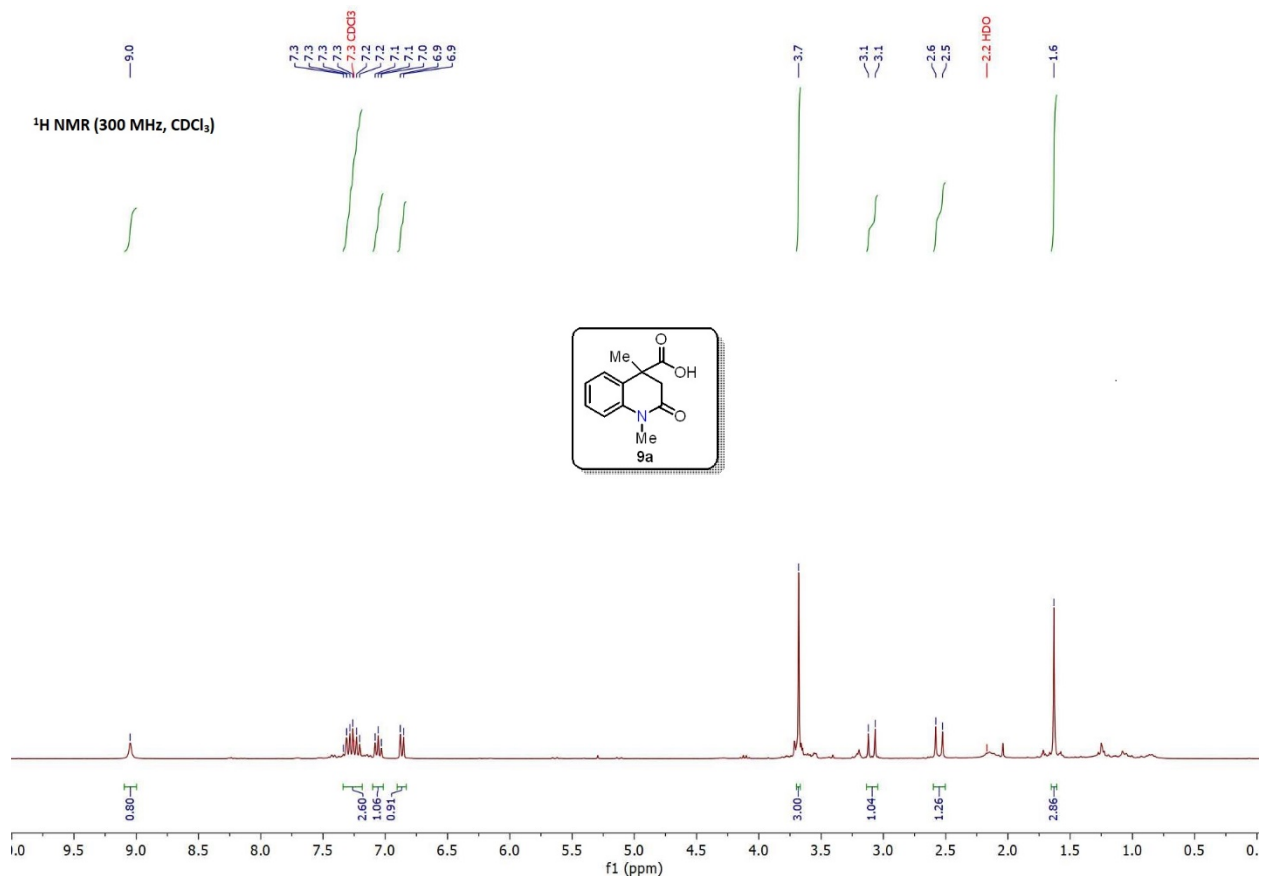

<sup>13</sup>C NMR (75 MHz, CDCl<sub>3</sub>)

—178.6

—171.7

—136.1

—129.1

—126.6

—125.3

—124.3

—116.7

77.6 CDCl<sub>3</sub>  
77.2 CDCl<sub>3</sub>  
76.7 CDCl<sub>3</sub>

—44.8

—40.5

—23.3

—21.0

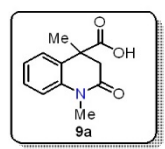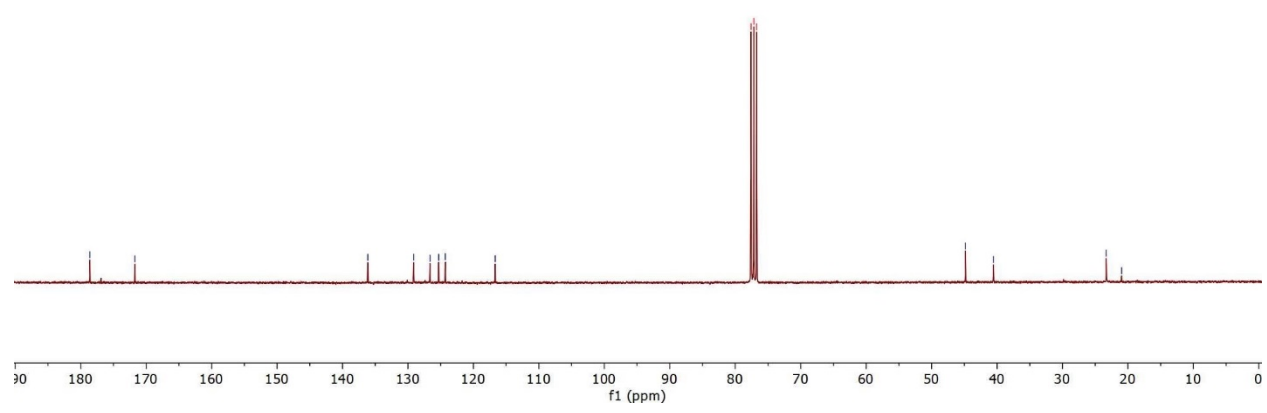

Supplement: d2ob00521b1.pdf [file d2ob00521b1.pdf]
